# Supplementary material for: Computational Methods Reveal a Series of Cyclic and Linear Lichenysins and Surfactins from the Vietnamese Marine Sediment-Derived Streptomyces Strain G222
Source: MDPI journal article supplement (doi:10.3390/molecules29071458), 2024-03-24
Supplement: s1 [file s1]

Supplementary materials

# Computational Methods Reveal a Series of Cyclic and Linear Lichenysins and Surfactins from the Vietnamese Marine Sediment-Derived *Streptomyces* Strain G222

Andrea Castaldi <sup>1</sup>, Bich Ngan Truong <sup>2</sup>, Quyen Thi Vu <sup>2,†</sup>, Thi Hong Minh Le <sup>2,†</sup>, Arul Marie <sup>1</sup>, Gaël Le Pennec <sup>3</sup>, Florent Rouvier <sup>4</sup>, Jean-Michel Brunel <sup>4</sup>, Arlette Longeon <sup>1</sup>, Van Cuong Pham <sup>2</sup>, Thi Mai Huong Doan <sup>2,\*</sup>, and Marie-Lise Bourguet-Kondracki <sup>1,\*</sup>

<sup>1</sup> Molécules de Communication et Adaptation des Microorganismes, UMR 7245 CNRS, Muséum National d'Histoire Naturelle, 57 rue Cuvier (CP54), 75005 Paris, France

<sup>2</sup> Institute of Marine Biochemistry (IMBC), Vietnam Academy of Science and Technology (VAST), 18 Hoang Quoc Viet, Cau Giay, Hanoi 100000, Vietnam

<sup>3</sup> Laboratoire de Biotechnologie et Chimie Marines, Université Bretagne Sud, EMR CNRS 6076, IUEM, 56100 Lorient, France

<sup>4</sup> UMR MD1 "Membranes et Cibles Thérapeutiques", U1261 INSERM, Aix-Marseille Université, Faculté de Pharmacie, 27 Bd Jean Moulin, CEDEX 5, 13385 Marseille, France

\* Correspondence: huongdm@imbc.vast.vn (D.T.M.H.); marie-lise.bourguet@mnhn.fr (M.-L.B.-K.)

† The authors contributed equally to the study

**Figure S1:** A) The molecular networking obtained through the LC-MS/MS analysis of the extract of G222. B) Zoom view of the discriminant cluster of the lipopeptides.

**Figure S2:** Fragmentations pattern and positive ion mode high-resolution ESI MS/MS spectrum for Lichenysin (1) ( $m/z$  979.6434  $[M + H]^+$ ).

**Figure S3:** Fragmentations pattern and positive ion mode high-resolution ESI MS/MS spectrum for Lichenysin (2) ( $m/z$  993.6581  $[M + H]^+$ ).

**Figure S4:** Fragmentations pattern and positive ion mode high-resolution ESI MS/MS spectrum for Lichenysin (3) ( $m/z$  1007.6734  $[M + H]^+$ ).

**Figure S5:** Fragmentations pattern and positive ion mode high-resolution ESI MS/MS spectrum for Lichenysin (4) (isoform of 3) ( $m/z$  1007.6733  $[M + H]^+$ ).

**Figure S6:** Fragmentations pattern and positive ion mode high-resolution ESI MS/MS spectrum for Lichenysin (5) ( $m/z$  1021.6896  $[M + H]^+$ ).

**Figure S7:** Fragmentations pattern and positive ion mode high-resolution ESI MS/MS spectrum for Lichenysin (6) ( $m/z$  1035.7063  $[M + H]^+$ ).

**Figure S8:** Fragmentations pattern and positive ion mode high-resolution ESI MS/MS spectrum for Lichenysin (7) (isoform of 6) ( $m/z$  1035.7063  $[M + H]^+$ ).

**Figure S9:** Fragmentations pattern and positive ion mode high-resolution ESI MS/MS spectrum for Lichenysin (8) ( $m/z$  1063.7366  $[M + H]^+$ ).

**Figure S10:** Fragmentations pattern and positive ion mode high-resolution ESI MS/MS spectrum for Lichenysin (9) ( $m/z$  1025.6832  $[M + H]^+$ ).

**Figure S11:** Fragmentations pattern and positive ion mode high-resolution ESI MS/MS spectrum for linear Lichenysin (10) ( $m/z$  1039.6990  $[M + H]^+$ ).

**Figure S12:** Fragmentations pattern and positive ion mode high-resolution ESI MS/MS spectrum for linear Lichenysin (11) ( $m/z$  1053.7147  $[M + H]^+$ ).

**Figure S13:** Fragmentations pattern and positive ion mode high-resolution ESI MS/MS spectrum for Surfactin (**12**) ( $m/z$  1008.6618  $[M + H]^+$ )

**Figure S14:** Fragmentations pattern and positive ion mode high-resolution ESI MS/MS spectrum for Surfactin (**13**) ( $m/z$  1022.6767  $[M + H]^+$ )

**Figure S15:** Fragmentations pattern and positive ion mode high-resolution ESI MS/MS spectrum for Surfactin (**14**) ( $m/z$  1036.6906  $[M + H]^+$ )

**Figure S16:** Fragmentations pattern and positive ion mode high-resolution ESI MS/MS spectrum for linear Surfactin (**15**) ( $m/z$  1054.7003  $[M + H]^+$ )

**Figure S17:** Molecular networks obtained using the Feature-Based Molecular Network workflow on GNPS (<https://gnps.ucsd.edu/ProteoSAFe/status.jsp?task=de168cddecfe40248fa3ba5077705e55>) (accessed on 23 May 2023).

**Figure S18:** Chemical fractionation schema of *Streptomyces* sp. G222 crude extract.

**Figure S19:** HPLC profile of the subfraction F9 at 210 nm.

**Figure S20:**  $^1\text{H}$ -NMR spectrum of Lichenysin (**3-4**) ( $m/z$  1007.6734 and 1007.6733  $[M + H]^+$ ) (600 MHz,  $\text{CD}_3\text{OH}$ ).

**Figure S21:** DEPTQ spectrum of Lichenysin (**3-4**) ( $m/z$  1007.6734 and 1007.6733  $[M + H]^+$ ) (600 MHz,  $\text{CD}_3\text{OH}$ ).

**Figure S22:** COSY-NMR spectrum of Lichenysin (**3-4**) ( $m/z$  1007.6734 and 1007.6733  $[M + H]^+$ ) (600 MHz,  $\text{CD}_3\text{OH}$ ).

**Figure S23:** TOCSY-NMR spectrum of Lichenysin (**3-4**) ( $m/z$  1007.6734 and 1007.6733  $[M + H]^+$ ) (600 MHz,  $\text{CD}_3\text{OH}$ ).

**Figure S24:** HSQC-NMR spectrum of Lichenysin (**3-4**) ( $m/z$  1007.6734 and 1007.6733  $[M + H]^+$ ) (600 MHz,  $\text{CD}_3\text{OH}$ ).

**Figure S25:** HMBC-NMR spectrum of Lichenysin (**3-4**) ( $m/z$  1007.6734 and 1007.6733  $[M + H]^+$ ) (600 MHz,  $\text{CD}_3\text{OH}$ ).

**Figure S26:** ROESY-NMR spectrum of Lichenysin (**3-4**) ( $m/z$  1007.6734 and 1007.6733  $[M + H]^+$ ) (600 MHz,  $\text{CD}_3\text{OH}$ ).

**Figure S27:** Structure of Lichenysins (**3-4**) ( $m/z$  1007.6734 and 1007.6733  $[M + H]^+$ ; respectively).

**Figure S28:**  $^1\text{H}$ -NMR spectrum of Lichenysin (**5a** and **5b**) ( $m/z$  1021.6896  $[M + H]^+$ ) (600 MHz,  $\text{CD}_3\text{OH}$ ).

**Figure S29:** DEPTQ spectrum of Lichenysin (**5a** and **5b**) ( $m/z$  1021.6896  $[M + H]^+$ ) (600 MHz,  $\text{CD}_3\text{OH}$ ).

**Figure S30:** COSY-NMR spectrum of Lichenysin (**5a** and **5b**) ( $m/z$  1021.6896  $[M + H]^+$ ) (600 MHz,  $\text{CD}_3\text{OH}$ ).

**Figure S31:** TOCSY-NMR spectrum of Lichenysin (**5a** and **5b**) ( $m/z$  1021.6896  $[M + H]^+$ ) (600 MHz,  $\text{CD}_3\text{OH}$ ).

**Figure S32:** HSQC-NMR spectrum of Lichenysin (**5a** and **5b**) ( $m/z$  1021.6896  $[M + H]^+$ ) (600 MHz,  $\text{CD}_3\text{OH}$ ).

**Figure S33:** HMBC-NMR spectrum of Lichenysin (**5a** and **5b**) ( $m/z$  1021.6896  $[M + H]^+$ ) (600 MHz,  $\text{CD}_3\text{OH}$ ).

**Figure S34:** ROESY-NMR spectrum of Lichenysin (**5a** and **5b**) ( $m/z$  1021.6896  $[M + H]^+$ ) (600 MHz,  $\text{CD}_3\text{OH}$ ).

**Figure S35:** Structure of Lichenysins (**5a** and **5b**) ( $m/z$  1021.6896  $[M + H]^+$ ).

**Figure S36:**  $^1\text{H}$ -NMR spectrum of Lichenysin (**6-7**) ( $m/z$  1035.7063  $[M + H]^+$ ) (600 MHz,  $\text{CD}_3\text{OH}$ ).

**Figure S37:** DEPTQ spectrum of Lichenysin (**6-7**) ( $m/z$  1035.7063  $[M + H]^+$ ) (600 MHz,  $\text{CD}_3\text{OH}$ ).

**Figure S38:** COSY-NMR spectrum of Lichenysin (**6-7**) ( $m/z$  1035.7063  $[M + H]^+$ ) (600 MHz,  $\text{CD}_3\text{OH}$ ).

**Figure S39:** TOCSY-NMR spectrum of Lichenysin (**6-7**) ( $m/z$  1035.7063  $[M + H]^+$ ) (600 MHz,  $\text{CD}_3\text{OH}$ ).

**Figure S40:** HSQC-NMR spectrum of Lichenysin (**6-7**) ( $m/z$  1035.7063  $[M + H]^+$ ) (600 MHz,  $\text{CD}_3\text{OH}$ ).

**Figure S41:** HMBC-NMR spectrum of Lichenysin (**6-7**) ( $m/z$  1035.7063  $[M + H]^+$ ) (600 MHz,  $\text{CD}_3\text{OH}$ ).

**Figure S42:** ROESY-NMR spectrum of Lichenysin (**6-7**) ( $m/z$  1035.7063  $[M + H]^+$ ) (600 MHz,  $\text{CD}_3\text{OH}$ ).

**Figure S43:** Structure of Lichenysins (**6-7**) ( $m/z$  1035.7063  $[M + H]^+$ ).

**Figure S44:** Marfey's analysis in positive ion mode high-resolution ESI mass spectrum

**Figure S45:** Biofilm-forming activity against *Pseudomonas aeruginosa* MUC-N1.

**Figure S46:** A) ATP release in *S. aureus* MRSA exhibited by compounds (**3-4**) and (**6-7**) as determined using ATP efflux assay. Squalamine ( $100\text{ }\mu\text{g.mL}^{-1}$ ) was the positive control and water was the negative control. Compounds were tested at a final concentration of  $100\text{ }\mu\text{g.mL}^{-1}$ , and results are reported as relative luminescence unit. B) Bacterial growth

inhibition exhibited by (3-4) and (6-7) against *S. aureus* MRSA (CF-Marseille) with different concentrations. Positive control was bacteria only and negative control was media only.

**Table S1:** Product ion spectra data for Lichenysin (1) ( $m/z$  979.6434 [M + H]<sup>+</sup>)

**Table S2:** Product ion spectra data for Lichenysin (2) ( $m/z$  993.6581 [M + H]<sup>+</sup>)

**Table S3:** Product ion spectra data for Lichenysin (3) ( $m/z$  1007.6734 [M + H]<sup>+</sup>)

**Table S4:** Product ion spectra data for Lichenysin (4) (isoform of 3) ( $m/z$  1007.6733 [M + H]<sup>+</sup>)

**Table S5:** Product ion spectra data for Lichenysin (5) ( $m/z$  1021.6896 [M + H]<sup>+</sup>)

**Table S6:** Product ion spectra data for Lichenysin (6) ( $m/z$  1035.7063 [M + H]<sup>+</sup>)

**Table S7:** Product ion spectra data Lichenysin (7) (isoform of 6) ( $m/z$  1035.7063 [M + H]<sup>+</sup>)

**Table S8:** Product ion spectra data Lichenysin (8) ( $m/z$  1063.7366 [M + H]<sup>+</sup>)

**Table S9:** Product ion spectra data for Lichenysin (9) ( $m/z$  1025.6832 [M + H]<sup>+</sup>)

**Table S10:** Product ion spectra data for Linear Lichenysin (10) ( $m/z$  1039.6990 [M + H]<sup>+</sup>)

**Table S11:** Product ion spectra data for Linear Lichenysin (11) ( $m/z$  1053.7147 [M + H]<sup>+</sup>)

**Table S12:** Product ion spectra data for Surfactin (12) ( $m/z$  1008.6618 [M + H]<sup>+</sup>)

**Table S13:** Product ion spectra data for Surfactin (13) ( $m/z$  1022.6767 [M + H]<sup>+</sup>)

**Table S14:** Product ion spectra data for Surfactin (14) ( $m/z$  1036.6906 [M + H]<sup>+</sup>)

**Table S15:** Product ion spectra data for Linear Surfactin (15) ( $m/z$  1054.7003 [M + H]<sup>+</sup>)

**Table S16.** <sup>1</sup>H, <sup>13</sup>C, HMBC, and ROESY NMR data of Lichenysin (3-4) ( $m/z$  1007.6734 and 1007.6733 [M + H]<sup>+</sup>) (600 MHz, CD<sub>3</sub>OH), isoform *ante-iso* and *iso* (0.8:0.2).

**Table S17.** <sup>1</sup>H, <sup>13</sup>C, HMBC, and ROESY NMR data of Lichenysin (5a and 5b) ( $m/z$  1021.6896 [M + H]<sup>+</sup>) (600 MHz, CD<sub>3</sub>OH) isoform: *iso* and *n* (0.5:0.5).

**Table S18.** <sup>1</sup>H, <sup>13</sup>C, HMBC, and ROESY NMR data of Lichenysin (6-7) ( $m/z$  1035.7063 [M + H]<sup>+</sup>) (600 MHz, CD<sub>3</sub>OH) isoform: *ante-iso* and *iso* (0.2:0.8).

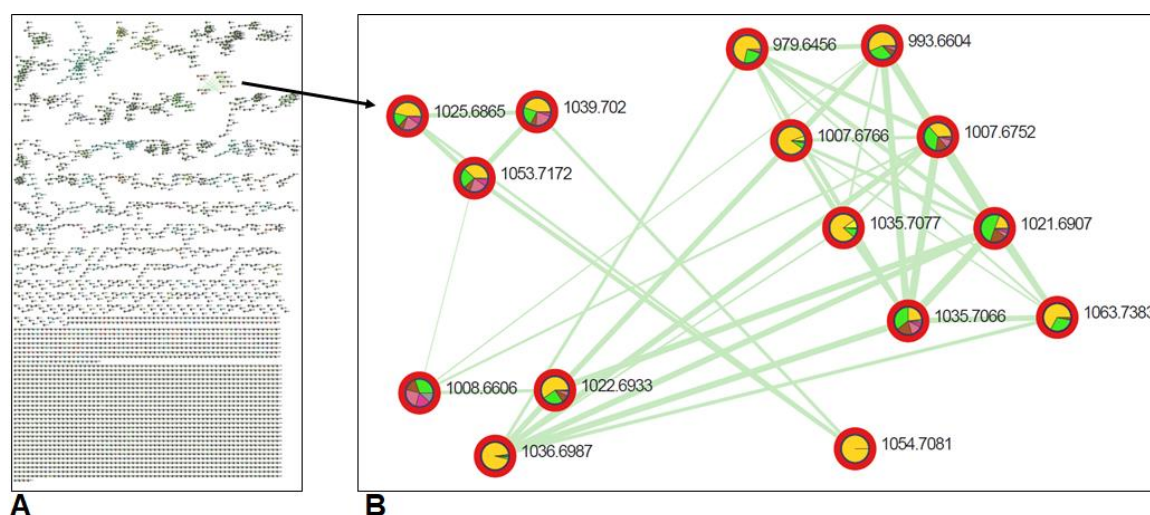

**Figure S1.** A) The molecular networking obtained through the LC-MS/MS analysis of the extract of G222. B) Zoom view of the discriminant cluster of the lipopeptides.

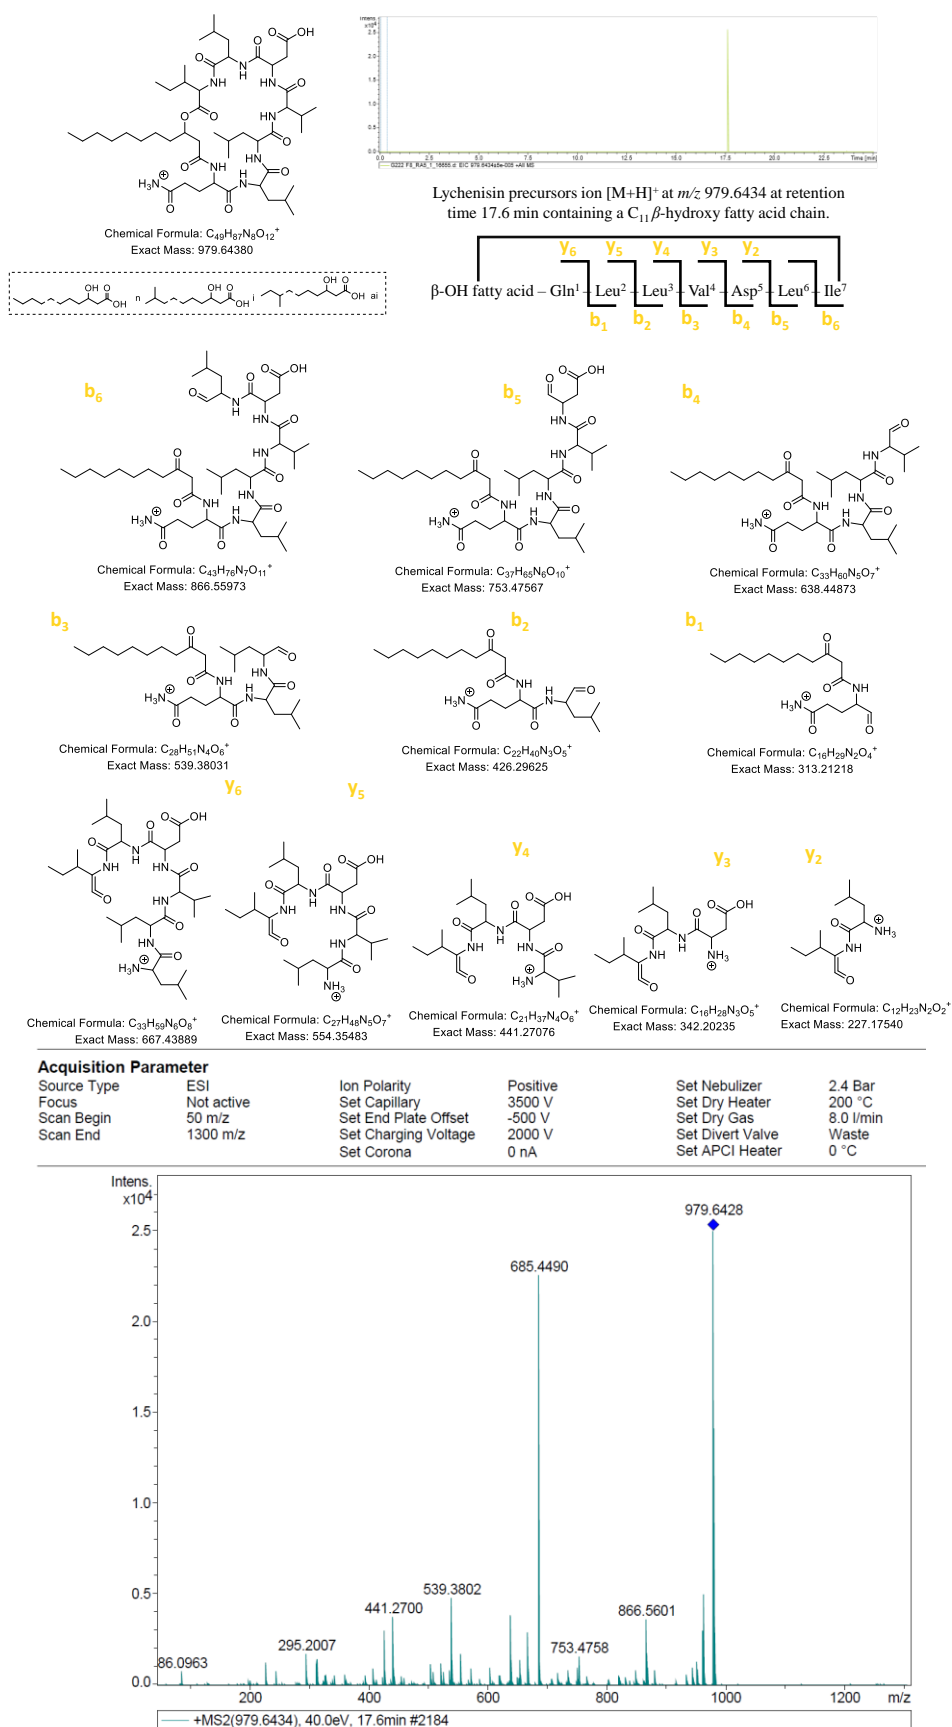

**Figure S2:** Fragmentations pattern and positive ion mode high-resolution ESI MS/MS spectrum for Lichenysin (**1**) ( $m/z$  979.6501  $[M + H]^+$ ).

**Table S1.** Product ion spectra data for Lichenysin (1) ( $m/z$  979.6434  $[M + H]^+$ ).

| Product ion Assignment                                                                                                                                         | ( $m/z$ ) | Error, pm | Molecular Formula                                              |
|----------------------------------------------------------------------------------------------------------------------------------------------------------------|-----------|-----------|----------------------------------------------------------------|
| $\beta$ -OH fatty acid – Gln <sup>1</sup> – Leu <sup>2</sup> – Leu <sup>3</sup> – Val <sup>4</sup> –<br>Asp <sup>5</sup> – Leu <sup>6</sup> – Ile <sup>7</sup> | 979.6434  | 0.4       | C <sub>49</sub> H <sub>87</sub> N <sub>8</sub> O <sub>12</sub> |
| b <sub>6</sub>                                                                                                                                                 | 866.5601  | 0.4       | C <sub>43</sub> H <sub>76</sub> N <sub>7</sub> O <sub>11</sub> |
| b <sub>5</sub>                                                                                                                                                 | 753.4758  | -0.2      | C <sub>37</sub> H <sub>65</sub> N <sub>6</sub> O <sub>10</sub> |
| b <sub>4</sub>                                                                                                                                                 | 638.4484  | 0.5       | C <sub>33</sub> H <sub>60</sub> N <sub>5</sub> O <sub>7</sub>  |
| b <sub>3</sub>                                                                                                                                                 | 539.3802  | 0.3       | C <sub>28</sub> H <sub>51</sub> N <sub>4</sub> O <sub>6</sub>  |
| b <sub>2</sub>                                                                                                                                                 | 426.2960  | 0.6       | C <sub>22</sub> H <sub>40</sub> N <sub>3</sub> O <sub>5</sub>  |
| b <sub>1</sub>                                                                                                                                                 | 313.2116  | 1.8       | C <sub>16</sub> H <sub>29</sub> N <sub>2</sub> O <sub>4</sub>  |
| y <sub>6</sub>                                                                                                                                                 | 667.4395  | -0.9      | C <sub>33</sub> H <sub>59</sub> N <sub>8</sub> O <sub>6</sub>  |
| y <sub>5</sub>                                                                                                                                                 | 554.3550  | -0.3      | C <sub>27</sub> H <sub>48</sub> N <sub>5</sub> O <sub>7</sub>  |
| y <sub>4</sub>                                                                                                                                                 | 441.2700  | 1.8       | C <sub>21</sub> H <sub>37</sub> N <sub>4</sub> O <sub>6</sub>  |
| y <sub>3</sub>                                                                                                                                                 | 342.2022  | 0.4       | C <sub>16</sub> H <sub>32</sub> N <sub>5</sub> O <sub>3</sub>  |
| y <sub>2</sub>                                                                                                                                                 | 227.1753  | 0.7       | C <sub>12</sub> H <sub>23</sub> N <sub>2</sub> O <sub>2</sub>  |

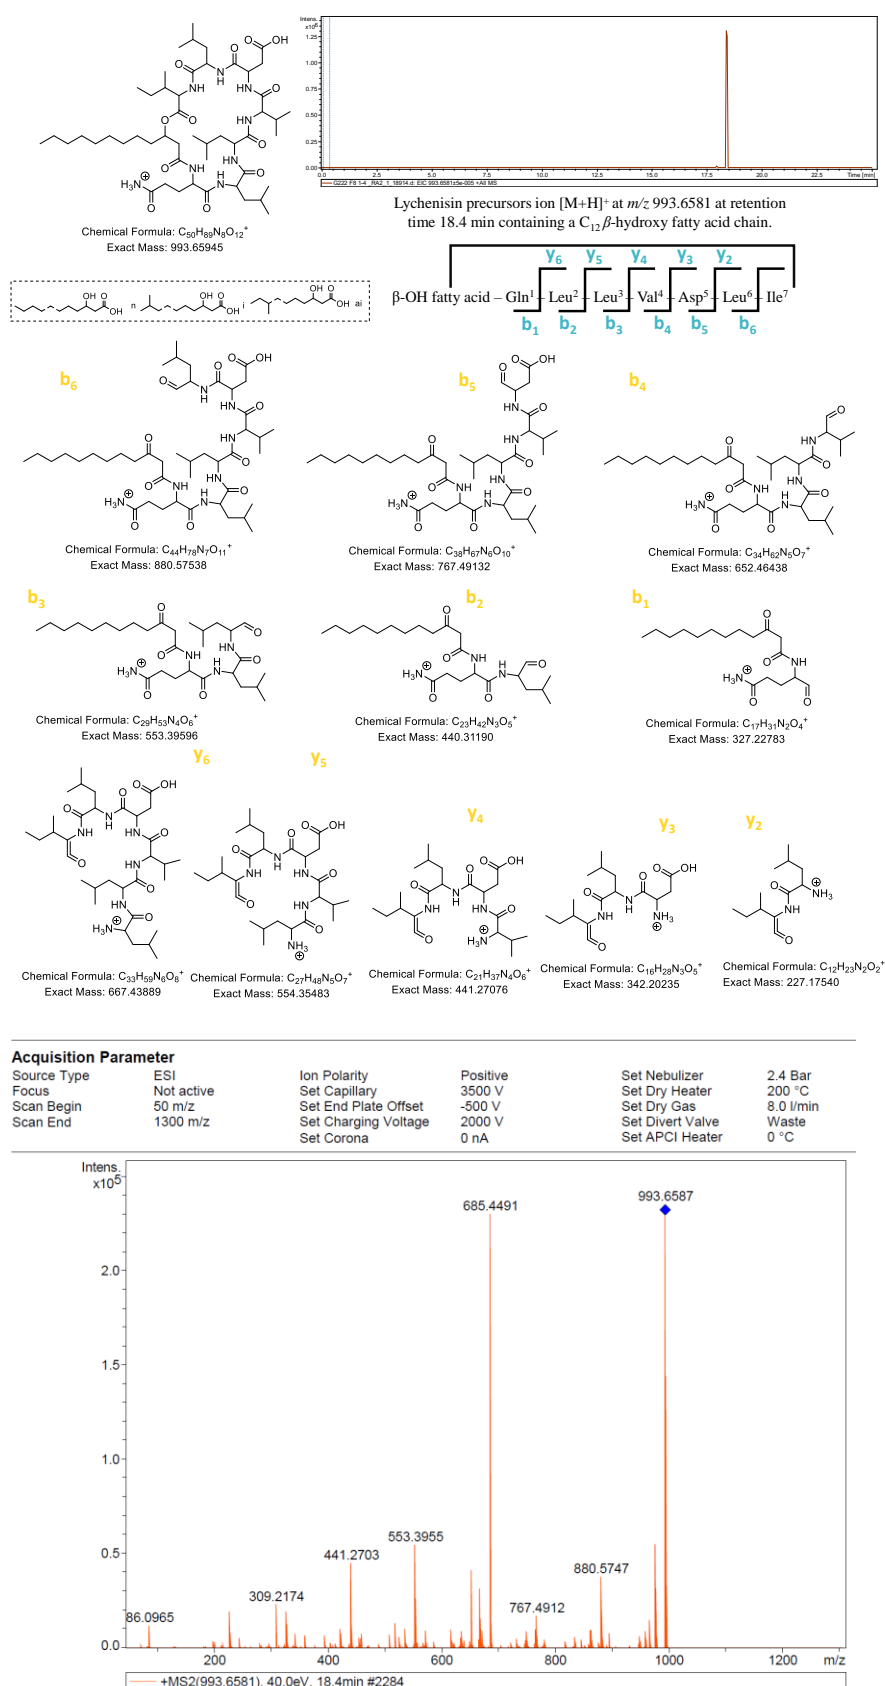

**Figure S3:** Fragmentations pattern and positive ion mode high-resolution ESI MS/MS spectrum for Lichenysin (2) ( $m/z$  993.6581  $[M+H]^+$ )

**Table S2.** Product ion spectra data for Lichenysin (**2**) ( $m/z$  993.6581  $[M + H]^+$ ).

| Product ion Assignment                                                                                                                                         | ( $m/z$ ) | Error, pm | Molecular Formula                                              |
|----------------------------------------------------------------------------------------------------------------------------------------------------------------|-----------|-----------|----------------------------------------------------------------|
| $\beta$ -OH fatty acid – Gln <sup>1</sup> – Leu <sup>2</sup> – Leu <sup>3</sup> – Val <sup>4</sup> –<br>Asp <sup>5</sup> – Leu <sup>6</sup> – Ile <sup>7</sup> | 993.6581  | -1.7      | C <sub>50</sub> H <sub>89</sub> N <sub>8</sub> O <sub>12</sub> |
| b <sub>6</sub>                                                                                                                                                 | 880.5754  | 0.8       | C <sub>44</sub> H <sub>78</sub> N <sub>7</sub> O <sub>11</sub> |
| b <sub>5</sub>                                                                                                                                                 | 767.4912  | 0.1       | C <sub>38</sub> H <sub>67</sub> N <sub>6</sub> O <sub>10</sub> |
| b <sub>4</sub>                                                                                                                                                 | 652.4641  | 0.4       | C <sub>34</sub> H <sub>62</sub> N <sub>5</sub> O <sub>7</sub>  |
| b <sub>3</sub>                                                                                                                                                 | 553.3955  | 0.9       | C <sub>29</sub> H <sub>53</sub> N <sub>4</sub> O <sub>6</sub>  |
| b <sub>2</sub>                                                                                                                                                 | 440.3115  | 1.0       | C <sub>23</sub> H <sub>42</sub> N <sub>3</sub> O <sub>5</sub>  |
| b <sub>1</sub>                                                                                                                                                 | 327.2278  | 0.5       | C <sub>17</sub> H <sub>31</sub> N <sub>2</sub> O <sub>4</sub>  |
| y <sub>6</sub>                                                                                                                                                 | 667.4386  | 0.4       | C <sub>33</sub> H <sub>59</sub> N <sub>8</sub> O <sub>6</sub>  |
| y <sub>5</sub>                                                                                                                                                 | 554.3545  | 0.6       | C <sub>27</sub> H <sub>48</sub> N <sub>5</sub> O <sub>7</sub>  |
| y <sub>4</sub>                                                                                                                                                 | 441.2703  | 1.0       | C <sub>21</sub> H <sub>37</sub> N <sub>4</sub> O <sub>6</sub>  |
| y <sub>3</sub>                                                                                                                                                 | 342.2020  | 1.1       | C <sub>16</sub> H <sub>32</sub> N <sub>5</sub> O <sub>3</sub>  |
| y <sub>2</sub>                                                                                                                                                 | 227.1754  | 0.1       | C <sub>12</sub> H <sub>23</sub> N <sub>2</sub> O <sub>2</sub>  |

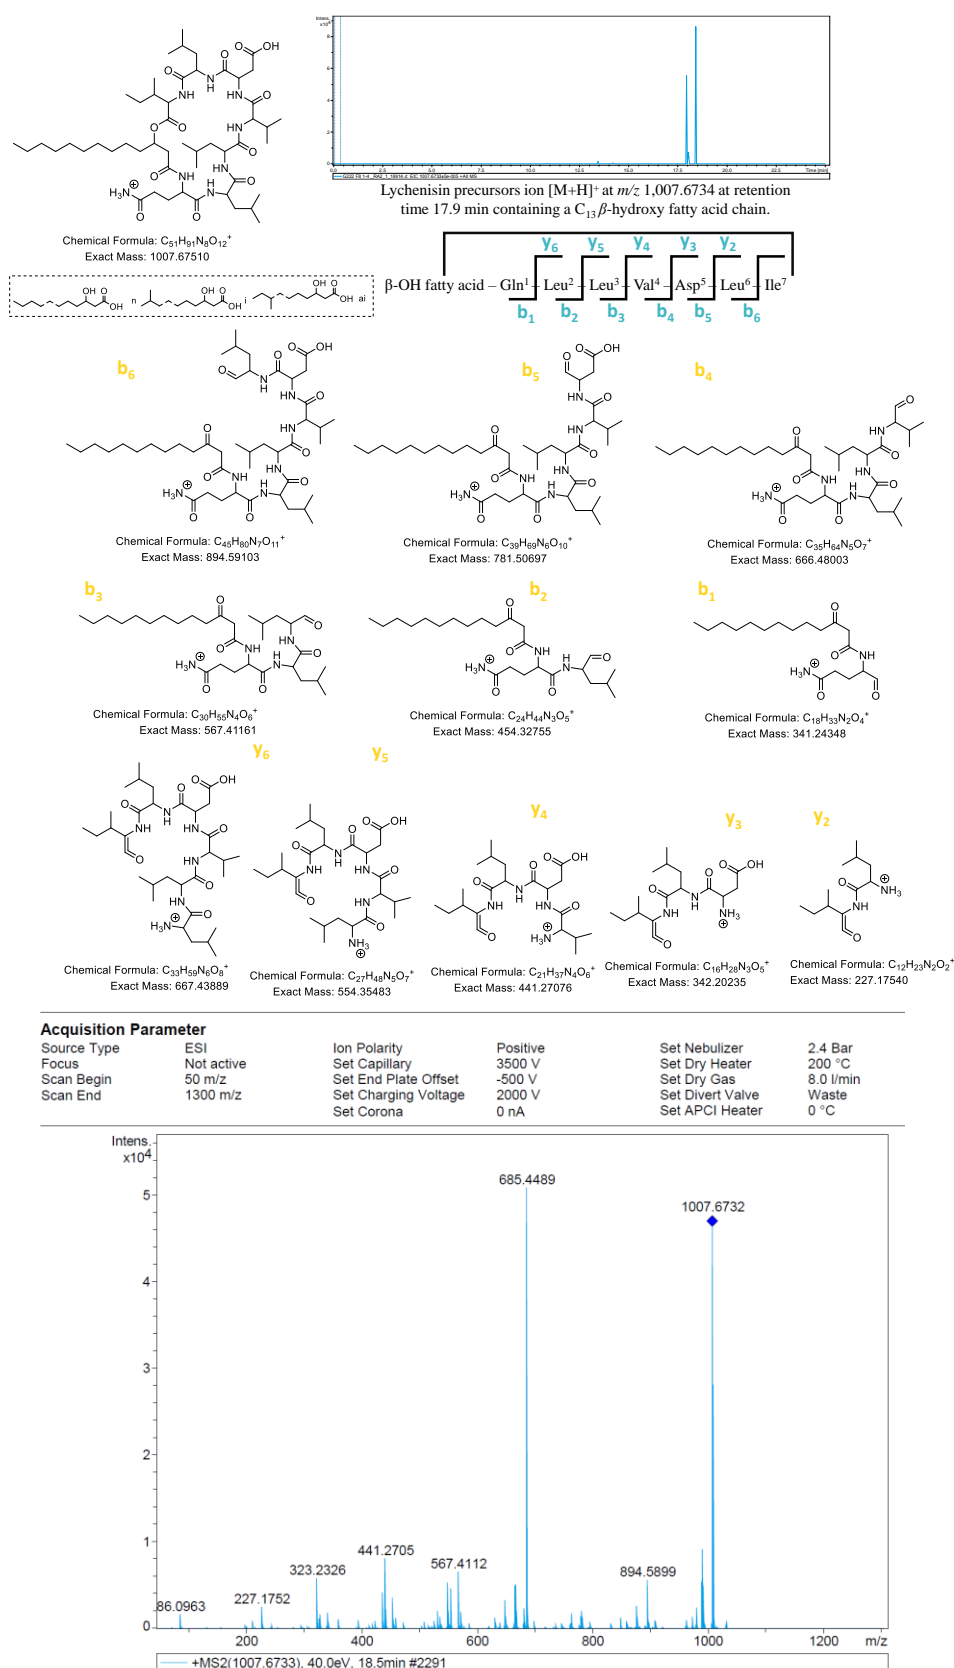

**Figure S4:** Fragmentations pattern and positive ion mode high-resolution ESI MS/MS spectrum for Lichenysin (3) ( $m/z$  1007.6734  $[M + H]^+$ )



**Table S3.** Product ion spectra data for Lichenysin (**3**) ( $m/z$  1007.6734  $[M + H]^+$ ).

| Product ion Assignment                                                                                                                                         | ( $m/z$ ) | Error, pm | Molecular Formula                                              |
|----------------------------------------------------------------------------------------------------------------------------------------------------------------|-----------|-----------|----------------------------------------------------------------|
| $\beta$ -OH fatty acid – Gln <sup>1</sup> – Leu <sup>2</sup> – Leu <sup>3</sup> – Val <sup>4</sup> –<br>Asp <sup>5</sup> – Leu <sup>6</sup> – Ile <sup>7</sup> | 1007.6734 | -1.7      | C <sub>51</sub> H <sub>91</sub> N <sub>8</sub> O <sub>12</sub> |
| b <sub>6</sub>                                                                                                                                                 | 894.5896  | 1.6       | C <sub>45</sub> H <sub>80</sub> N <sub>7</sub> O <sub>11</sub> |
| b <sub>5</sub>                                                                                                                                                 | 781.5077  | -1.0      | C <sub>39</sub> H <sub>69</sub> N <sub>6</sub> O <sub>10</sub> |
| b <sub>4</sub>                                                                                                                                                 | 666.4787  | 2.0       | C <sub>35</sub> H <sub>64</sub> N <sub>5</sub> O <sub>7</sub>  |
| b <sub>3</sub>                                                                                                                                                 | 567.4111  | 1.0       | C <sub>30</sub> H <sub>55</sub> N <sub>4</sub> O <sub>6</sub>  |
| b <sub>2</sub>                                                                                                                                                 | 454.3267  | 1.8       | C <sub>24</sub> H <sub>44</sub> N <sub>3</sub> O <sub>5</sub>  |
| b <sub>1</sub>                                                                                                                                                 | 341.2429  | 1.6       | C <sub>18</sub> H <sub>33</sub> N <sub>2</sub> O <sub>4</sub>  |
| y <sub>6</sub>                                                                                                                                                 | 667.4393  | -0.7      | C <sub>33</sub> H <sub>59</sub> N <sub>8</sub> O <sub>6</sub>  |
| y <sub>5</sub>                                                                                                                                                 | 554.3538  | 1.8       | C <sub>27</sub> H <sub>48</sub> N <sub>5</sub> O <sub>7</sub>  |
| y <sub>4</sub>                                                                                                                                                 | 441.2702  | 1.3       | C <sub>21</sub> H <sub>37</sub> N <sub>4</sub> O <sub>6</sub>  |
| y <sub>3</sub>                                                                                                                                                 | 342.2026  | -0.8      | C <sub>16</sub> H <sub>32</sub> N <sub>5</sub> O <sub>3</sub>  |
| y <sub>2</sub>                                                                                                                                                 | 227.1755  | 0.4       | C <sub>12</sub> H <sub>23</sub> N <sub>2</sub> O <sub>2</sub>  |

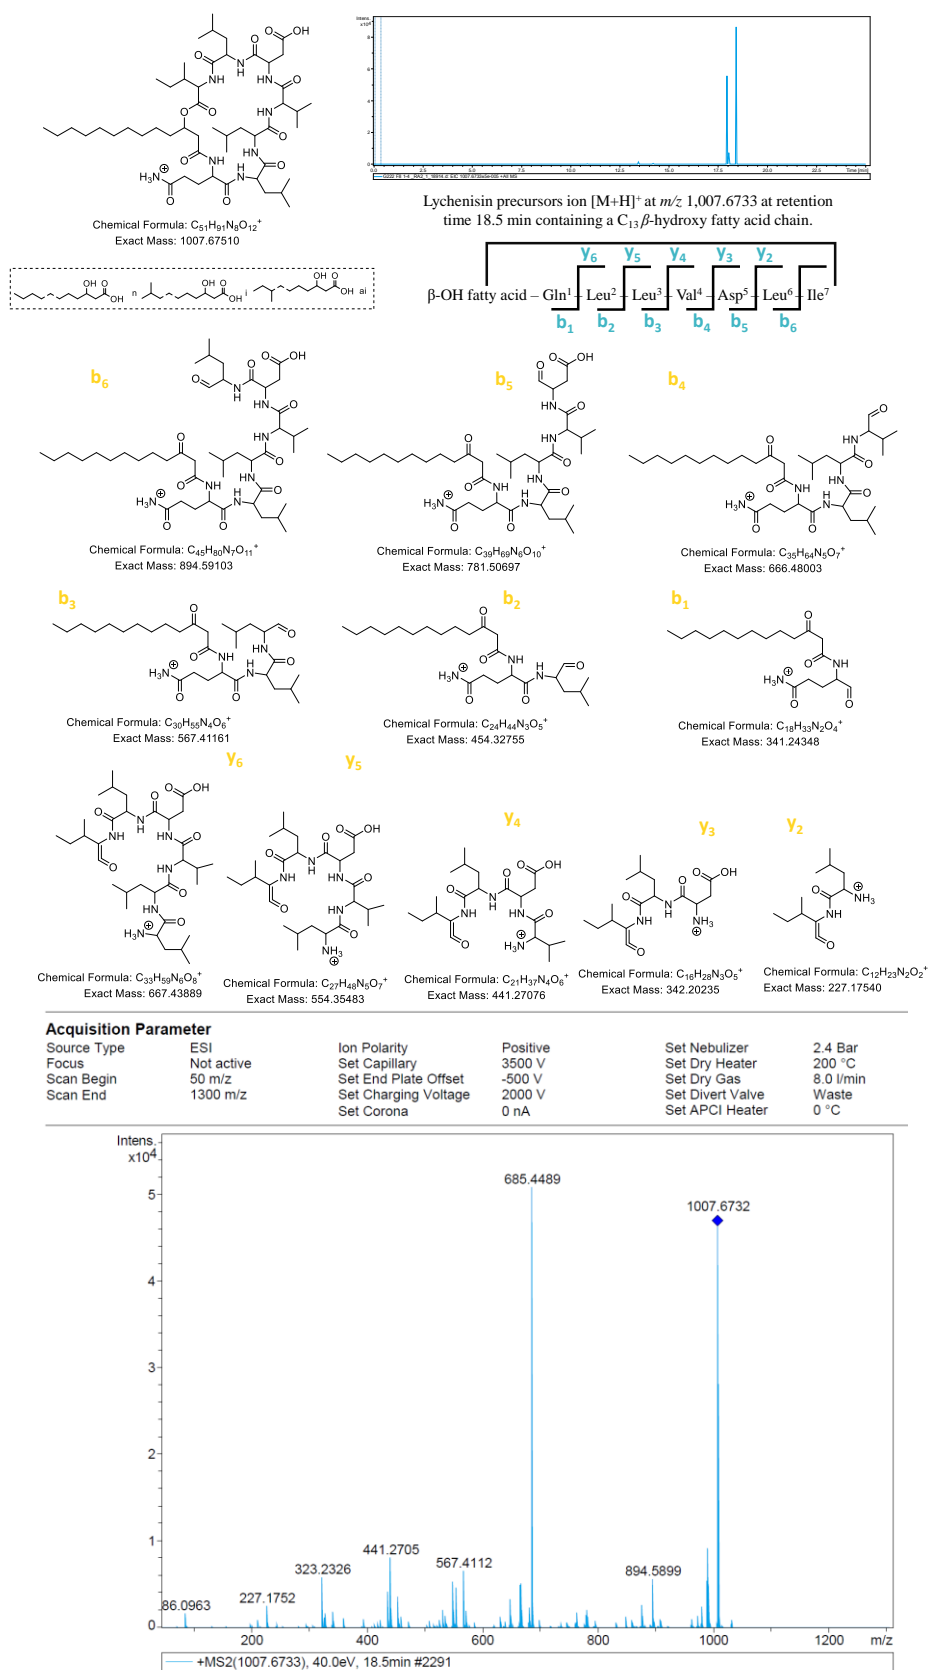

**Figure S5:** Fragmentations pattern and positive ion mode high-resolution ESI MS/MS spectrum for Lichenysin (4) (isoform of 3) ( $m/z$  1007.6733  $[M + H]^+$ )

**Table S4:** Product ion spectra data for Lichenysin (4) (isoform of 3) ( $m/z$  1007.6733  $[M + H]^+$ )

| Product ion Assignment                                                                                                                                         | ( $m/z$ ) | Error, pm | Molecular Formula                                              |
|----------------------------------------------------------------------------------------------------------------------------------------------------------------|-----------|-----------|----------------------------------------------------------------|
| $\beta$ -OH fatty acid – Gln <sup>1</sup> – Leu <sup>2</sup> – Leu <sup>3</sup> – Val <sup>4</sup> –<br>Asp <sup>5</sup> – Leu <sup>6</sup> – Ile <sup>7</sup> | 1007.6733 | -1.8      | C <sub>51</sub> H <sub>91</sub> N <sub>8</sub> O <sub>12</sub> |
| b <sub>6</sub>                                                                                                                                                 | 894.5899  | 2.7       | C <sub>45</sub> H <sub>80</sub> N <sub>7</sub> O <sub>11</sub> |
| b <sub>5</sub>                                                                                                                                                 | 781.5060  | 2.9       | C <sub>39</sub> H <sub>69</sub> N <sub>6</sub> O <sub>10</sub> |
| b <sub>4</sub>                                                                                                                                                 | 666.4793  | 1.1       | C <sub>35</sub> H <sub>64</sub> N <sub>5</sub> O <sub>7</sub>  |
| b <sub>3</sub>                                                                                                                                                 | 567.4116  | 0.8       | C <sub>30</sub> H <sub>55</sub> N <sub>4</sub> O <sub>6</sub>  |
| b <sub>2</sub>                                                                                                                                                 | 454.3265  | 2.2       | C <sub>24</sub> H <sub>44</sub> N <sub>3</sub> O <sub>5</sub>  |
| b <sub>1</sub>                                                                                                                                                 | 341.2431  | 1.2       | C <sub>18</sub> H <sub>33</sub> N <sub>2</sub> O <sub>4</sub>  |
| y <sub>6</sub>                                                                                                                                                 | 667.4389  | 0.2       | C <sub>33</sub> H <sub>59</sub> N <sub>8</sub> O <sub>6</sub>  |
| y <sub>5</sub>                                                                                                                                                 | 554.3540  | -0.9      | C <sub>27</sub> H <sub>48</sub> N <sub>5</sub> O <sub>7</sub>  |
| y <sub>4</sub>                                                                                                                                                 | 441.2705  | 0.7       | C <sub>21</sub> H <sub>37</sub> N <sub>4</sub> O <sub>6</sub>  |
| y <sub>3</sub>                                                                                                                                                 | 342.2018  | 1.6       | C <sub>16</sub> H <sub>32</sub> N <sub>5</sub> O <sub>3</sub>  |
| y <sub>2</sub>                                                                                                                                                 | 227.1752  | 0.8       | C <sub>12</sub> H <sub>23</sub> N <sub>2</sub> O <sub>2</sub>  |

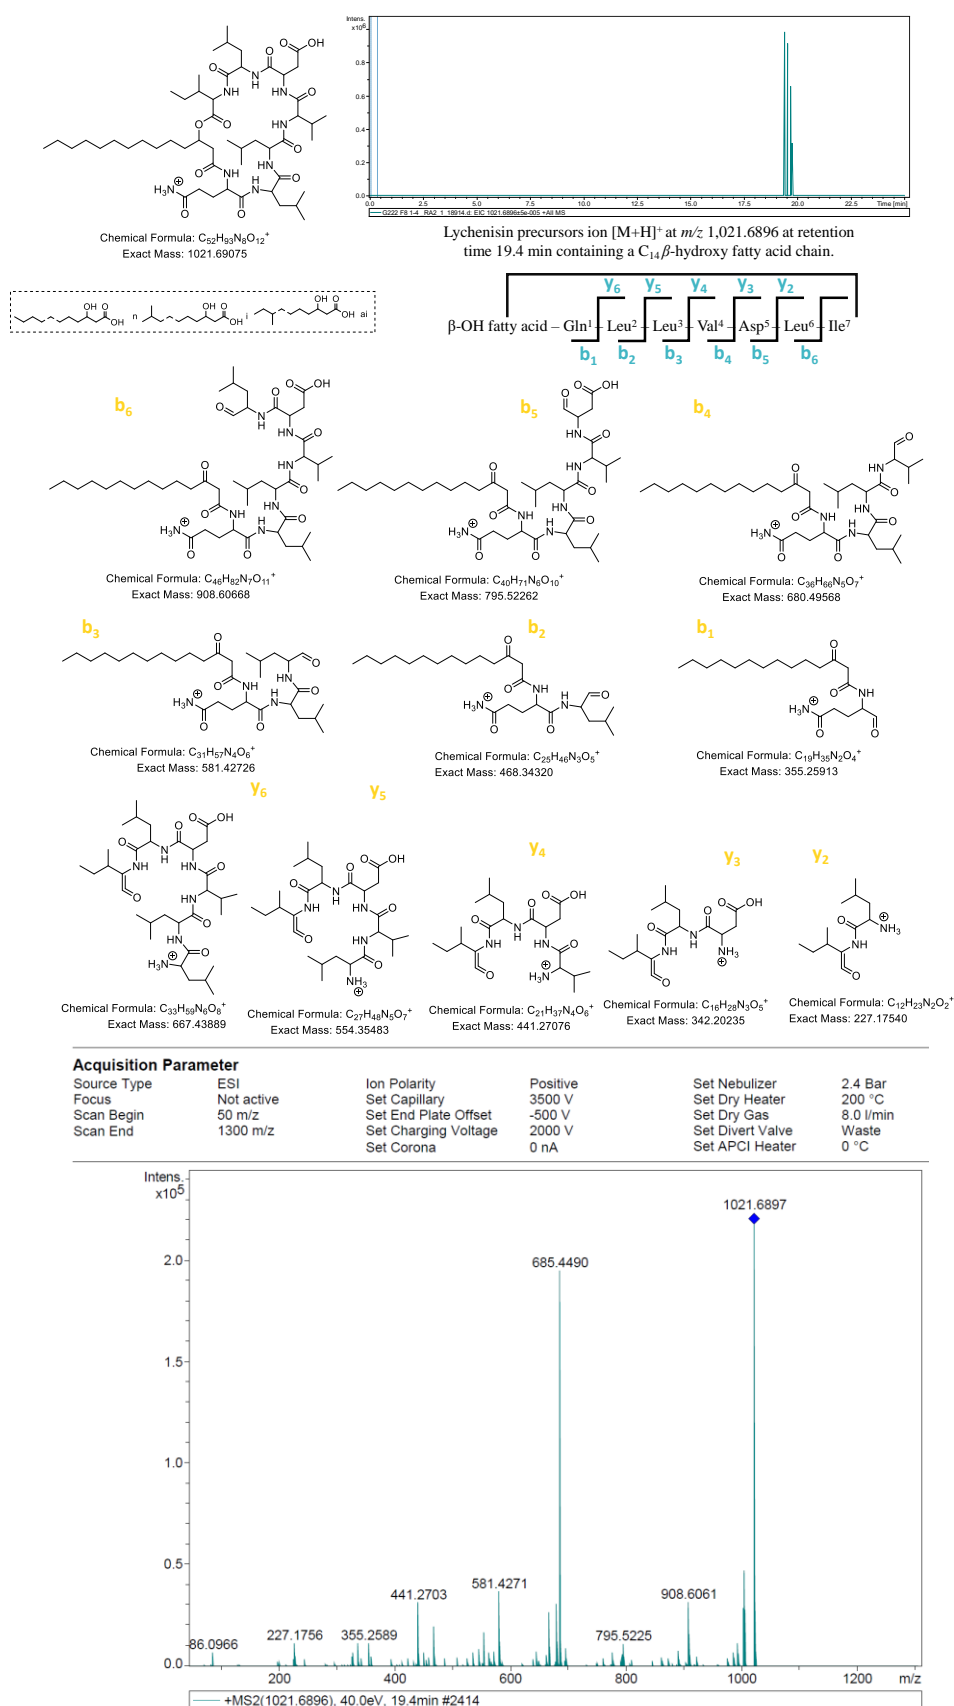

**Figure S6:** Fragmentations pattern and positive ion mode high-resolution ESI MS/MS spectrum for Lichenysin (5) ( $m/z$  1021.6896  $[M + H]^+$ )

**Table S5:** Product ion spectra data for Lichenysin (5) ( $m/z$  1021.6896  $[M + H]^+$ )

| Product ion Assignment                                                                                                                                         | ( $m/z$ ) | Error, pm | Molecular Formula                                              |
|----------------------------------------------------------------------------------------------------------------------------------------------------------------|-----------|-----------|----------------------------------------------------------------|
| $\beta$ -OH fatty acid – Gln <sup>1</sup> – Leu <sup>2</sup> – Leu <sup>3</sup> – Val <sup>4</sup> –<br>Asp <sup>5</sup> – Leu <sup>6</sup> – Ile <sup>7</sup> | 1021.6896 | -0.01     | C <sub>52</sub> H <sub>93</sub> N <sub>8</sub> O <sub>12</sub> |
| b <sub>6</sub>                                                                                                                                                 | 908.6061  | 0.6       | C <sub>46</sub> H <sub>82</sub> N <sub>7</sub> O <sub>11</sub> |
| b <sub>5</sub>                                                                                                                                                 | 795.5225  | 0.2       | C <sub>40</sub> H <sub>71</sub> N <sub>6</sub> O <sub>10</sub> |
| b <sub>4</sub>                                                                                                                                                 | 680.4950  | 1.0       | C <sub>36</sub> H <sub>66</sub> N <sub>5</sub> O <sub>7</sub>  |
| b <sub>3</sub>                                                                                                                                                 | 581.4271  | 0.3       | C <sub>31</sub> H <sub>57</sub> N <sub>4</sub> O <sub>6</sub>  |
| b <sub>2</sub>                                                                                                                                                 | 468.3427  | 1.0       | C <sub>25</sub> H <sub>46</sub> N <sub>3</sub> O <sub>5</sub>  |
| b <sub>1</sub>                                                                                                                                                 | 355.2589  | 0.6       | C <sub>19</sub> H <sub>35</sub> N <sub>2</sub> O <sub>4</sub>  |
| y <sub>6</sub>                                                                                                                                                 | 667.4388  | 0.2       | C <sub>33</sub> H <sub>59</sub> N <sub>8</sub> O <sub>6</sub>  |
| y <sub>5</sub>                                                                                                                                                 | 554.3547  | 0.2       | C <sub>27</sub> H <sub>48</sub> N <sub>5</sub> O <sub>7</sub>  |
| y <sub>4</sub>                                                                                                                                                 | 441.2703  | 1.1       | C <sub>21</sub> H <sub>37</sub> N <sub>4</sub> O <sub>6</sub>  |
| y <sub>3</sub>                                                                                                                                                 | 342.2022  | 0.5       | C <sub>16</sub> H <sub>32</sub> N <sub>5</sub> O <sub>3</sub>  |
| y <sub>2</sub>                                                                                                                                                 | 227.1756  | -0.8      | C <sub>12</sub> H <sub>23</sub> N <sub>2</sub> O <sub>2</sub>  |

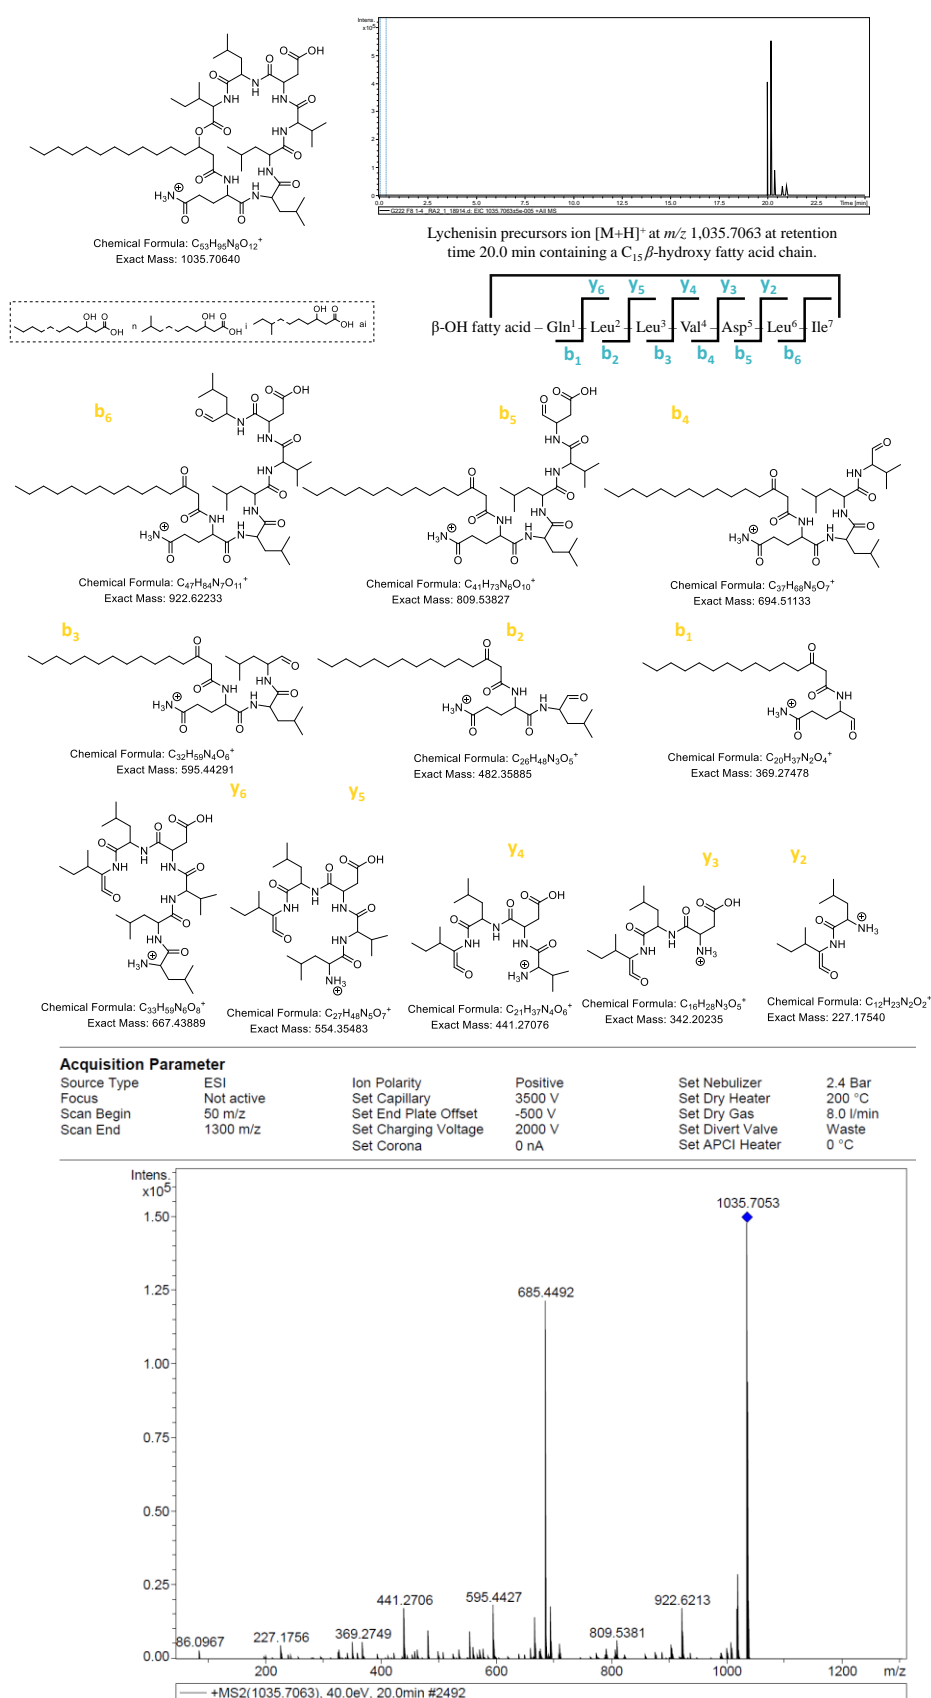

**Figure S7:** Fragmentations pattern and positive ion mode high-resolution ESI MS/MS spectrum for Lichenysin (6) ( $m/z$  1035.7063  $[M + H]^+$ )

**Table S6.** Product ion spectra data for Lichenysin (**6**) ( $m/z$  1035.7063 [M + H]<sup>+</sup>).

| Product ion Assignment                                                                                                                                         | ( $m/z$ ) | Error, pm | Molecular Formula                                              |
|----------------------------------------------------------------------------------------------------------------------------------------------------------------|-----------|-----------|----------------------------------------------------------------|
| $\beta$ -OH fatty acid – Gln <sup>1</sup> – Leu <sup>2</sup> – Leu <sup>3</sup> – Val <sup>4</sup> –<br>Asp <sup>5</sup> – Leu <sup>6</sup> – Ile <sup>7</sup> | 1035.7063 | -0.01     | C <sub>53</sub> H <sub>95</sub> N <sub>8</sub> O <sub>12</sub> |
| b <sub>6</sub>                                                                                                                                                 | 922.6213  | 1.1       | C <sub>47</sub> H <sub>84</sub> N <sub>7</sub> O <sub>11</sub> |
| b <sub>5</sub>                                                                                                                                                 | 809.5381  | 0.2       | C <sub>41</sub> H <sub>73</sub> N <sub>6</sub> O <sub>10</sub> |
| b <sub>4</sub>                                                                                                                                                 | 694.5113  | 0.4       | C <sub>37</sub> H <sub>68</sub> N <sub>5</sub> O <sub>7</sub>  |
| b <sub>3</sub>                                                                                                                                                 | 595.4427  | 0.3       | C <sub>32</sub> H <sub>59</sub> N <sub>4</sub> O <sub>6</sub>  |
| b <sub>2</sub>                                                                                                                                                 | 482.3585  | 0.8       | C <sub>26</sub> H <sub>48</sub> N <sub>3</sub> O <sub>5</sub>  |
| b <sub>1</sub>                                                                                                                                                 | 369.2749  | -0.2      | C <sub>20</sub> H <sub>37</sub> N <sub>2</sub> O <sub>4</sub>  |
| y <sub>6</sub>                                                                                                                                                 | 667.4391  | -0.3      | C <sub>33</sub> H <sub>59</sub> N <sub>8</sub> O <sub>6</sub>  |
| y <sub>5</sub>                                                                                                                                                 | 554.3545  | 0.5       | C <sub>27</sub> H <sub>48</sub> N <sub>5</sub> O <sub>7</sub>  |
| y <sub>4</sub>                                                                                                                                                 | 441.2706  | 0.4       | C <sub>21</sub> H <sub>37</sub> N <sub>4</sub> O <sub>6</sub>  |
| y <sub>3</sub>                                                                                                                                                 | 342.2026  | -0.6      | C <sub>16</sub> H <sub>32</sub> N <sub>5</sub> O <sub>3</sub>  |
| y <sub>2</sub>                                                                                                                                                 | 227.1756  | -0.7      | C <sub>12</sub> H <sub>23</sub> N <sub>2</sub> O <sub>2</sub>  |

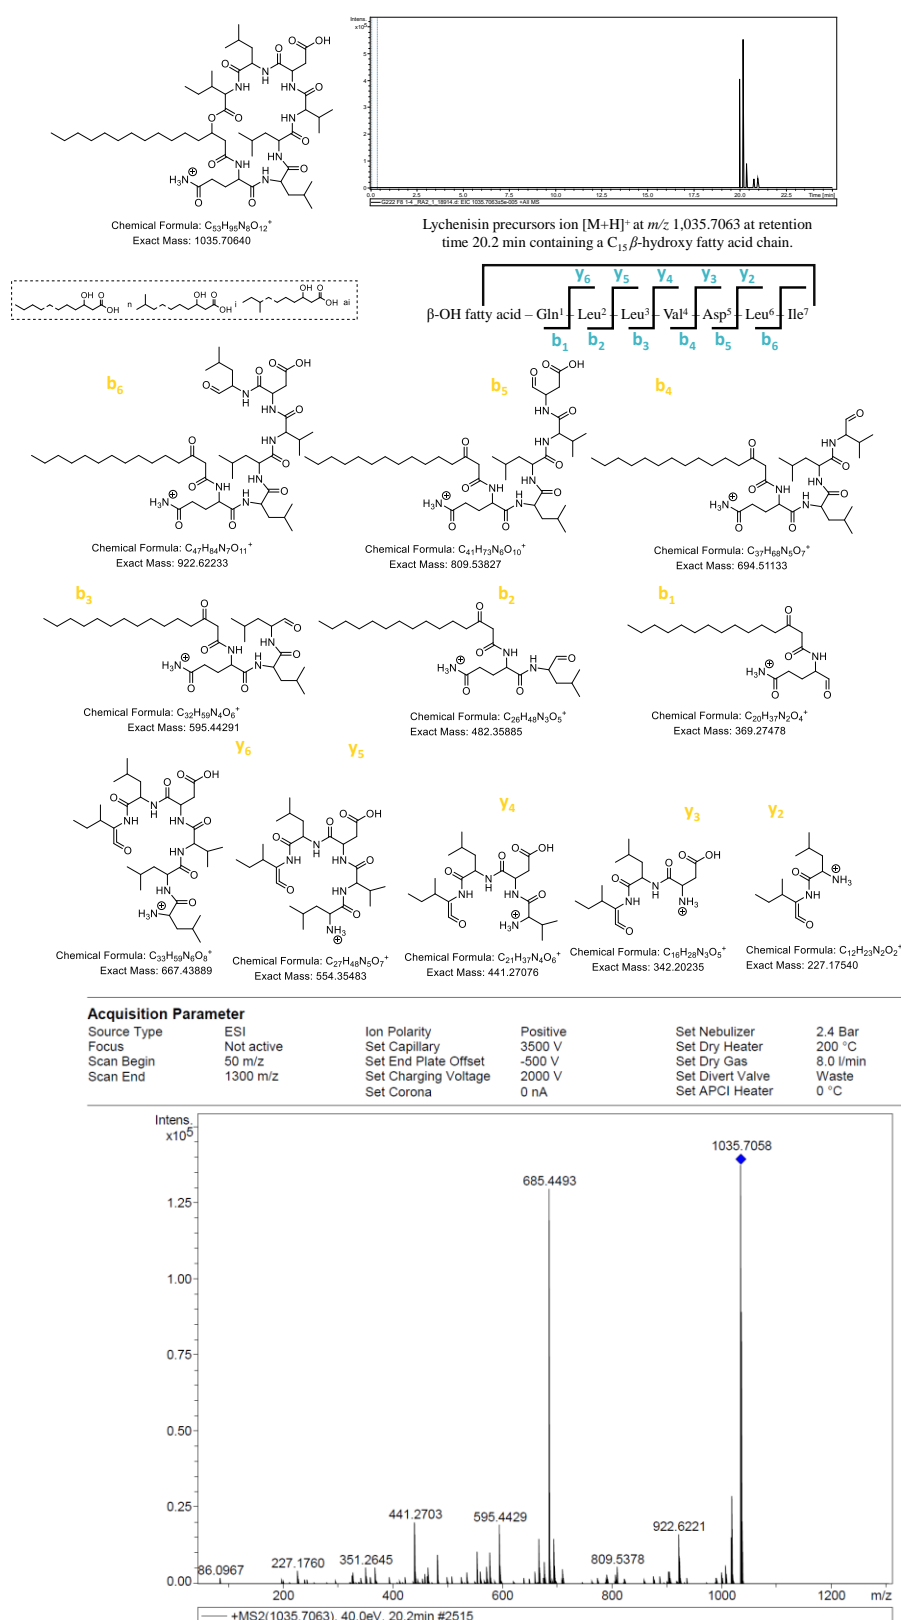

**Figure S8:** Fragmentations pattern and positive ion mode high-resolution ESI MS/MS spectrum for Lichenysin (7) (isoform of 6) ( $m/z$  1035.7063  $[M + H]^+$ )



**Table S7.** Product ion spectra data Lichenysin (7) (isoform of 6) ( $m/z$  1035.7063  $[M + H]^+$ ).

| Product ion Assignment                                                                                                                                         | ( $m/z$ ) | Error, pm | Molecular Formula                                              |
|----------------------------------------------------------------------------------------------------------------------------------------------------------------|-----------|-----------|----------------------------------------------------------------|
| $\beta$ -OH fatty acid – Gln <sup>1</sup> – Leu <sup>2</sup> – Leu <sup>3</sup> – Val <sup>4</sup> –<br>Asp <sup>5</sup> – Leu <sup>6</sup> – Ile <sup>7</sup> | 1035.7063 | -0.01     | C <sub>53</sub> H <sub>95</sub> N <sub>8</sub> O <sub>12</sub> |
| b <sub>6</sub>                                                                                                                                                 | 922.6221  | 0.2       | C <sub>47</sub> H <sub>84</sub> N <sub>7</sub> O <sub>11</sub> |
| b <sub>5</sub>                                                                                                                                                 | 809.5378  | 0.6       | C <sub>41</sub> H <sub>73</sub> N <sub>6</sub> O <sub>10</sub> |
| b <sub>4</sub>                                                                                                                                                 | 694.5109  | 0.6       | C <sub>37</sub> H <sub>68</sub> N <sub>5</sub> O <sub>7</sub>  |
| b <sub>3</sub>                                                                                                                                                 | 595.4429  | 0.0       | C <sub>32</sub> H <sub>59</sub> N <sub>4</sub> O <sub>6</sub>  |
| b <sub>2</sub>                                                                                                                                                 | 482.3589  | 0.0       | C <sub>26</sub> H <sub>48</sub> N <sub>3</sub> O <sub>5</sub>  |
| b <sub>1</sub>                                                                                                                                                 | 369.2748  | 0.0       | C <sub>20</sub> H <sub>37</sub> N <sub>2</sub> O <sub>4</sub>  |
| y <sub>6</sub>                                                                                                                                                 | 667.4388  | 0.1       | C <sub>33</sub> H <sub>59</sub> N <sub>8</sub> O <sub>6</sub>  |
| y <sub>5</sub>                                                                                                                                                 | 554.3552  | -0.6      | C <sub>27</sub> H <sub>48</sub> N <sub>5</sub> O <sub>7</sub>  |
| y <sub>4</sub>                                                                                                                                                 | 441.2703  | 1.0       | C <sub>21</sub> H <sub>37</sub> N <sub>4</sub> O <sub>6</sub>  |
| y <sub>3</sub>                                                                                                                                                 | 342.2025  | -0.5      | C <sub>16</sub> H <sub>32</sub> N <sub>5</sub> O <sub>3</sub>  |
| y <sub>2</sub>                                                                                                                                                 | 227.1760  | -2.5      | C <sub>12</sub> H <sub>23</sub> N <sub>2</sub> O <sub>2</sub>  |

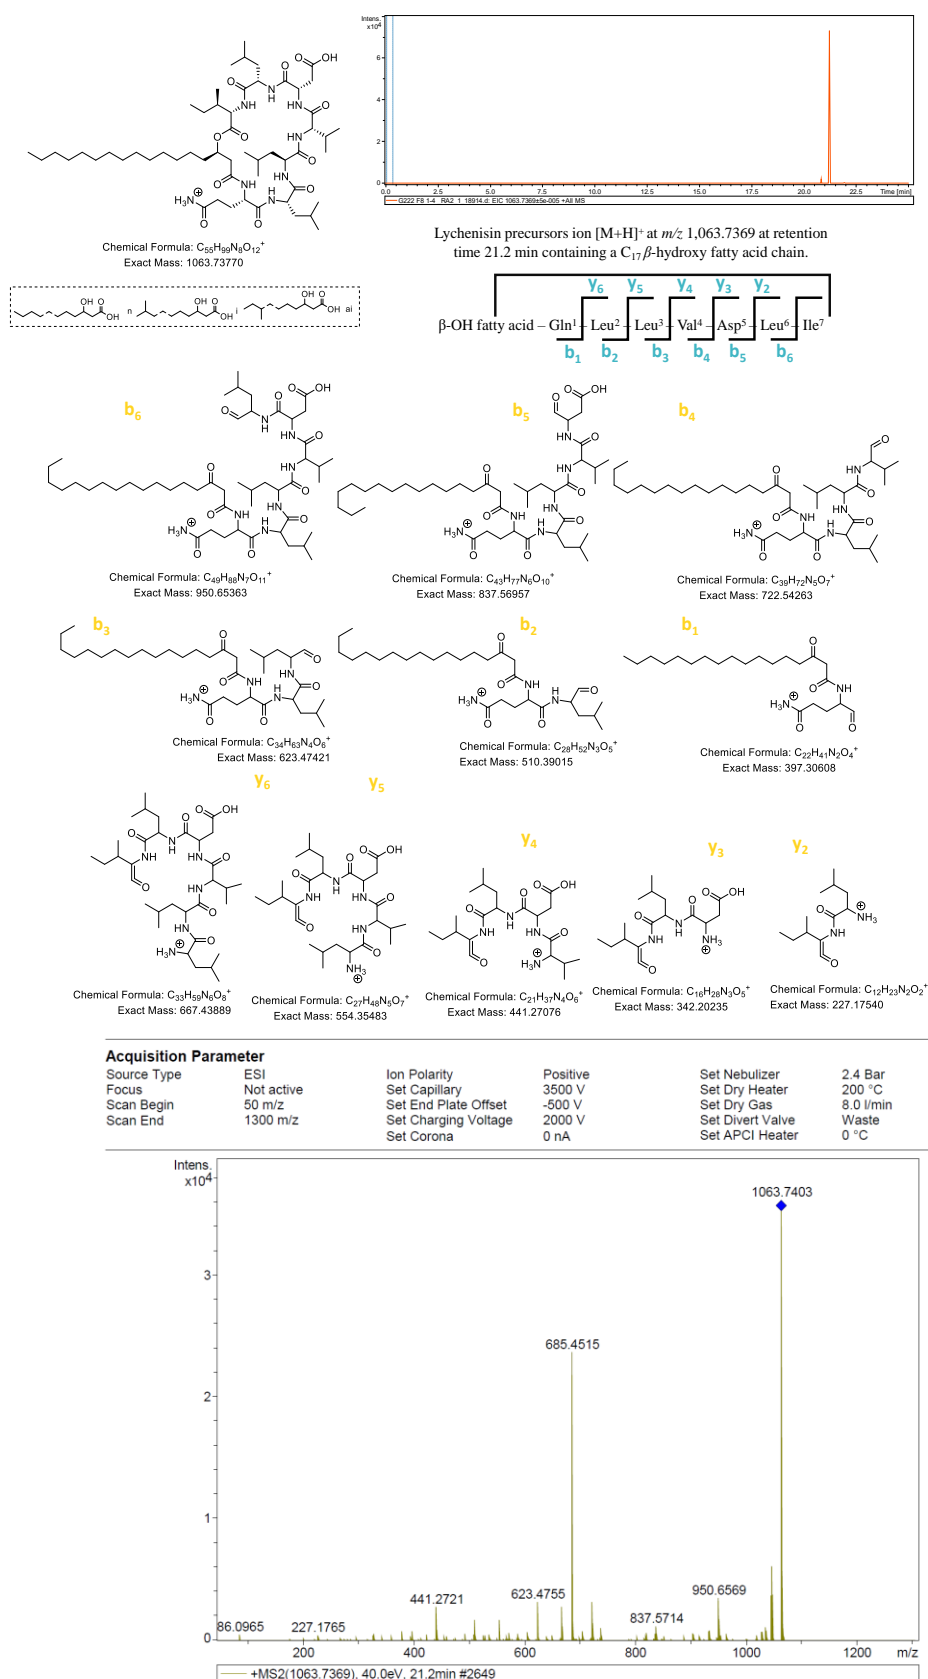

**Figure S9:** Fragmentations pattern and positive ion mode high-resolution ESI MS/MS spectrum for Lichenysin (8) ( $m/z$  1063.7366  $[M + H]^+$ )

**Table S8.** Product ion spectra data Lichenysin (8) ( $m/z$  1063.7366  $[M + H]^+$ ).

| Product ion Assignment                                                                                                                                         | ( $m/z$ ) | Error, pm | Molecular Formula                                              |
|----------------------------------------------------------------------------------------------------------------------------------------------------------------|-----------|-----------|----------------------------------------------------------------|
| $\beta$ -OH fatty acid – Gln <sup>1</sup> – Leu <sup>2</sup> – Leu <sup>3</sup> – Val <sup>4</sup> –<br>Asp <sup>5</sup> – Leu <sup>6</sup> – Ile <sup>7</sup> | 1063.7366 | -1.0      | C <sub>55</sub> H <sub>99</sub> N <sub>8</sub> O <sub>12</sub> |
| b <sub>6</sub>                                                                                                                                                 | 950.6569  | -3.4      | C <sub>49</sub> H <sub>88</sub> N <sub>7</sub> O <sub>11</sub> |
| b <sub>5</sub>                                                                                                                                                 | 837.5714  | -0.6      | C <sub>43</sub> H <sub>77</sub> N <sub>6</sub> O <sub>10</sub> |
| b <sub>4</sub>                                                                                                                                                 | 722.5448  | -3.1      | C <sub>39</sub> H <sub>72</sub> N <sub>5</sub> O <sub>7</sub>  |
| b <sub>3</sub>                                                                                                                                                 | 623.4755  | -2.1      | C <sub>34</sub> H <sub>63</sub> N <sub>4</sub> O <sub>6</sub>  |
| b <sub>2</sub>                                                                                                                                                 | 510.3915  | -2.7      | C <sub>28</sub> H <sub>52</sub> N <sub>3</sub> O <sub>5</sub>  |
| b <sub>1</sub>                                                                                                                                                 | 397.3070  | -2.4      | C <sub>22</sub> H <sub>41</sub> N <sub>2</sub> O <sub>4</sub>  |
| y <sub>6</sub>                                                                                                                                                 | 667.4414  | 2.2       | C <sub>33</sub> H <sub>59</sub> N <sub>8</sub> O <sub>6</sub>  |
| y <sub>5</sub>                                                                                                                                                 | 554.3564  | -2.8      | C <sub>27</sub> H <sub>48</sub> N <sub>5</sub> O <sub>7</sub>  |
| y <sub>4</sub>                                                                                                                                                 | 441.2721  | -2.1      | C <sub>21</sub> H <sub>37</sub> N <sub>4</sub> O <sub>6</sub>  |
| y <sub>3</sub>                                                                                                                                                 | 342.2044  | -6.0      | C <sub>16</sub> H <sub>32</sub> N <sub>5</sub> O <sub>3</sub>  |
| y <sub>2</sub>                                                                                                                                                 | 227.1765  | -4.8      | C <sub>12</sub> H <sub>23</sub> N <sub>2</sub> O <sub>2</sub>  |

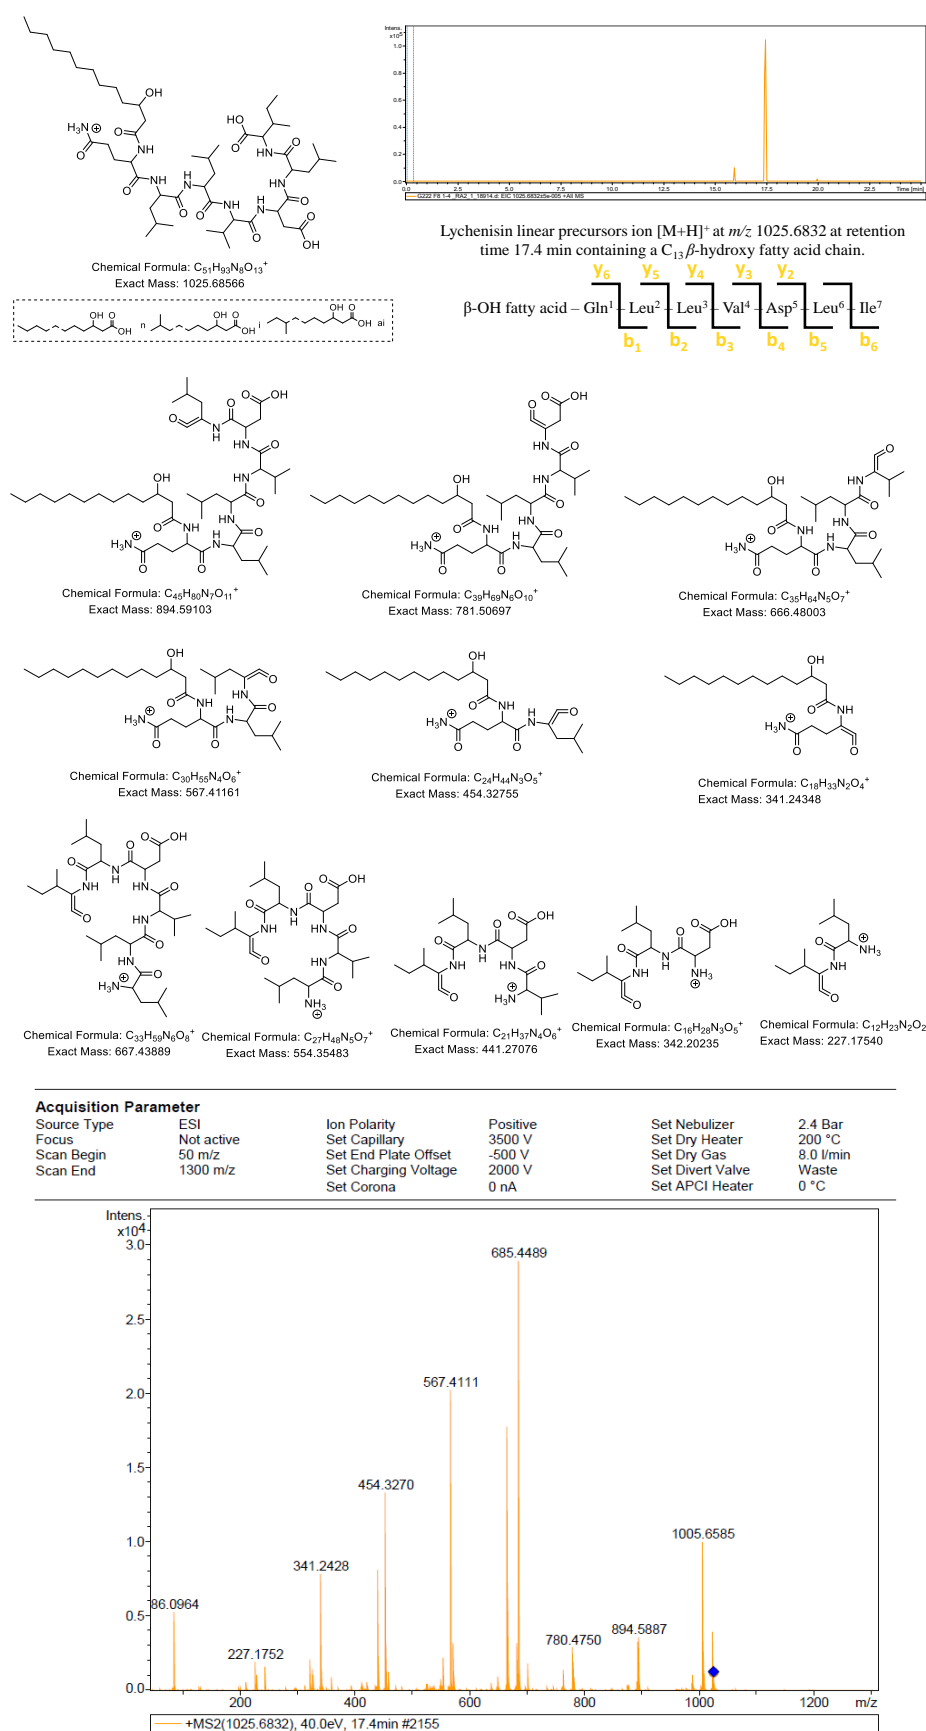

**Figure S10.** Fragmentations pattern and positive ion mode high-resolution ESI MS/MS spectrum for linear Lichenysin (9) ( $m/z$  1025.6832  $[M + H]^+$ ).

**Table S9.** Product ion spectra data for Lichenysin (**9**) ( $m/z$  1025.6832  $[M + H]^+$ ).

| Product ion Assignment                                                                                                                                         | ( $m/z$ ) | Error, pm | Molecular Formula                                              |
|----------------------------------------------------------------------------------------------------------------------------------------------------------------|-----------|-----------|----------------------------------------------------------------|
| $\beta$ -OH fatty acid – Gln <sup>1</sup> – Leu <sup>2</sup> – Leu <sup>3</sup> – Val <sup>4</sup> –<br>Asp <sup>5</sup> – Leu <sup>6</sup> – Ile <sup>7</sup> | 1025.6832 | -2.4      | C <sub>51</sub> H <sub>93</sub> N <sub>8</sub> O <sub>13</sub> |
| b <sub>6</sub>                                                                                                                                                 | 894.5887  | 2.6       | C <sub>45</sub> H <sub>80</sub> N <sub>7</sub> O <sub>11</sub> |
| b <sub>5</sub>                                                                                                                                                 | 781.5056  | 1.7       | C <sub>39</sub> H <sub>69</sub> N <sub>6</sub> O <sub>10</sub> |
| b <sub>4</sub>                                                                                                                                                 | 666.4797  | 0.5       | C <sub>35</sub> H <sub>64</sub> N <sub>5</sub> O <sub>7</sub>  |
| b <sub>3</sub>                                                                                                                                                 | 567.4111  | 0.9       | C <sub>30</sub> H <sub>55</sub> N <sub>4</sub> O <sub>6</sub>  |
| b <sub>2</sub>                                                                                                                                                 | 454.3270  | 1.2       | C <sub>24</sub> H <sub>44</sub> N <sub>3</sub> O <sub>5</sub>  |
| b <sub>1</sub>                                                                                                                                                 | 341.2428  | 2.1       | C <sub>18</sub> H <sub>33</sub> N <sub>2</sub> O <sub>4</sub>  |
| y <sub>6</sub>                                                                                                                                                 | 667.4831  | 5.1       | C <sub>33</sub> H <sub>59</sub> N <sub>8</sub> O <sub>6</sub>  |
| y <sub>5</sub>                                                                                                                                                 | 554.3541  | 1.4       | C <sub>27</sub> H <sub>48</sub> N <sub>5</sub> O <sub>7</sub>  |
| y <sub>4</sub>                                                                                                                                                 | 441.2701  | 1.5       | C <sub>21</sub> H <sub>37</sub> N <sub>4</sub> O <sub>6</sub>  |
| y <sub>3</sub>                                                                                                                                                 | 342.2459  | 12.0      | C <sub>16</sub> H <sub>32</sub> N <sub>5</sub> O <sub>3</sub>  |
| y <sub>2</sub>                                                                                                                                                 | 227.1752  | 0.7       | C <sub>12</sub> H <sub>23</sub> N <sub>2</sub> O <sub>2</sub>  |

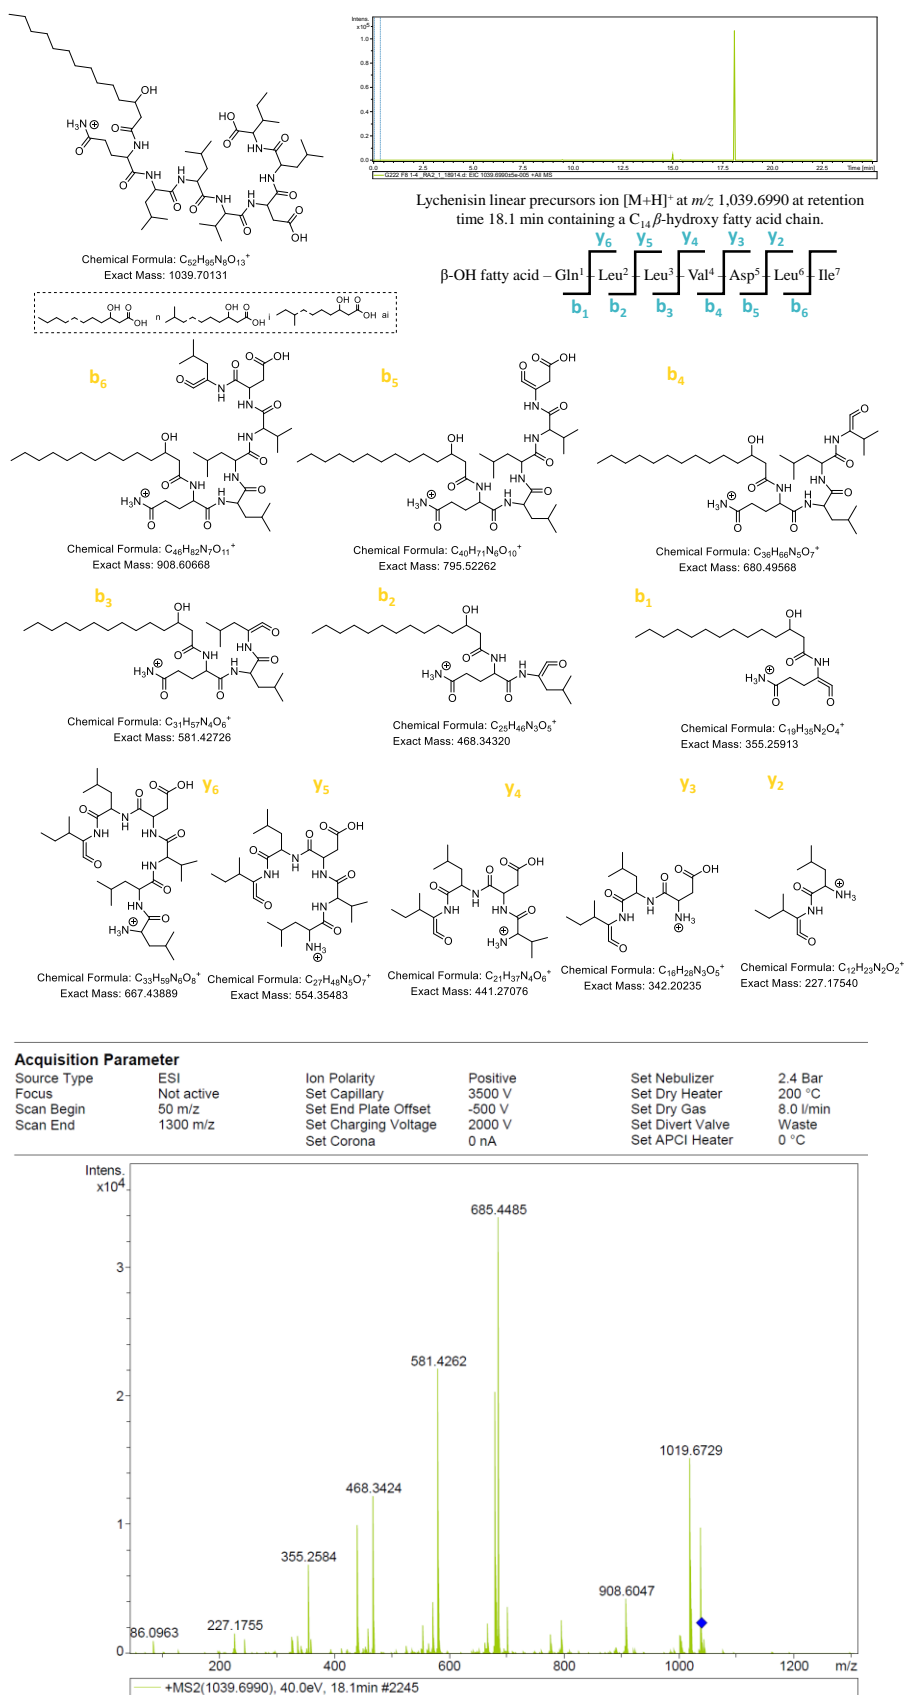

**Figure S11:** Fragmentations pattern and positive ion mode high-resolution ESI MS/MS spectrum for linear Lichenysin (10) ( $m/z$  1039.6990  $[M+H]^+$ )

**Table S10.** Product ion spectra data for Linear Lichenysin (**10**) ( $m/z$  1039.6990  $[M + H]^+$ ).

| Product ion Assignment                                                                                                                                         | ( $m/z$ ) | Error, pm | Molecular Formula                                              |
|----------------------------------------------------------------------------------------------------------------------------------------------------------------|-----------|-----------|----------------------------------------------------------------|
| $\beta$ -OH fatty acid – Gln <sup>1</sup> – Leu <sup>2</sup> – Leu <sup>3</sup> – Val <sup>4</sup> –<br>Asp <sup>5</sup> – Leu <sup>6</sup> – Ile <sup>7</sup> | 1039.6990 | -2.22     | C <sub>52</sub> H <sub>95</sub> N <sub>8</sub> O <sub>13</sub> |
| b <sub>6</sub>                                                                                                                                                 | 908.6047  | 2.1       | C <sub>46</sub> H <sub>82</sub> N <sub>7</sub> O <sub>11</sub> |
| b <sub>5</sub>                                                                                                                                                 | 795.5204  | 2.8       | C <sub>40</sub> H <sub>71</sub> N <sub>6</sub> O <sub>10</sub> |
| b <sub>4</sub>                                                                                                                                                 | 680.4947  | 1.4       | C <sub>36</sub> H <sub>66</sub> N <sub>5</sub> O <sub>7</sub>  |
| b <sub>3</sub>                                                                                                                                                 | 581.4262  | 1.8       | C <sub>31</sub> H <sub>57</sub> N <sub>4</sub> O <sub>6</sub>  |
| b <sub>2</sub>                                                                                                                                                 | 468.3424  | 1.8       | C <sub>25</sub> H <sub>46</sub> N <sub>3</sub> O <sub>5</sub>  |
| b <sub>1</sub>                                                                                                                                                 | 355.2584  | 2.5       | C <sub>18</sub> H <sub>33</sub> N <sub>2</sub> O <sub>4</sub>  |
| y <sub>6</sub>                                                                                                                                                 | 667.4383  | 0.8       | C <sub>33</sub> H <sub>59</sub> N <sub>8</sub> O <sub>6</sub>  |
| y <sub>5</sub>                                                                                                                                                 | 554.3537  | 2.0       | C <sub>27</sub> H <sub>48</sub> N <sub>5</sub> O <sub>7</sub>  |
| y <sub>4</sub>                                                                                                                                                 | 441.2698  | 2.2       | C <sub>21</sub> H <sub>37</sub> N <sub>4</sub> O <sub>6</sub>  |
| y <sub>3</sub>                                                                                                                                                 | 342.2024  | -0.1      | C <sub>19</sub> H <sub>35</sub> N <sub>5</sub> O <sub>3</sub>  |
| y <sub>2</sub>                                                                                                                                                 | 227.1755  | -0.3      | C <sub>12</sub> H <sub>23</sub> N <sub>2</sub> O <sub>2</sub>  |

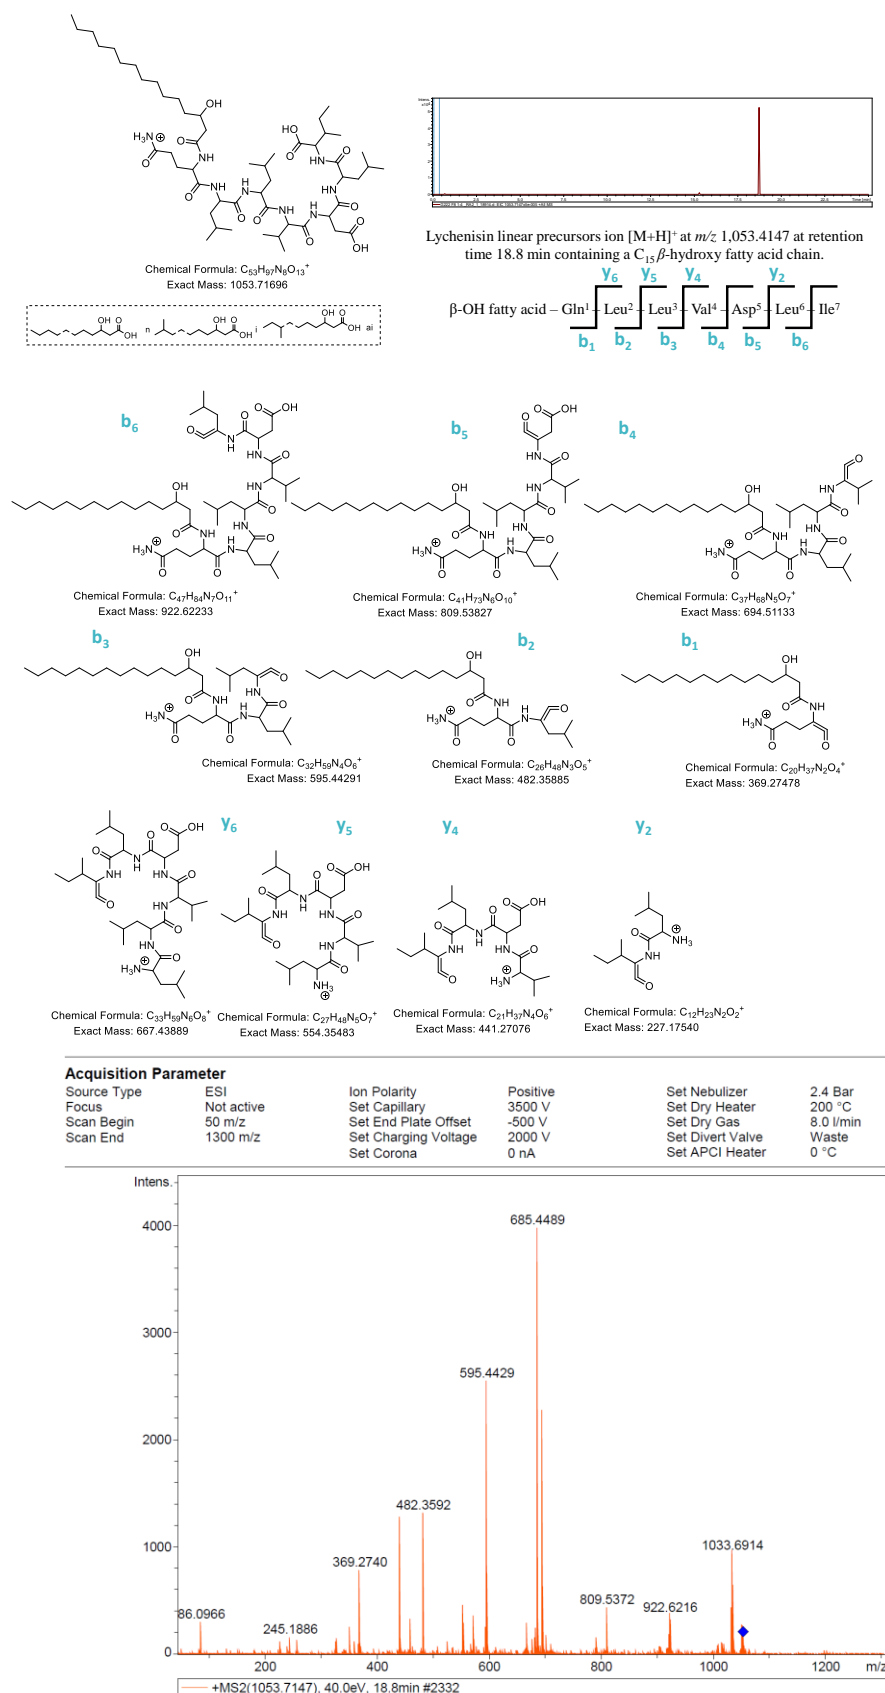

**Figure S12** Fragmentations pattern and positive ion mode high-resolution ESI MS/MS spectrum for linear Lichenysin (11) ( $m/z$  1053.7147  $[M + H]^+$ )



**Table S11.** Product ion spectra data for Linear Lichenysin (11) ( $m/z$  1053.7147  $[M + H]^+$ ).

| Product ion Assignment                                                                                                                                         | ( $m/z$ ) | Error, pm | Molecular Formula                                              |
|----------------------------------------------------------------------------------------------------------------------------------------------------------------|-----------|-----------|----------------------------------------------------------------|
| $\beta$ -OH fatty acid – Gln <sup>1</sup> – Leu <sup>2</sup> – Leu <sup>3</sup> – Val <sup>4</sup> –<br>Asp <sup>5</sup> – Leu <sup>6</sup> – Ile <sup>7</sup> | 1053.7147 | -2.1      | C <sub>53</sub> H <sub>97</sub> N <sub>8</sub> O <sub>13</sub> |
| b <sub>6</sub>                                                                                                                                                 | 922.6216  | 0.8       | C <sub>47</sub> H <sub>84</sub> N <sub>7</sub> O <sub>11</sub> |
| b <sub>5</sub>                                                                                                                                                 | 809.5372  | 1.3       | C <sub>41</sub> H <sub>73</sub> N <sub>6</sub> O <sub>10</sub> |
| b <sub>4</sub>                                                                                                                                                 | 694.5120  | -0.9      | C <sub>37</sub> H <sub>68</sub> N <sub>5</sub> O <sub>7</sub>  |
| b <sub>3</sub>                                                                                                                                                 | 595.4429  | 0.0       | C <sub>32</sub> H <sub>59</sub> N <sub>4</sub> O <sub>6</sub>  |
| b <sub>2</sub>                                                                                                                                                 | 482.3592  | -0.7      | C <sub>26</sub> H <sub>48</sub> N <sub>3</sub> O <sub>5</sub>  |
| b <sub>1</sub>                                                                                                                                                 | 369.2740  | 2.0       | C <sub>20</sub> H <sub>37</sub> N <sub>2</sub> O <sub>4</sub>  |
| y <sub>6</sub>                                                                                                                                                 | 667.4389  | 0.9       | C <sub>33</sub> H <sub>59</sub> N <sub>8</sub> O <sub>6</sub>  |
| y <sub>5</sub>                                                                                                                                                 | 554.3551  | -0.5      | C <sub>27</sub> H <sub>48</sub> N <sub>5</sub> O <sub>7</sub>  |
| y <sub>4</sub>                                                                                                                                                 | 441.2698  | 2.5       | C <sub>21</sub> H <sub>37</sub> N <sub>4</sub> O <sub>6</sub>  |
| y <sub>2</sub>                                                                                                                                                 | 227.1755  | 0.5       | C <sub>12</sub> H <sub>23</sub> N <sub>2</sub> O <sub>2</sub>  |

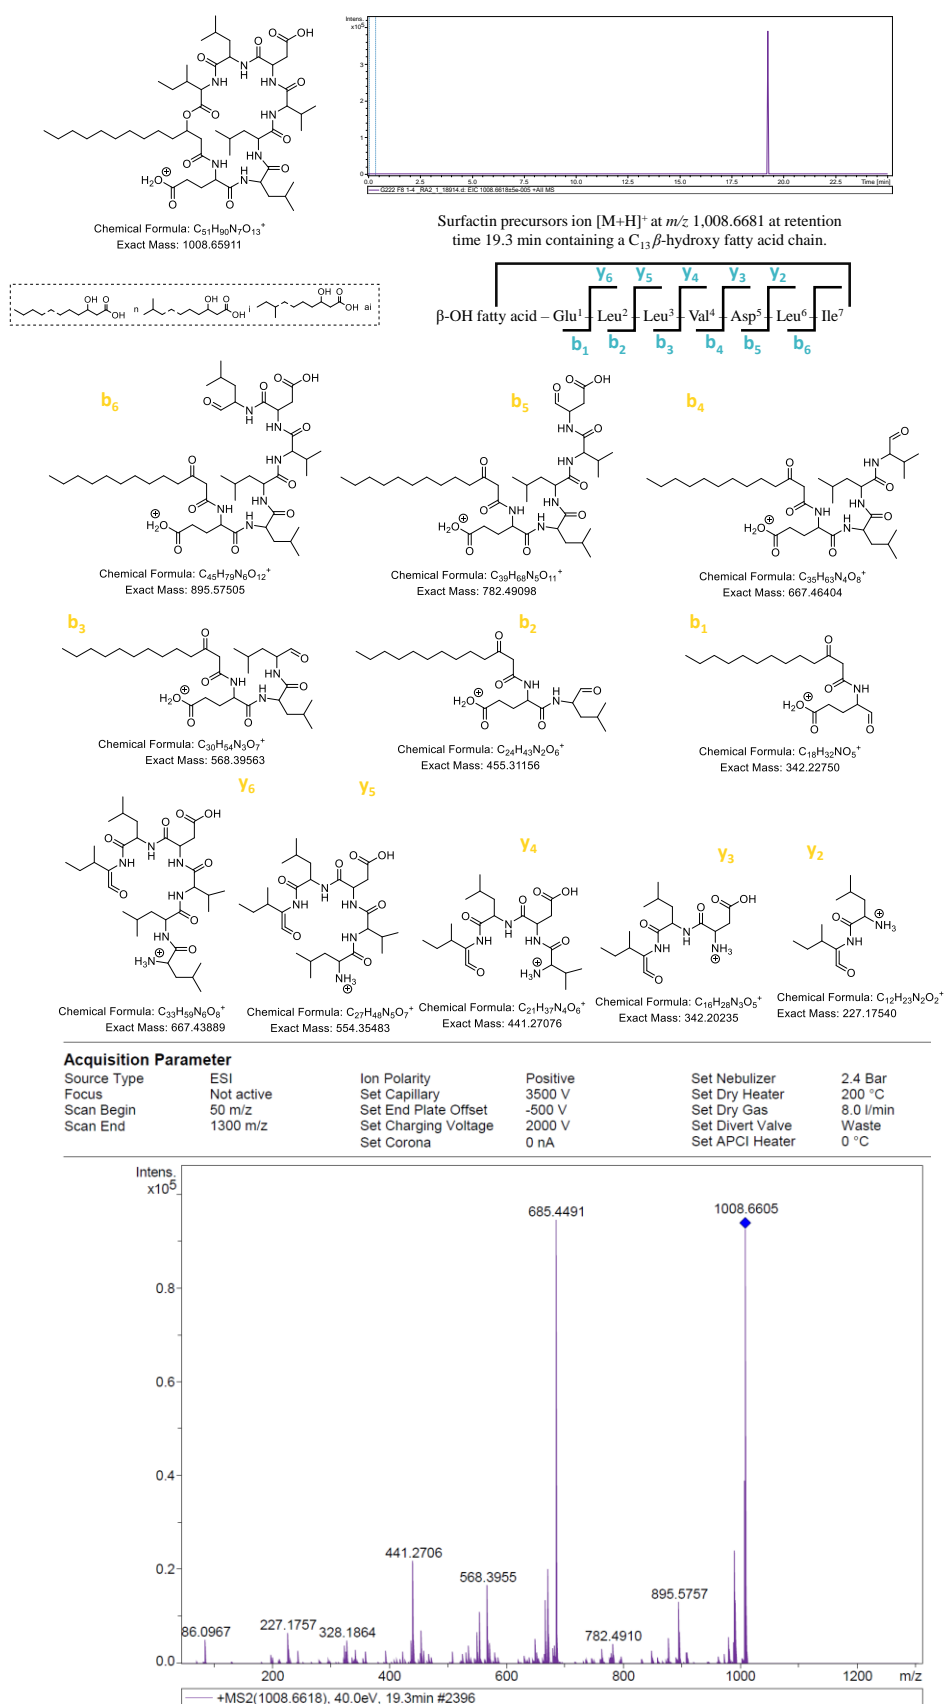

**Figure S13:** Fragmentations pattern and positive ion mode high-resolution ESI MS/MS spectrum for Surfactin (12) ( $m/z$  1008.6618  $[M + H]^+$ )

**Table S12.** Product ion spectra data for Surfactin (**12**) ( $m/z$  1008.6618  $[M + H]^+$ ).

| Product ion Assignment                                                                                                                                                 | ( $m/z$ ) | Error, pm | Molecular Formula                                              |
|------------------------------------------------------------------------------------------------------------------------------------------------------------------------|-----------|-----------|----------------------------------------------------------------|
| $\beta$ -OH fatty acid – Glu <sup>1</sup> – Leu/Ile <sup>2</sup> – Leu <sup>3</sup> – Val <sup>4</sup><br>– Asp <sup>5</sup> – Leu <sup>6</sup> – Leu/Ile <sup>7</sup> | 1008.6618 | 2.7       | C <sub>51</sub> H <sub>90</sub> N <sub>7</sub> O <sub>13</sub> |
| b <sub>6</sub>                                                                                                                                                         | 895.5757  | 0.8       | C <sub>45</sub> H <sub>79</sub> N <sub>6</sub> O <sub>12</sub> |
| b <sub>5</sub>                                                                                                                                                         | 782.4910  | 0.0       | C <sub>39</sub> H <sub>68</sub> N <sub>5</sub> O <sub>11</sub> |
| b <sub>4</sub>                                                                                                                                                         | 667.4605  | 0.6       | C <sub>35</sub> H <sub>63</sub> N <sub>4</sub> O <sub>8</sub>  |
| b <sub>3</sub>                                                                                                                                                         | 568.3955  | 0.2       | C <sub>30</sub> H <sub>54</sub> N <sub>3</sub> O <sub>7</sub>  |
| b <sub>2</sub>                                                                                                                                                         | 455.3114  | 0.4       | C <sub>24</sub> H <sub>43</sub> N <sub>2</sub> O <sub>6</sub>  |
| b <sub>1</sub>                                                                                                                                                         | 342.2277  | -0.6      | C <sub>18</sub> H <sub>33</sub> N <sub>1</sub> O <sub>5</sub>  |
| y <sub>6</sub>                                                                                                                                                         | 667.4412  | -3.4      | C <sub>33</sub> H <sub>59</sub> N <sub>8</sub> O <sub>6</sub>  |
| y <sub>5</sub>                                                                                                                                                         | 554.3546  | 0.3       | C <sub>27</sub> H <sub>48</sub> N <sub>5</sub> O <sub>7</sub>  |
| y <sub>4</sub>                                                                                                                                                         | 441.2706  | 0.3       | C <sub>21</sub> H <sub>37</sub> N <sub>4</sub> O <sub>6</sub>  |
| y <sub>3</sub>                                                                                                                                                         | 342.2023  | 0.1       | C <sub>16</sub> H <sub>32</sub> N <sub>5</sub> O <sub>3</sub>  |
| y <sub>2</sub>                                                                                                                                                         | 227.0655  | -1.4      | C <sub>12</sub> H <sub>23</sub> N <sub>2</sub> O <sub>2</sub>  |

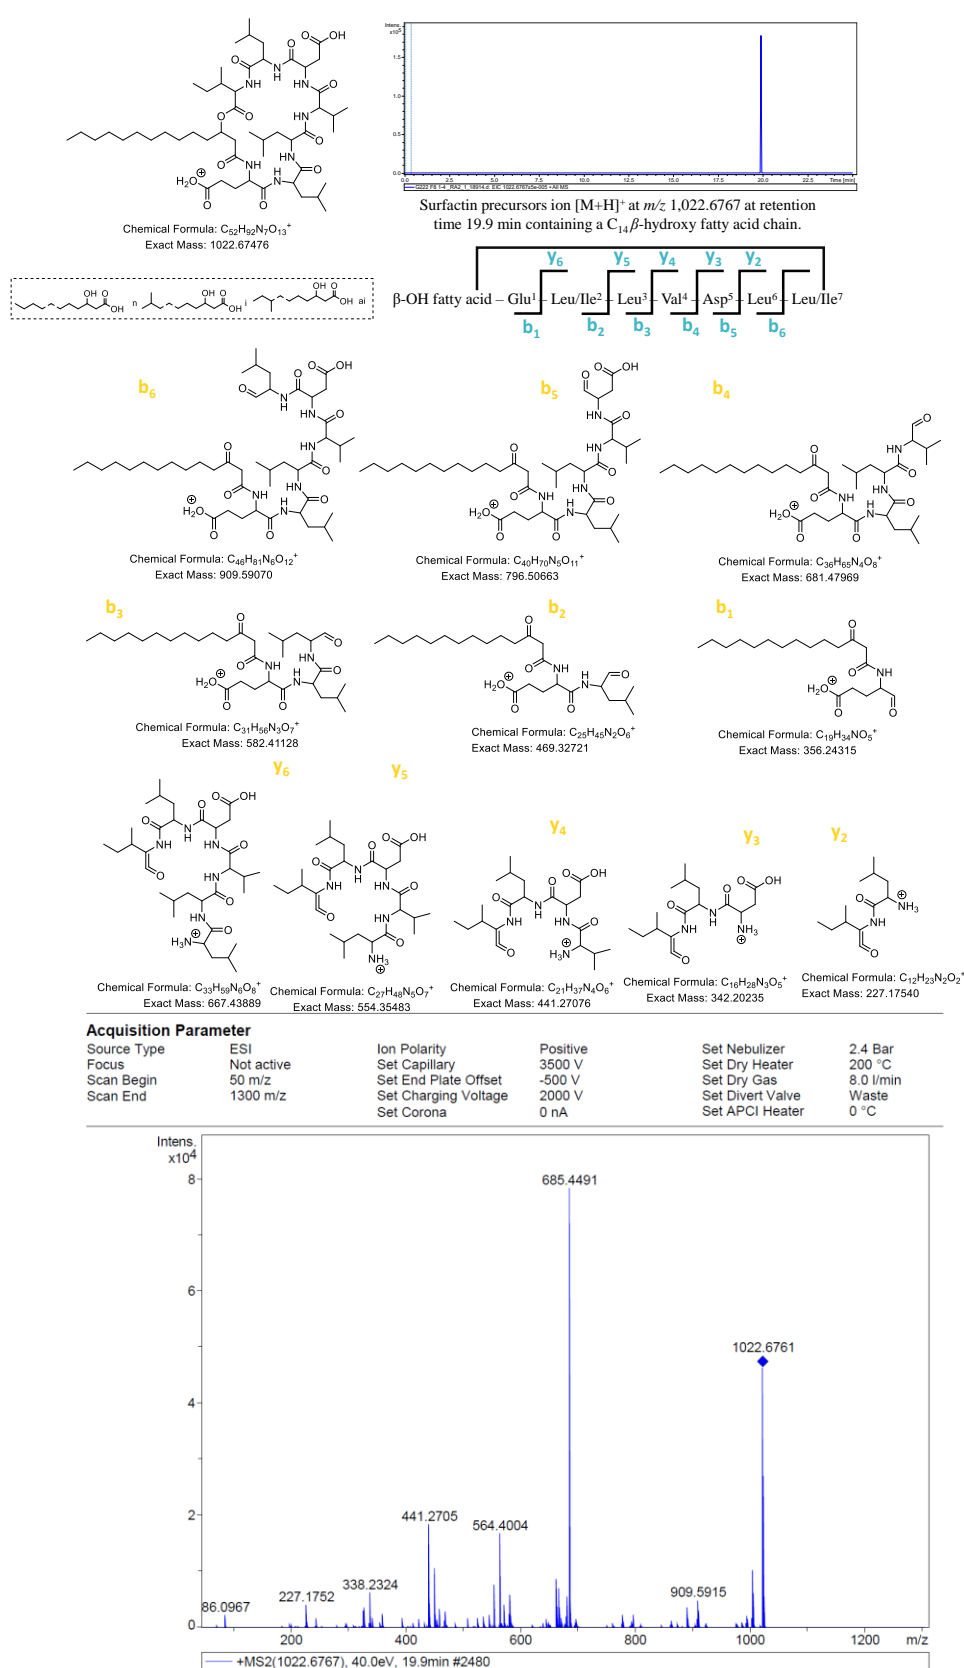

**Figure S14:** Fragmentations pattern and positive ion mode high-resolution ESI MS/MS spectrum for Surfactin (13) ( $m/z$  1022.6767  $[M + H]^+$ )

**Table S13.** Product ion spectra data for Surfactin (13) ( $m/z$  1022.6767 [M + H]<sup>+</sup>).

| Product ion Assignment                                                                                                                                                 | ( $m/z$ ) | Error, pm | Molecular Formula                                              |
|------------------------------------------------------------------------------------------------------------------------------------------------------------------------|-----------|-----------|----------------------------------------------------------------|
| $\beta$ -OH fatty acid – Glu <sup>1</sup> – Leu/Ile <sup>2</sup> – Leu <sup>3</sup> – Val <sup>4</sup><br>– Asp <sup>5</sup> – Leu <sup>6</sup> – Leu/Ile <sup>7</sup> | 1022.6767 | 1.9       | C <sub>52</sub> H <sub>92</sub> N <sub>7</sub> O <sub>13</sub> |
| b <sub>6</sub>                                                                                                                                                         | 909.5915  | -0.9      | C <sub>46</sub> H <sub>81</sub> N <sub>6</sub> O <sub>12</sub> |
| b <sub>5</sub>                                                                                                                                                         | 796.5079  | -1.6      | C <sub>40</sub> H <sub>70</sub> N <sub>5</sub> O <sub>11</sub> |
| b <sub>4</sub>                                                                                                                                                         | 681.4800  | 1.5       | C <sub>36</sub> H <sub>65</sub> N <sub>4</sub> O <sub>8</sub>  |
| b <sub>3</sub>                                                                                                                                                         | 582.4119  | -1.1      | C <sub>31</sub> H <sub>56</sub> N <sub>3</sub> O <sub>7</sub>  |
| b <sub>2</sub>                                                                                                                                                         | 469.3273  | -0.1      | C <sub>25</sub> H <sub>45</sub> N <sub>2</sub> O <sub>6</sub>  |
| b <sub>1</sub>                                                                                                                                                         | 356.2429  | 0.6       | C <sub>19</sub> H <sub>34</sub> NO <sub>5</sub>                |
| y <sub>6</sub>                                                                                                                                                         | 667.4383  | 0.9       | C <sub>33</sub> H <sub>59</sub> N <sub>8</sub> O <sub>6</sub>  |
| y <sub>5</sub>                                                                                                                                                         | 554.3546  | 0.4       | C <sub>27</sub> H <sub>48</sub> N <sub>5</sub> O <sub>7</sub>  |
| y <sub>4</sub>                                                                                                                                                         | 441.2705  | 0.6       | C <sub>21</sub> H <sub>37</sub> N <sub>4</sub> O <sub>6</sub>  |
| y <sub>3</sub>                                                                                                                                                         | 342.2024  | -0.1      | C <sub>16</sub> H <sub>32</sub> N <sub>5</sub> O <sub>3</sub>  |
| y <sub>2</sub>                                                                                                                                                         | 227.1752  | 0.8       | C <sub>12</sub> H <sub>23</sub> N <sub>2</sub> O <sub>2</sub>  |

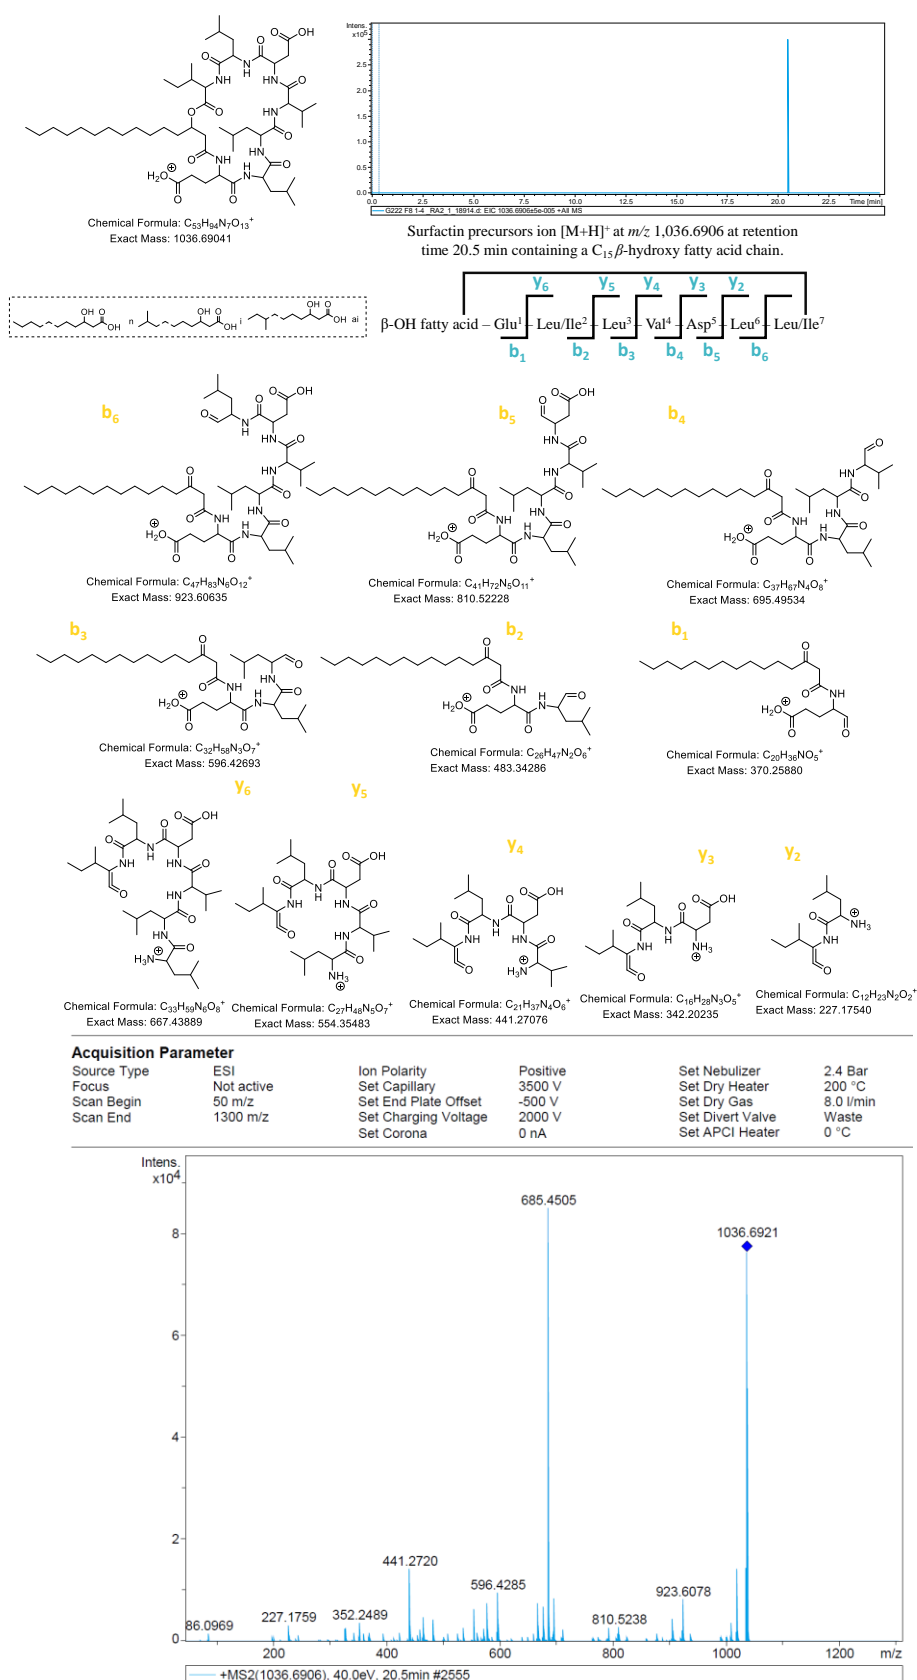

**Figure S15:** Fragmentations pattern and positive ion mode high-resolution ESI MS/MS spectrum for Surfactin (14) ( $m/z$  1036.6906  $[M + H]^+$ )

**Table S14:** Product ion spectra data for Surfactin (**14**) ( $m/z$  1036.6906  $[M + H]^+$ )

| Product ion Assignment                                                                                                                                                 | ( $m/z$ ) | Error, pm | Molecular Formula                                              |
|------------------------------------------------------------------------------------------------------------------------------------------------------------------------|-----------|-----------|----------------------------------------------------------------|
| $\beta$ -OH fatty acid – Glu <sup>1</sup> – Leu/Ile <sup>2</sup> – Leu <sup>3</sup> – Val <sup>4</sup><br>– Asp <sup>5</sup> – Leu <sup>6</sup> – Leu/Ile <sup>7</sup> | 1036.6906 | 0.2       | C <sub>53</sub> H <sub>94</sub> N <sub>7</sub> O <sub>13</sub> |
| b <sub>6</sub>                                                                                                                                                         | 923.6078  | -1.6      | C <sub>47</sub> H <sub>83</sub> N <sub>6</sub> O <sub>12</sub> |
| b <sub>5</sub>                                                                                                                                                         | 810.5238  | -1.8      | C <sub>41</sub> H <sub>72</sub> N <sub>5</sub> O <sub>11</sub> |
| b <sub>4</sub>                                                                                                                                                         | 695.4970  | -2.4      | C <sub>37</sub> H <sub>67</sub> N <sub>4</sub> O <sub>8</sub>  |
| b <sub>3</sub>                                                                                                                                                         | 596.4285  | -2.6      | C <sub>32</sub> H <sub>58</sub> N <sub>3</sub> O <sub>7</sub>  |
| b <sub>2</sub>                                                                                                                                                         | 483.3440  | 0.5       | C <sub>26</sub> H <sub>47</sub> N <sub>2</sub> O <sub>6</sub>  |
| b <sub>1</sub>                                                                                                                                                         | 370.2599  | 4.2       | C <sub>20</sub> H <sub>36</sub> N <sub>1</sub> O <sub>5</sub>  |
| y <sub>6</sub>                                                                                                                                                         | 667.4401  | -1.8      | C <sub>33</sub> H <sub>59</sub> N <sub>8</sub> O <sub>6</sub>  |
| y <sub>5</sub>                                                                                                                                                         | 554.3548  | -2.1      | C <sub>27</sub> H <sub>48</sub> N <sub>5</sub> O <sub>7</sub>  |
| y <sub>4</sub>                                                                                                                                                         | 441.2720  | -2.9      | C <sub>21</sub> H <sub>37</sub> N <sub>4</sub> O <sub>6</sub>  |
| y <sub>3</sub>                                                                                                                                                         | 342.2033  | -2.8      | C <sub>16</sub> H <sub>32</sub> N <sub>5</sub> O <sub>3</sub>  |
| y <sub>2</sub>                                                                                                                                                         | 227.1759  | -2.1      | C <sub>12</sub> H <sub>23</sub> N <sub>2</sub> O <sub>2</sub>  |

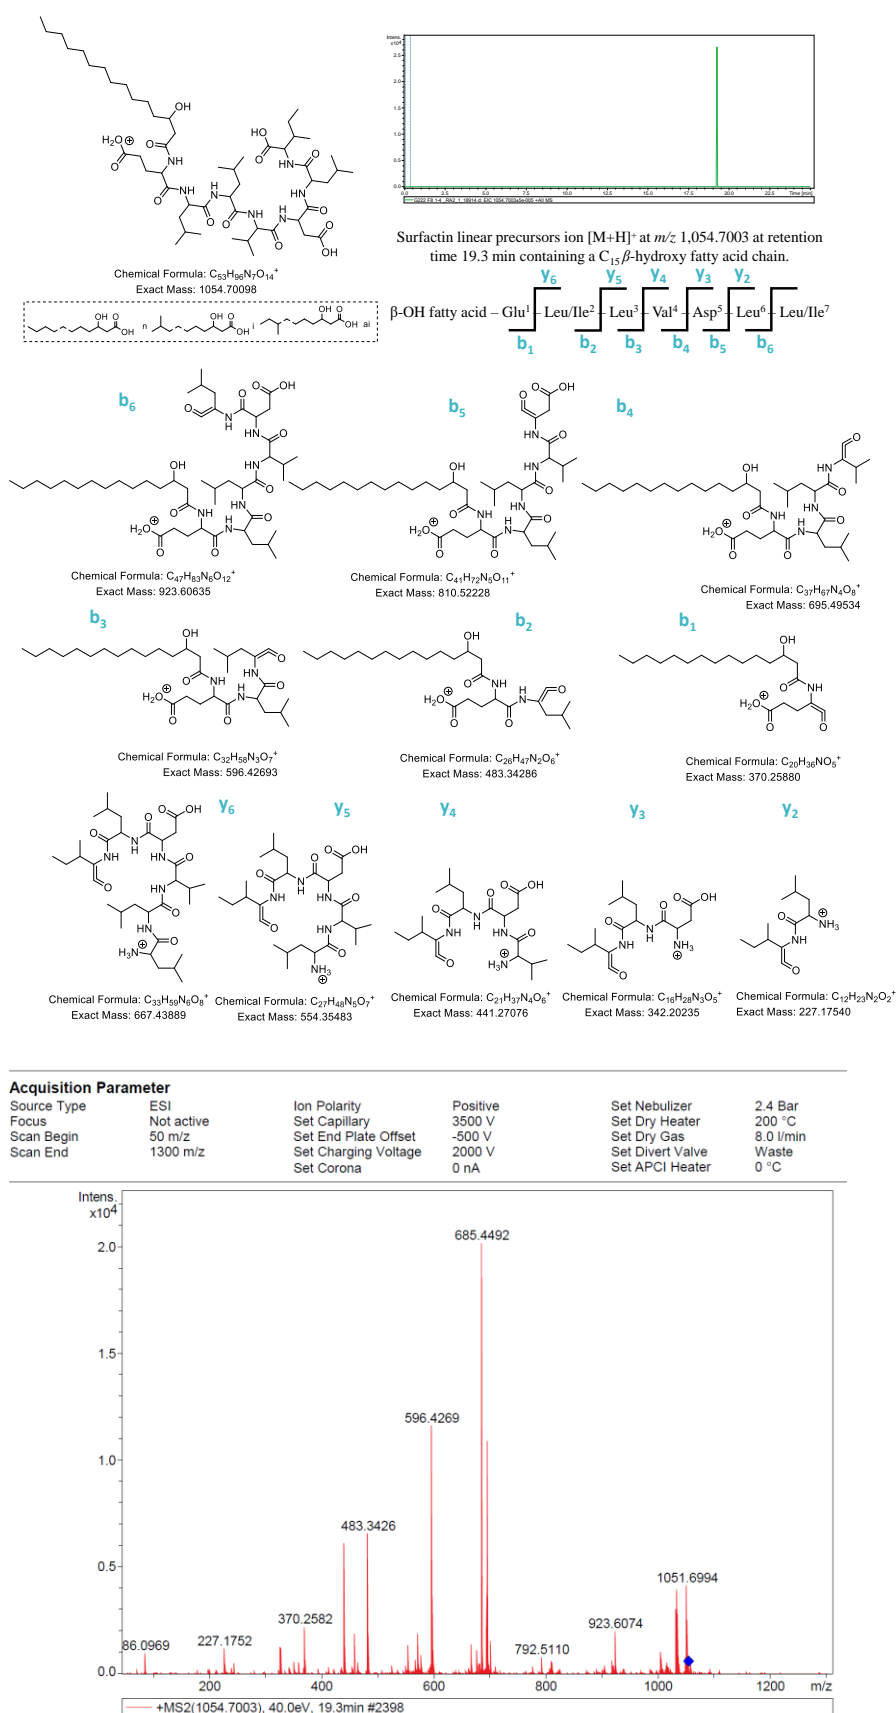

**Figure S16:** Fragmentations pattern and positive ion mode high-resolution ESI MS/MS spectrum for linear Surfactin (15) ( $m/z$  1054.7003  $[M + H]^+$ )



**Table S15:** Product ion spectra data for Linear Surfactin (**15**) ( $m/z$  1054.7003  $[M + H]^+$ )

| Product ion Assignment                                                                                                                                                 | ( $m/z$ ) | Error, pm | Molecular Formula                                              |
|------------------------------------------------------------------------------------------------------------------------------------------------------------------------|-----------|-----------|----------------------------------------------------------------|
| $\beta$ -OH fatty acid – Glu <sup>1</sup> – Leu/Ile <sup>2</sup> – Leu <sup>3</sup> – Val <sup>4</sup><br>– Asp <sup>5</sup> – Leu <sup>6</sup> – Leu/Ile <sup>7</sup> | 1054.7003 | 0.6       | C <sub>53</sub> H <sub>96</sub> N <sub>7</sub> O <sub>14</sub> |
| b <sub>6</sub>                                                                                                                                                         | 923.6074  | -1.2      | C <sub>47</sub> H <sub>83</sub> N <sub>6</sub> O <sub>12</sub> |
| b <sub>5</sub>                                                                                                                                                         | 810.5224  | -0.1      | C <sub>41</sub> H <sub>72</sub> N <sub>5</sub> O <sub>11</sub> |
| b <sub>4</sub>                                                                                                                                                         | 695.4949  | 2.5       | C <sub>37</sub> H <sub>67</sub> N <sub>4</sub> O <sub>8</sub>  |
| b <sub>3</sub>                                                                                                                                                         | 596.4269  | 0.0       | C <sub>32</sub> H <sub>58</sub> N <sub>3</sub> O <sub>7</sub>  |
| b <sub>2</sub>                                                                                                                                                         | 483.3426  | 0.6       | C <sub>26</sub> H <sub>47</sub> N <sub>2</sub> O <sub>6</sub>  |
| b <sub>1</sub>                                                                                                                                                         | 370.2582  | 1.7       | C <sub>20</sub> H <sub>36</sub> N <sub>1</sub> O <sub>5</sub>  |
| y <sub>6</sub>                                                                                                                                                         | 667.4322  | 0.4       | C <sub>33</sub> H <sub>59</sub> N <sub>8</sub> O <sub>6</sub>  |
| y <sub>5</sub>                                                                                                                                                         | 554.3551  | -0.6      | C <sub>27</sub> H <sub>48</sub> N <sub>5</sub> O <sub>7</sub>  |
| y <sub>4</sub>                                                                                                                                                         | 441.2708  | 0.0       | C <sub>21</sub> H <sub>37</sub> N <sub>4</sub> O <sub>6</sub>  |
| y <sub>3</sub>                                                                                                                                                         | 342.2024  | -0.1      | C <sub>16</sub> H <sub>28</sub> N <sub>3</sub> O <sub>5</sub>  |
| y <sub>2</sub>                                                                                                                                                         | 227.1752  | 1.0       | C <sub>12</sub> H <sub>23</sub> N <sub>2</sub> O <sub>2</sub>  |

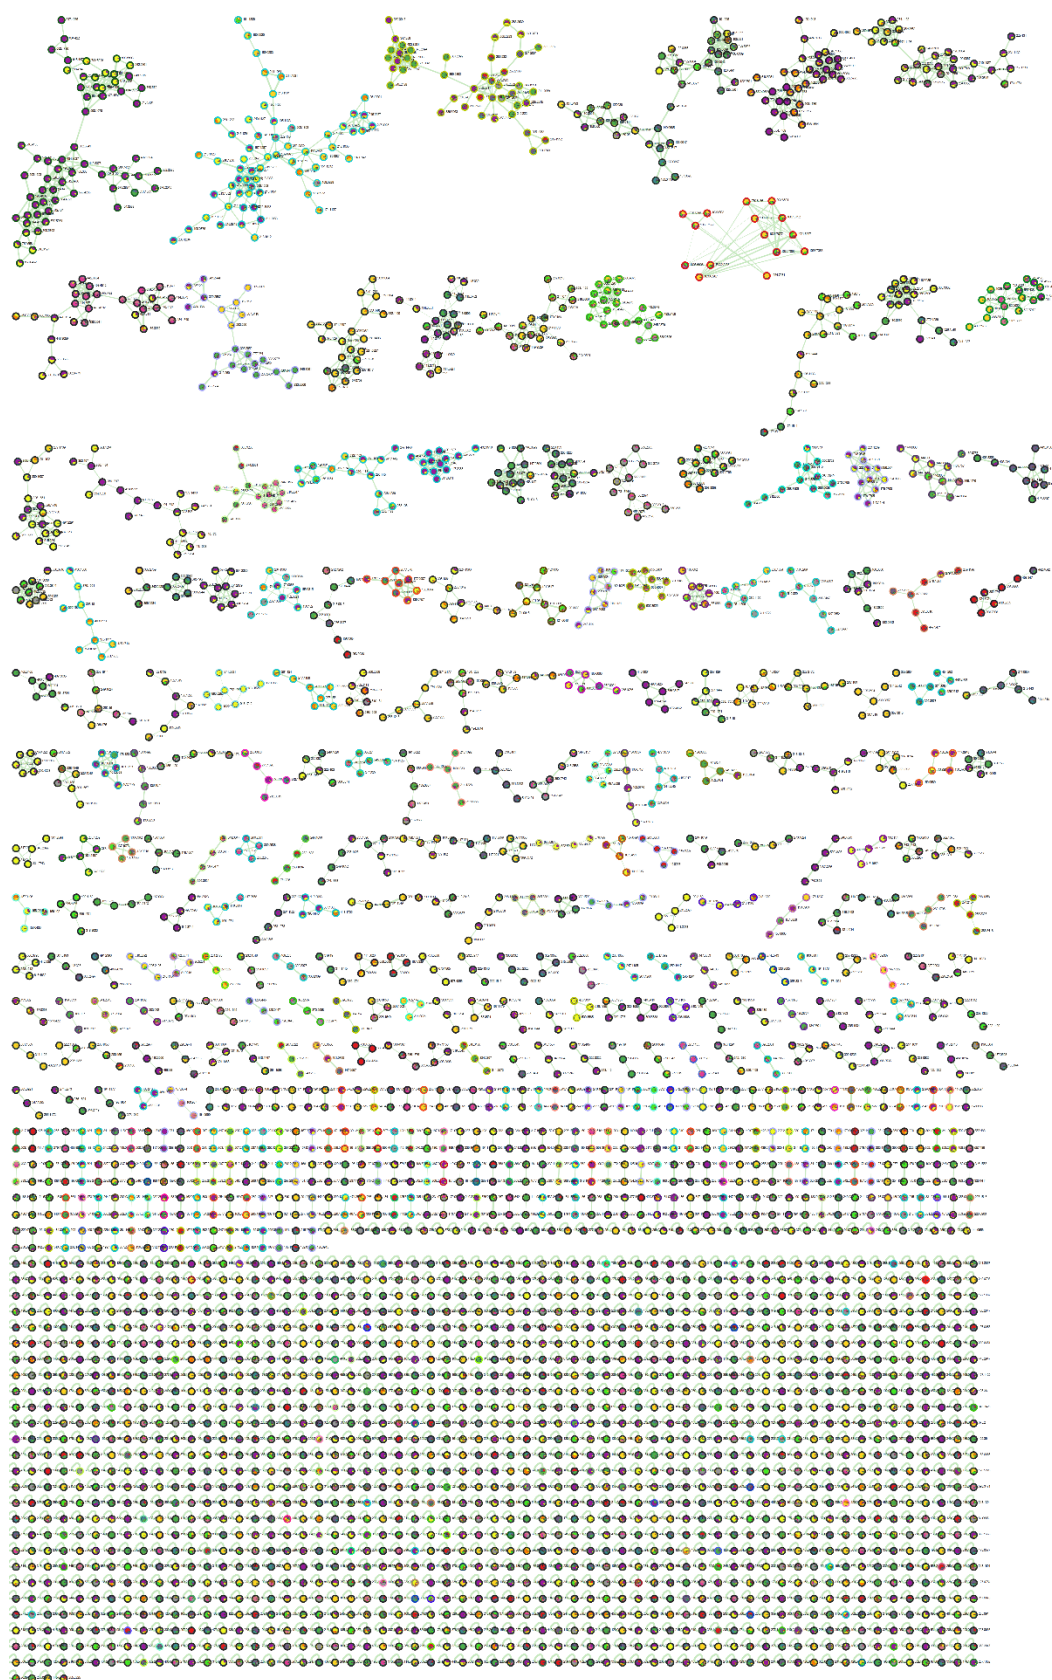

**Figure S17:** Molecular networks obtained using the Feature-Based Molecular Network workflow on GNPS (<https://gnps.ucsd.edu/ProteoSAFe/status.jsp?task=de168cddecfe40248fa3ba5077705e55>) (accessed on 23 May 2023).

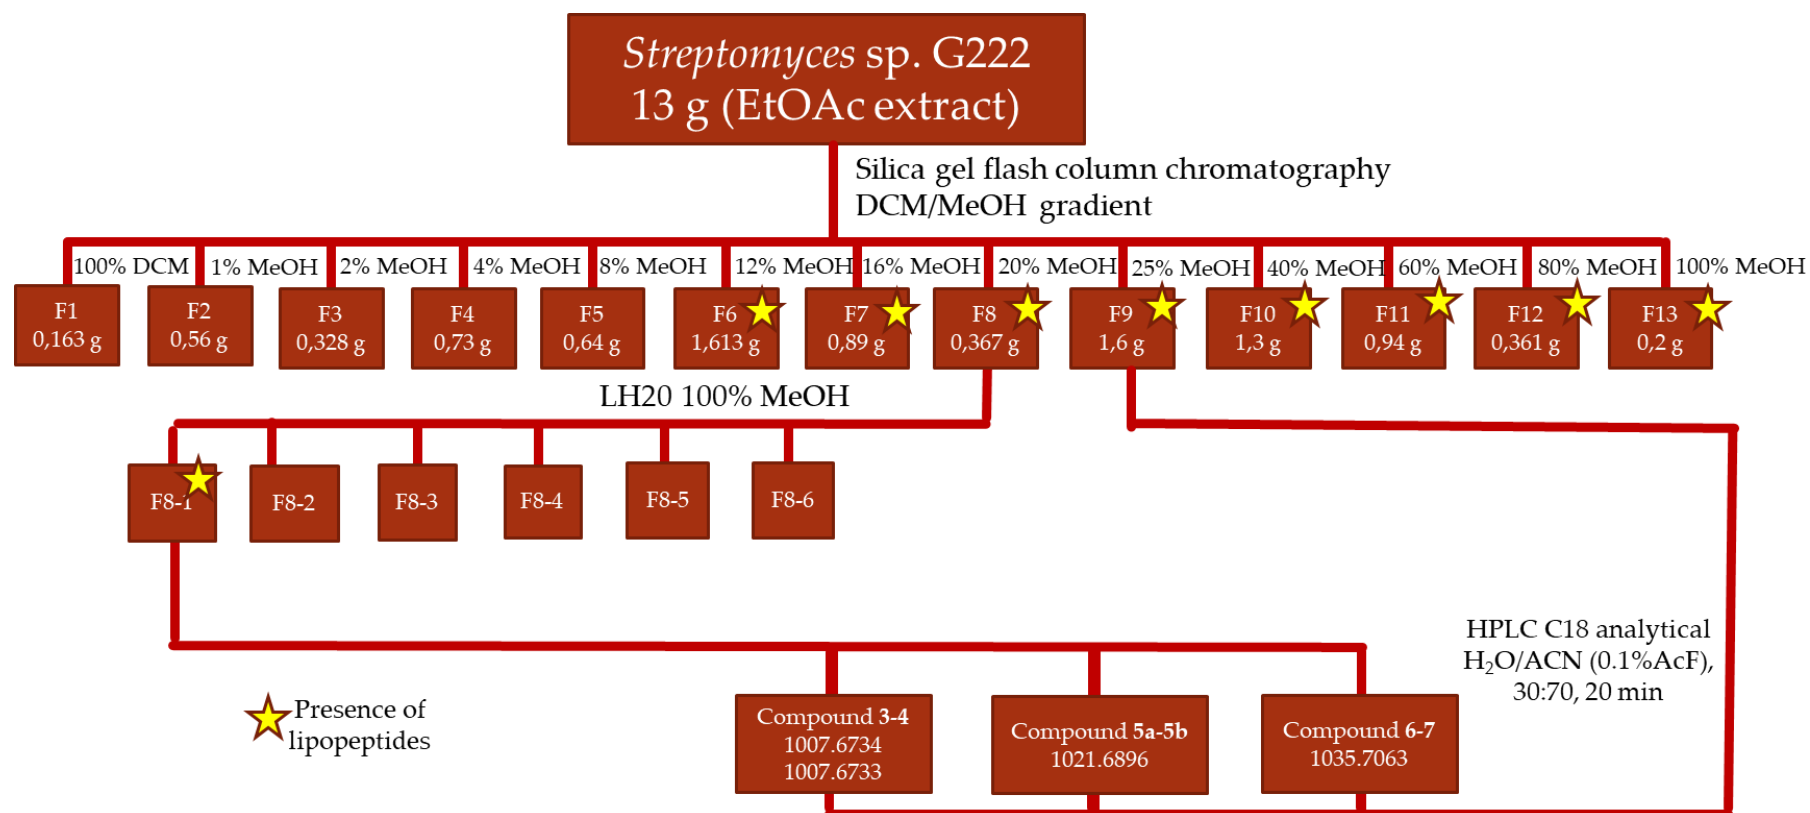

**Figure S18:** Chemical fractionation schema of *Streptomyces* sp. G222 crude extract.

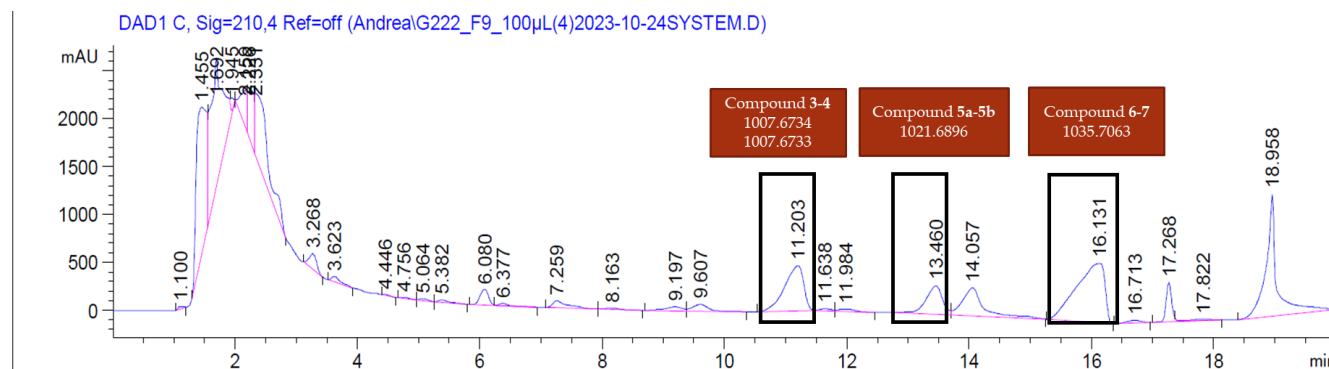

Figure S19: HPLC profile of the subfraction F9 at 210 nm.

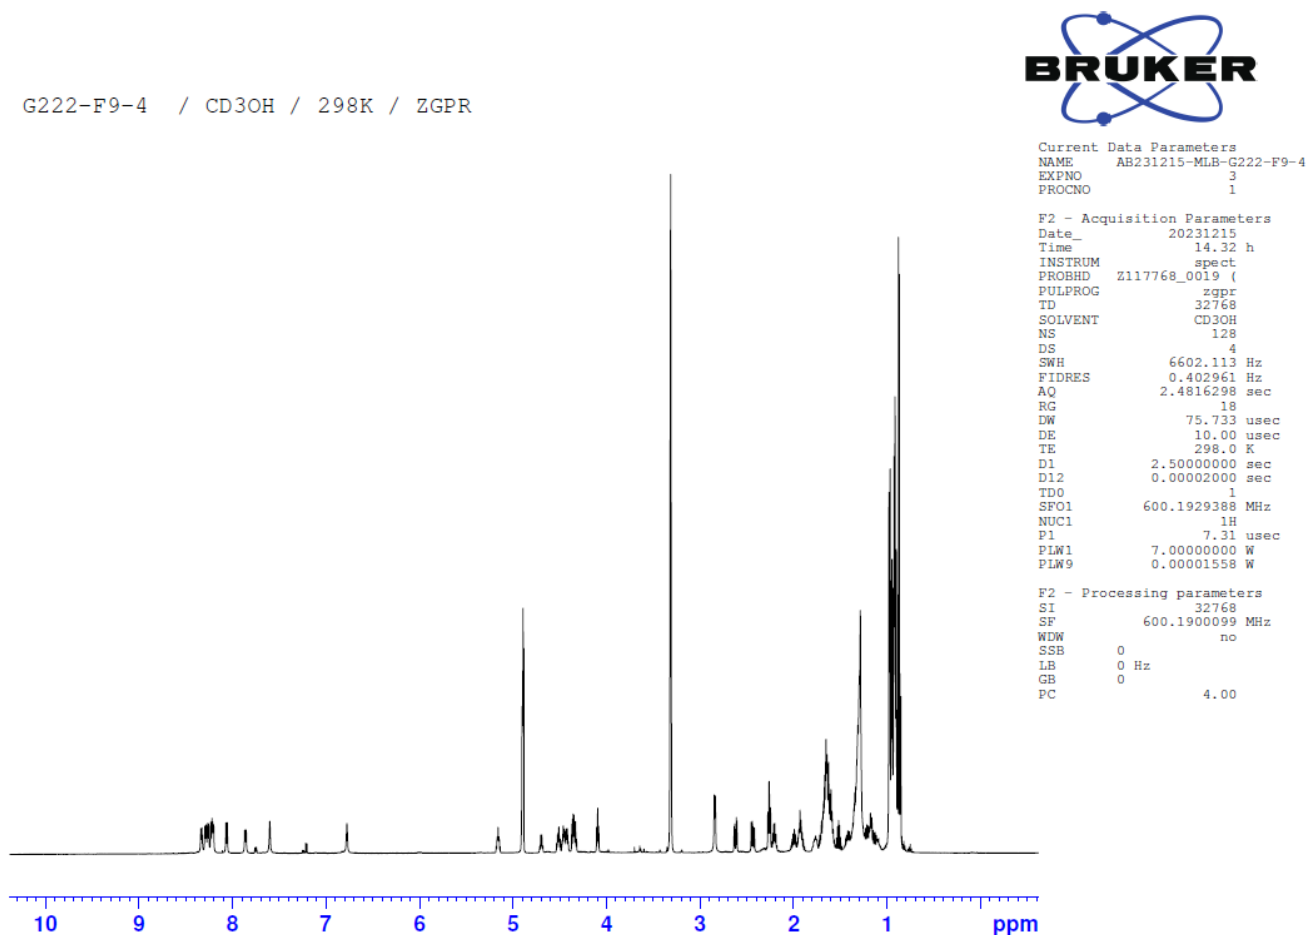

Figure S20:  $^1\text{H}$ -NMR spectrum of Lichenysin (3-4) ( $m/z$  1007.6734 and 1007.6733  $[\text{M} + \text{H}]^+$ ) (600 MHz,  $\text{CD}_3\text{OH}$ ).

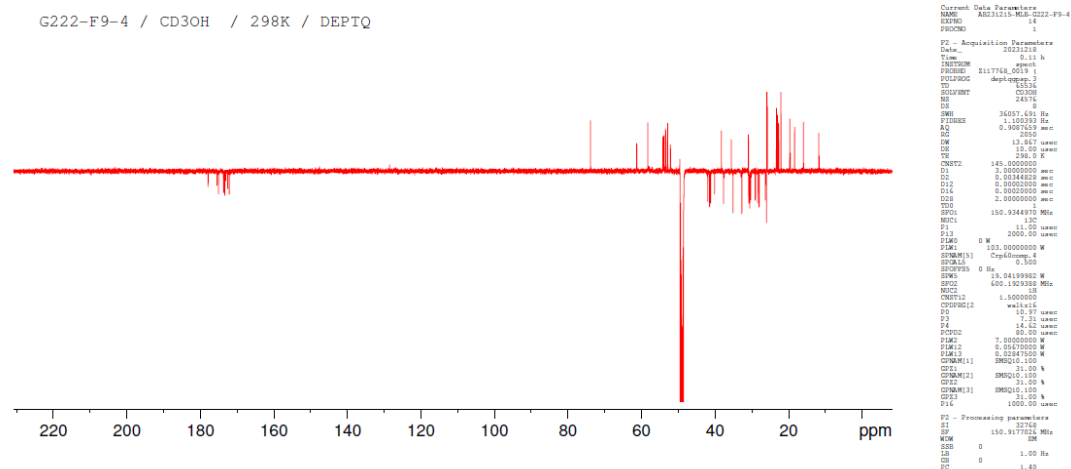

Figure S21: DEPTQ spectrum of Lichenysin (3-4) ( $m/z$  1007.6734 and 1007.6733  $[M + H]^+$ ) (600 MHz,  $CD_3OH$ ).

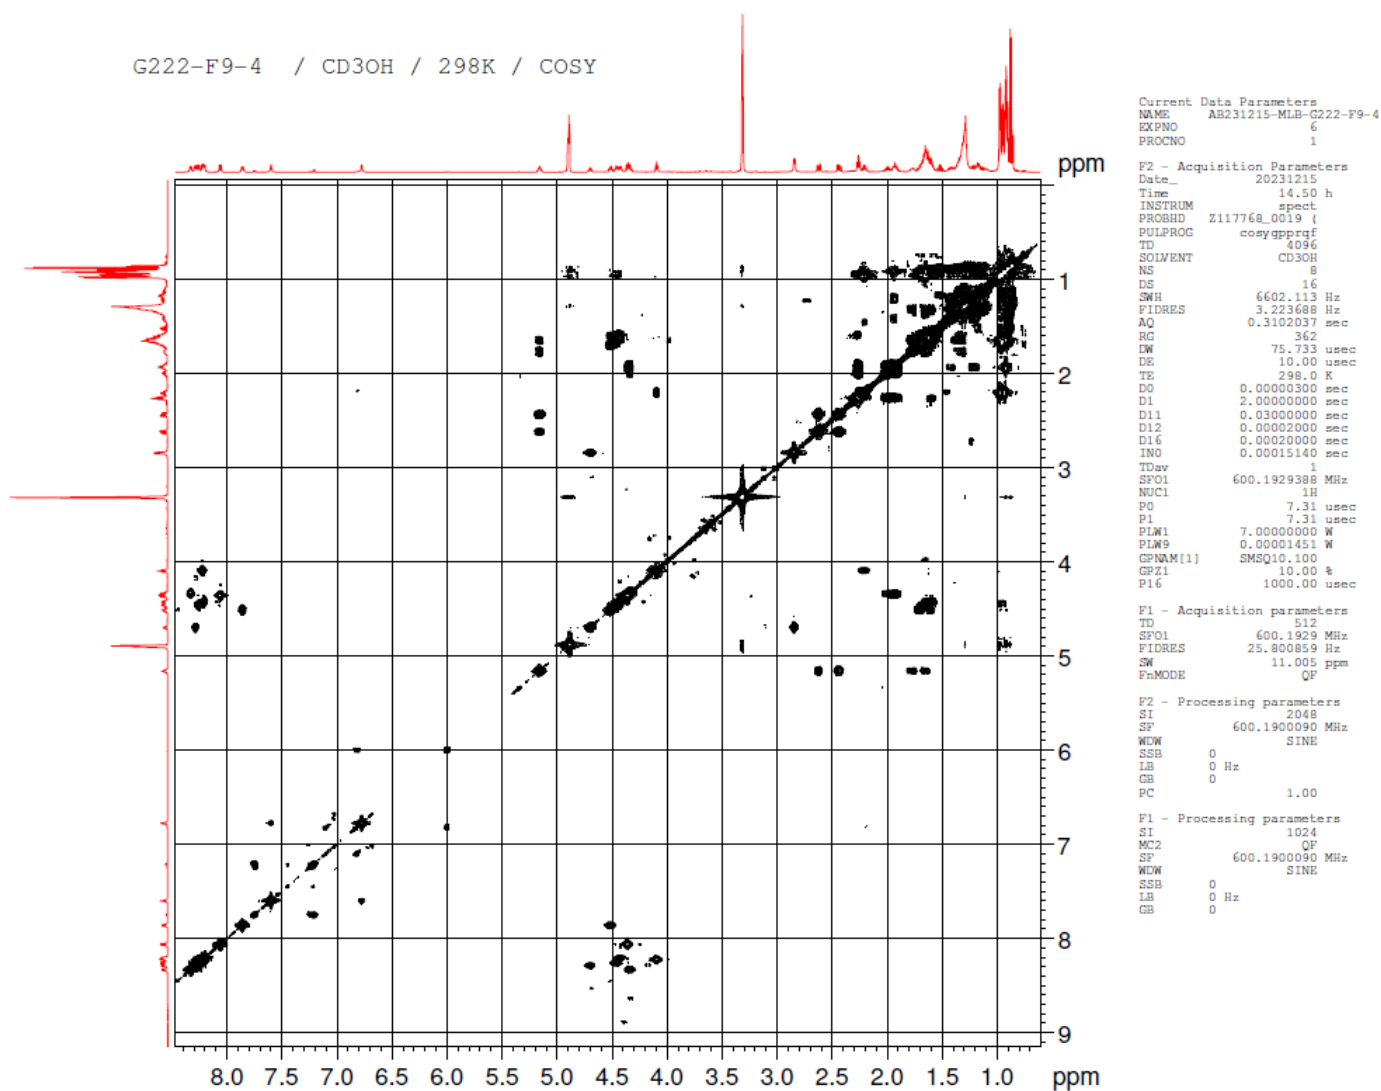

Figure S22: COSY-NMR spectrum of Lichenysin (3-4) ( $m/z$  1007.6734 and 1007.6733  $[M + H]^+$ ) (600 MHz,  $CD_3OH$ ).

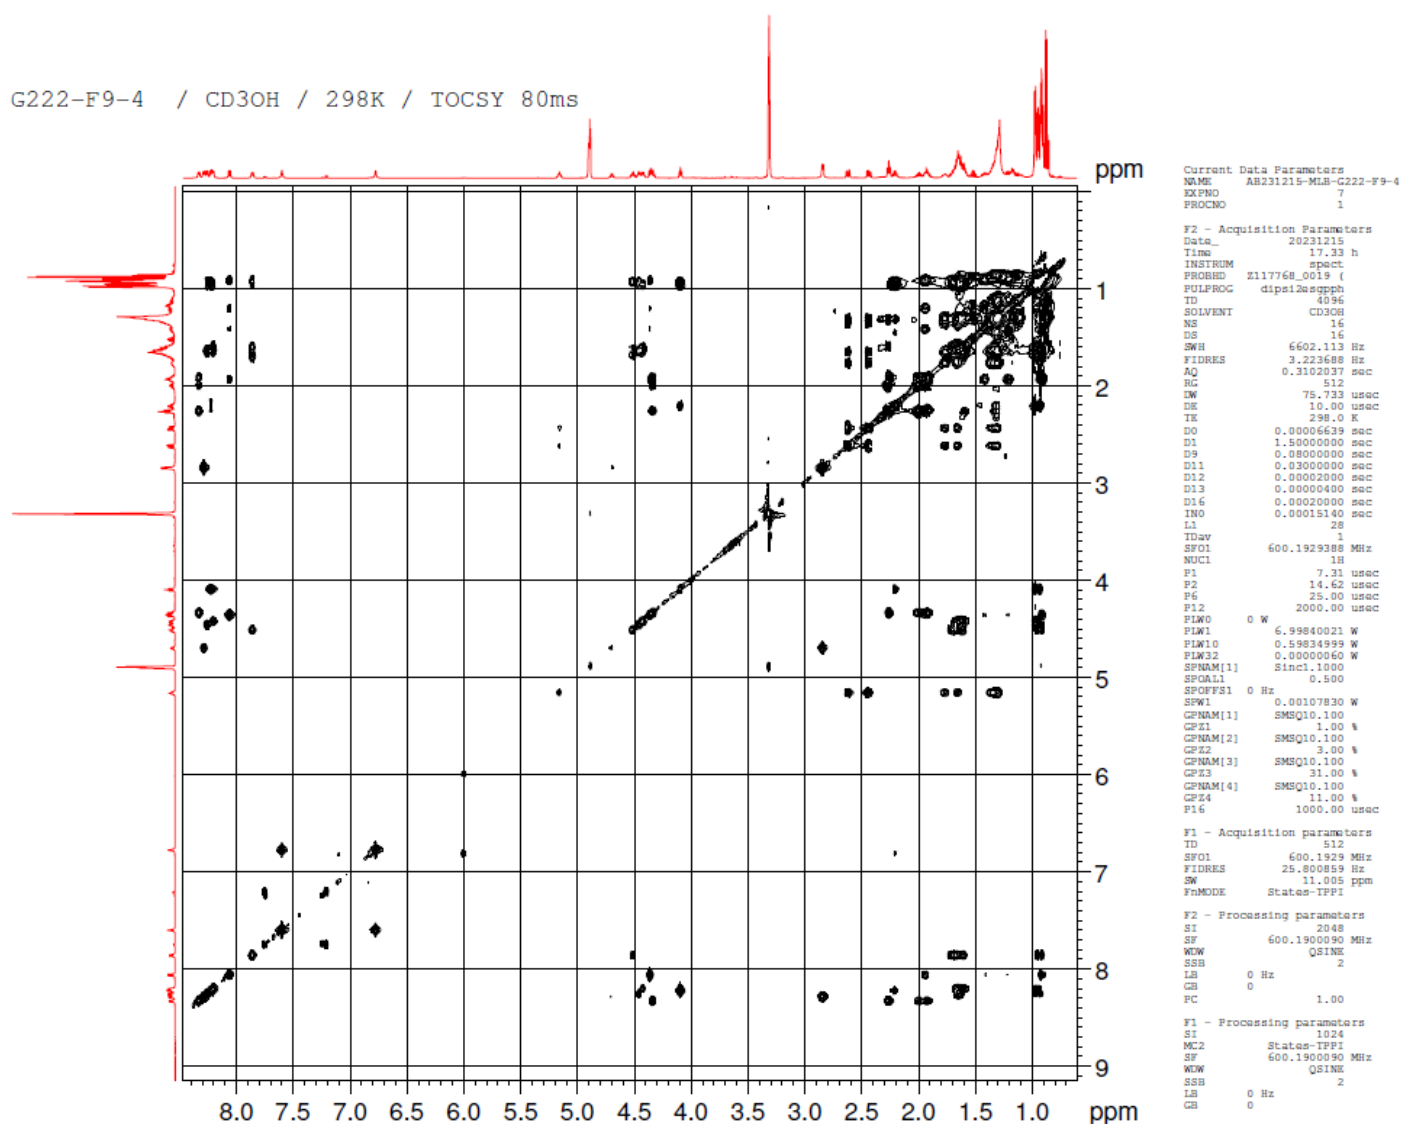

Figure S23: TOCSY-NMR spectrum of Lichenysin (3-4) ( $m/z$  1007.6734 and 1007.6733  $[M + H]^+$ ) (600 MHz,  $CD_3OH$ ).

G222-F9-4 / CD3OH / 298K / HSQCEDETGPSP.3

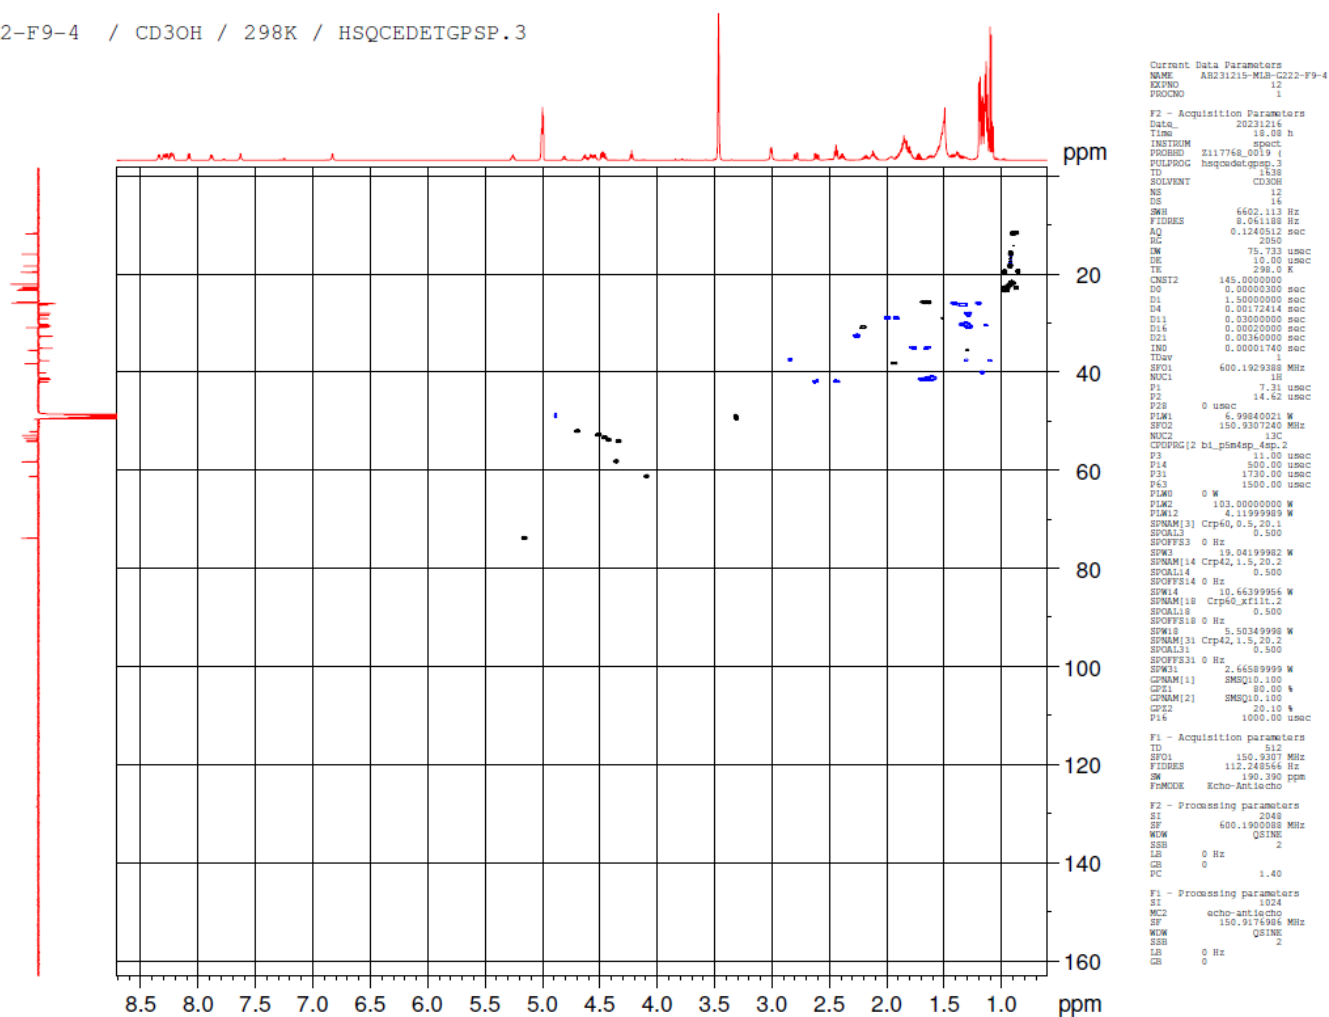

Figure S24: HSQC-NMR spectrum of Lichenysin (3-4) ( $m/z$  1007.6734 and 1007.6733  $[M + H]^+$ ) (600 MHz,  $CD_3OH$ )

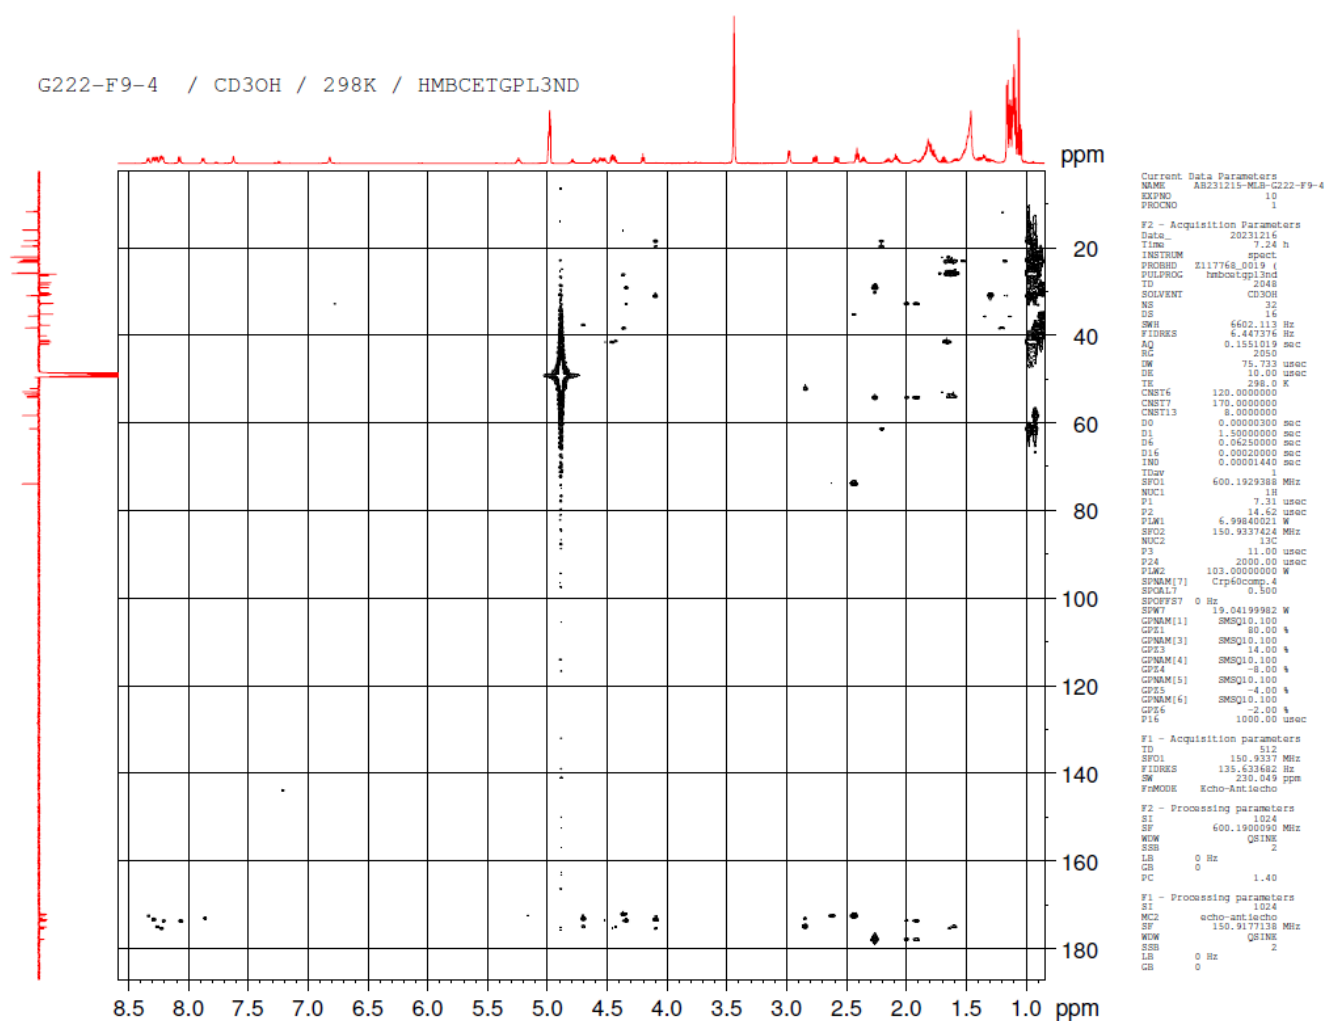

Figure S25: HMBC-NMR spectrum of Lichenysin (3-4) ( $m/z$  1007.6734 and 1007.6733  $[M + H]^+$ ) (600 MHz,  $CD_3OH$ ).



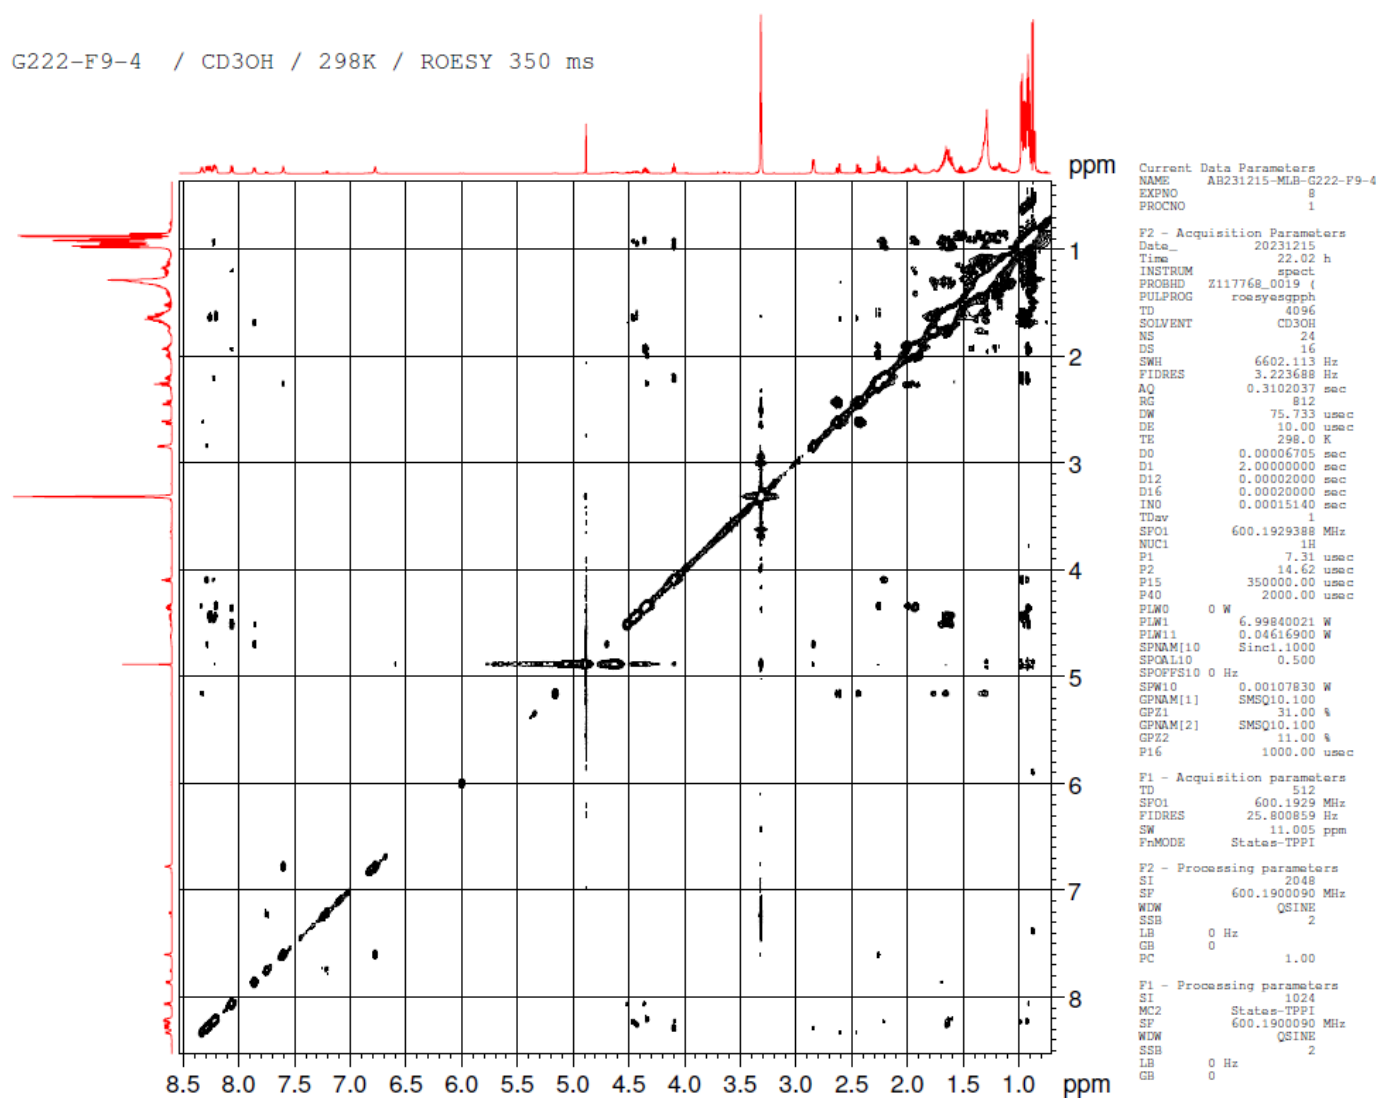

Figure S26: ROESY-NMR spectrum of Lichenysin (3-4) ( $m/z$  1007.6734 and 1007.6733  $[M + H]^+$ ) (600 MHz, CD<sub>3</sub>OH).

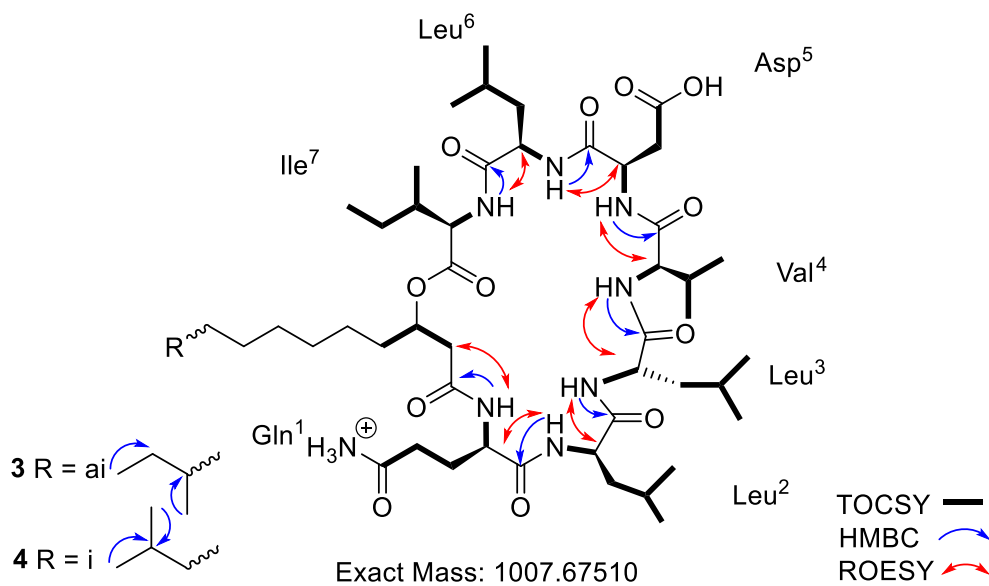

Figure S27: Structure of Lichenysins (3-4) ( $m/z$  1007.6734 and 1007.6733  $[M + H]^+$ ; respectively).

**Table S16.**  $^1\text{H}$ ,  $^{13}\text{C}$ , HMBC, and ROESY NMR data of Lichenysin (3-4) ( $m/z$  1007.6734 and 1007.6733  $[\text{M} + \text{H}]^+$ ) (600 MHz,  $\text{CD}_3\text{OH}$ ), isoform *ante-iso* and *iso* (0.8:0.2).

| Unit               | Pos.                        | $\delta_{\text{C}}$ , Mult. | $\delta_{\text{H}}$ ( $J$ in Hz) | HMBC                                                                                                                                     | ROESY <sup>a</sup>                                                                                                                              |
|--------------------|-----------------------------|-----------------------------|----------------------------------|------------------------------------------------------------------------------------------------------------------------------------------|-------------------------------------------------------------------------------------------------------------------------------------------------|
| L-Gln <sup>1</sup> | NH                          | -                           | 8.33, d (7.46)                   | Gln <sup>1</sup> - $\alpha$ , FA-CO,                                                                                                     | FA-2-a, FA-2-b, FA-3                                                                                                                            |
|                    | C=O                         | 173.62, C                   | -                                | -                                                                                                                                        | -                                                                                                                                               |
|                    | $\alpha$ -C                 | 54.15, CH                   | 4.33, ddd (7.46, 9.93, 14.13)    | Gln <sup>1</sup> -CO, Gln <sup>1</sup> - $\beta$ ,<br>Gln <sup>1</sup> - $\gamma$                                                        | Leu <sup>2</sup> -NH                                                                                                                            |
|                    | $\beta$ -C                  | 29.05, CH <sub>2</sub>      | 1.99, m<br>1.91, m               | Gln <sup>1</sup> -CO, Gln <sup>1</sup> - $\alpha$ ,<br>Gln <sup>1</sup> - $\gamma$ , Gln <sup>1</sup> - $\delta$ -C=O                    | Leu <sup>2</sup> -NH                                                                                                                            |
|                    | $\gamma$ -C                 | 32.75, CH <sub>2</sub>      | 2.26, t (7.46)                   | Gln <sup>1</sup> - $\alpha$ , Gln <sup>1</sup> - $\beta$ ,<br>Gln <sup>1</sup> - $\delta$ -C=O                                           | Leu <sup>2</sup> -NH                                                                                                                            |
|                    | $\delta$ -C=O               | 177.87, CO <sup>2</sup>     | -                                | -                                                                                                                                        | -                                                                                                                                               |
|                    | $\epsilon$ -NH <sub>2</sub> | -                           | 7.61, brs<br>6.77, brs           | Gln <sup>1</sup> - $\delta$ -C=O, Gln <sup>1</sup> - $\gamma$                                                                            | -                                                                                                                                               |
| L-Leu <sup>2</sup> | NH                          | -                           | 8.20, dd (7.57)                  | Gln <sup>1</sup> -CO                                                                                                                     | Gln <sup>1</sup> - $\alpha$ , Gln <sup>1</sup> - $\beta$ , Gln <sup>1</sup> - $\gamma$                                                          |
|                    | C=O                         | 175.09, C                   | -                                | -                                                                                                                                        | -                                                                                                                                               |
|                    | $\alpha$ -C                 | 53.90, CH                   | 4.42, ddd (5.93, 7.57, 14.06)    | Leu <sup>2</sup> -CO, Leu <sup>2</sup> - $\beta$ ,<br>Leu <sup>2</sup> - $\gamma$                                                        | Leu <sup>3</sup> -NH                                                                                                                            |
|                    | $\beta$ -C                  | 41.17, CH <sub>2</sub>      | 1.64, m<br>1.61, m               | Leu <sup>2</sup> -CO, Leu <sup>2</sup> - $\alpha$ ,<br>Leu <sup>2</sup> - $\gamma$                                                       | Leu <sup>3</sup> -NH                                                                                                                            |
|                    | $\gamma$ -C                 | 25.87, CH                   | 1.64, m                          | Leu <sup>2</sup> - $\alpha$ , Leu <sup>2</sup> - $\beta$ ,<br>Leu <sup>2</sup> - $\delta$ , Leu <sup>2</sup> - $\delta'$                 | Leu <sup>3</sup> -NH                                                                                                                            |
|                    | $\delta$ -C                 | 22.98, CH <sub>3</sub>      | 0.97, d (4.13)                   | Leu <sup>2</sup> - $\beta$ , Leu <sup>2</sup> - $\gamma$ , Leu <sup>2</sup> - $\delta'$                                                  | -                                                                                                                                               |
|                    | $\delta'$ -C                | 23.28, CH <sub>3</sub>      | 0.95, d (3.79)                   | Leu <sup>2</sup> - $\beta$ , Leu <sup>2</sup> - $\gamma$ , Leu <sup>2</sup> - $\delta$                                                   | -                                                                                                                                               |
| D-Leu <sup>3</sup> | NH                          | -                           | 8.26, d (7.18)                   | Leu <sup>2</sup> -CO, Leu <sup>3</sup> - $\alpha$                                                                                        | Leu <sup>2</sup> - $\alpha$ , Leu <sup>2</sup> - $\beta$ , Leu <sup>2</sup> - $\gamma$                                                          |
|                    | C=O                         | 175.52, C                   | -                                | -                                                                                                                                        | -                                                                                                                                               |
|                    | $\alpha$ -C                 | 53.44, CH                   | 4.45, ddd (4.31, 7.18, 12.09)    | Leu <sup>3</sup> -CO, Leu <sup>3</sup> - $\beta$ ,<br>Leu <sup>3</sup> - $\gamma$                                                        | Val <sup>4</sup> -NH                                                                                                                            |
|                    | $\beta$ -C                  | 41.44, CH <sub>2</sub>      | 1.61, m<br>1.64, m               | Leu <sup>3</sup> -CO, Leu <sup>3</sup> - $\alpha$ ,<br>Leu <sup>3</sup> - $\gamma$                                                       | Val <sup>4</sup> -NH                                                                                                                            |
|                    | $\gamma$ -C                 | 25.70, CH                   | 1.64, m                          | Leu <sup>3</sup> - $\alpha$ , Leu <sup>3</sup> - $\beta$                                                                                 | Val <sup>4</sup> -NH                                                                                                                            |
|                    | $\delta$ -C                 | 22.07, CH <sub>3</sub>      | 0.91, d (4.31)                   | Leu <sup>3</sup> - $\beta$ , Leu <sup>3</sup> - $\gamma$ , Leu <sup>3</sup> - $\delta'$                                                  | -                                                                                                                                               |
|                    | $\delta'$ -C                | 23.26, CH <sub>3</sub>      | 0.97, d (4.31)                   | Leu <sup>3</sup> - $\beta$ , Leu <sup>3</sup> - $\gamma$ , Leu <sup>3</sup> - $\delta$                                                   | -                                                                                                                                               |
| L-Val <sup>4</sup> | NH                          | -                           | 8.22, d (7.32)                   | Val <sup>4</sup> - $\alpha$ , Val <sup>4</sup> - $\beta$ , Leu <sup>3</sup> -CO                                                          | Leu <sup>3</sup> - $\alpha$ , Leu <sup>3</sup> - $\beta$ , Leu <sup>3</sup> - $\gamma$                                                          |
|                    | C=O                         | 173.35 C                    | -                                | -                                                                                                                                        | -                                                                                                                                               |
|                    | $\alpha$ -C                 | 61.26, CH                   | 4.09, dd (5.54, 7.32)            | Val <sup>4</sup> -CO, Val <sup>4</sup> - $\beta$ ,<br>Val <sup>4</sup> - $\gamma$ , Val <sup>4</sup> - $\gamma'$                         | Asp <sup>5</sup> -NH                                                                                                                            |
|                    | $\beta$ -C                  | 30.89, CH                   | 2.20, ddd (5.54, 7.32, 13.92)    | Val <sup>4</sup> - $\alpha$ , Val <sup>4</sup> - $\gamma$ , Val <sup>4</sup> - $\gamma'$                                                 | Asp <sup>5</sup> -NH                                                                                                                            |
|                    | $\gamma$ -C                 | 19.62, CH <sub>3</sub>      | 0.97, d (5.54)                   | Val <sup>4</sup> - $\beta$ , Val <sup>4</sup> - $\gamma'$                                                                                | Asp <sup>5</sup> -NH                                                                                                                            |
|                    | $\gamma'$ -C                | 18.31, CH <sub>3</sub>      | 0.92, d (5.54)                   | Val <sup>4</sup> - $\beta$ , Val <sup>4</sup> - $\gamma$                                                                                 | Asp <sup>5</sup> -NH                                                                                                                            |
| L-Asp <sup>5</sup> | NH                          | -                           | 8.28, d (7.46)                   | Val <sup>4</sup> -CO, Asp <sup>5</sup> - $\alpha$                                                                                        | Val <sup>4</sup> - $\alpha$ , Val <sup>4</sup> - $\beta$ , Val <sup>4</sup> - $\gamma$ ,<br>Val <sup>4</sup> - $\gamma'$ , Leu <sup>6</sup> -NH |
|                    | C=O                         | 173.11, C                   | -                                | -                                                                                                                                        | -                                                                                                                                               |
|                    | $\alpha$ -C                 | 52.11, CH                   | 4.70, dd (7.46, 13.76)           | Asp <sup>5</sup> -CO, Asp <sup>5</sup> - $\beta$ ,<br>Asp <sup>5</sup> - $\gamma$ -C=O                                                   | Leu <sup>6</sup> -NH                                                                                                                            |
|                    | $\beta$ -C                  | 37.64, CH <sub>2</sub>      | 2.84, d (7.46)                   | Asp <sup>5</sup> -CO, Asp <sup>5</sup> - $\alpha$ ,<br>Asp <sup>5</sup> - $\gamma$ -C=O                                                  | Leu <sup>6</sup> -NH                                                                                                                            |
|                    | $\gamma$ -C=O               | 175.07, CO <sup>2</sup>     | -                                | -                                                                                                                                        | -                                                                                                                                               |
| D-Leu <sup>6</sup> | NH                          | -                           | 7.85, d (8.32)                   | Asp <sup>5</sup> -CO                                                                                                                     | Asp <sup>5</sup> - $\alpha$ , Asp <sup>5</sup> -NH, Ile <sup>6</sup> -NH                                                                        |
|                    | C=O                         | 173.60, C                   | -                                | -                                                                                                                                        | -                                                                                                                                               |
|                    | $\alpha$ -C                 | 52.91, CH                   | 4.51, ddd (5.21, 8.32, 14.15)    | Leu <sup>6</sup> -CO, Leu <sup>6</sup> - $\beta$ ,<br>Leu <sup>6</sup> -CO, Leu <sup>6</sup> - $\alpha$ ,<br>Leu <sup>6</sup> - $\gamma$ | Ile <sup>7</sup> -NH                                                                                                                            |
|                    | $\beta$ -C                  | 41.49, CH <sub>2</sub>      | 1.70, m<br>1.60, m               | Leu <sup>6</sup> - $\alpha$ , Leu <sup>6</sup> - $\beta$                                                                                 | Ile <sup>7</sup> -NH                                                                                                                            |
|                    | $\gamma$ -C                 | 25.86, CH                   | 1.64, m                          | Leu <sup>6</sup> - $\alpha$ , Leu <sup>6</sup> - $\beta$                                                                                 | Ile <sup>7</sup> -NH                                                                                                                            |
|                    | $\delta$ -C                 | 22.07, CH <sub>3</sub>      | 0.91, d (1.68)                   | Leu <sup>6</sup> - $\beta$ , Leu <sup>6</sup> - $\delta$                                                                                 | -                                                                                                                                               |
|                    | $\delta'$ -C                | 22.65, CH <sub>3</sub>      | 0.94, d (1.89)                   | Leu <sup>6</sup> - $\beta$ , Leu <sup>6</sup> - $\delta'$                                                                                | -                                                                                                                                               |

| Unit               | Pos.         | $\delta_C$ , Mult.                  | $\delta_H$ (J in Hz)                             | HMBC                                                                                                                     | ROESY <sup>a</sup>                                                                                              |
|--------------------|--------------|-------------------------------------|--------------------------------------------------|--------------------------------------------------------------------------------------------------------------------------|-----------------------------------------------------------------------------------------------------------------|
| L-Ile <sup>7</sup> | NH           | -                                   | 8.07, d (8.47)                                   | Leu <sup>6</sup> -CO                                                                                                     | Leu <sup>6</sup> -NH, Leu <sup>6</sup> - $\alpha$ , Leu <sup>6</sup> - $\beta$ ,<br>Leu <sup>6</sup> - $\gamma$ |
|                    | C=O          | 172.13, C                           | -                                                | -                                                                                                                        | -                                                                                                               |
|                    | $\alpha$ -C  | 58.30, CH                           | 4.36, dd (5.29, 8.47)                            | Ile <sup>7</sup> -CO, Ile <sup>7</sup> - $\beta$ , Ile <sup>7</sup> - $\gamma$ ,<br>Ile <sup>7</sup> - $\delta$          | -                                                                                                               |
|                    | $\beta$ -C   | 38.24, CH                           | 1.93, q (8.47)                                   | Ile <sup>7</sup> - $\beta$ , Ile <sup>7</sup> - $\gamma$ ,<br>Ile <sup>7</sup> - $\delta$ , Ile <sup>7</sup> - $\delta'$ | -                                                                                                               |
|                    | $\gamma$ -C  | 25.99, CH <sub>2</sub> a.<br>b      | 1.41, m<br>1.20, m                               | Ile <sup>7</sup> - $\beta$ , Ile <sup>7</sup> - $\delta$ , Ile <sup>7</sup> - $\delta'$                                  | -                                                                                                               |
|                    | $\delta$ -C  | 15.93, CH <sub>3</sub>              | 0.92, d (3.66)                                   | Ile <sup>7</sup> - $\alpha$ , Ile <sup>7</sup> - $\beta$ , Ile <sup>7</sup> - $\gamma$                                   | -                                                                                                               |
|                    | $\delta'$ -C | 11.77, CH <sub>3</sub>              | 0.89, t (3.12)                                   | Ile <sup>7</sup> - $\beta$ , Ile <sup>7</sup> - $\gamma$                                                                 | -                                                                                                               |
| Fatty acid         | C=O          | 172.55, C                           | -                                                | -                                                                                                                        | -                                                                                                               |
|                    | 2            | 41.96, CH <sub>2</sub> a.<br>b      | 2.62, dd (5.02, 12.97)<br>2.43, dd (7.46, 12.97) | FA-3, FA-4, FA-CO                                                                                                        | Gln <sup>1</sup> -NH                                                                                            |
|                    | 3            | 73.83, CH                           | 5.15 ddd (5.02, 7.46, 12.97)                     | FA-4, FA-CO                                                                                                              | Gln <sup>1</sup> -NH                                                                                            |
|                    | 4            | 35.14, CH <sub>2</sub> a.<br>b      | 1.77, m<br>1.65, m                               | FA-2-a, FA-2-b, FA-3<br>FA-3, FA-5-9                                                                                     | -<br>-                                                                                                          |
|                    | ai           | 5                                   | 26.32, CH <sub>2</sub> <sup>*</sup>              | 1.35 <sup>b</sup> , m                                                                                                    | FA-5-9, FA-10, FA-11                                                                                            |
| ai                 | 6            | 27.98, CH <sub>2</sub> <sup>*</sup> | 1.29 <sup>b</sup> , m                            | FA-5-9, FA-10, FA-11                                                                                                     | -                                                                                                               |
| ai                 | 7            | 30.24, CH <sub>2</sub> <sup>*</sup> | 1.29 <sup>b</sup> , m                            | FA-5-9, FA-10, FA-11                                                                                                     | -                                                                                                               |
| ai                 | 8            | 30.53, CH <sub>2</sub> <sup>*</sup> | 1.29 <sup>b</sup> , m                            | FA-5-9, FA-10, FA-11                                                                                                     | -                                                                                                               |
| ai                 | 9            | 37.67, CH <sub>2</sub> a.<br>b      | 1.09, m<br>1.29, m                               | FA-5-9, FA-10, FA-11                                                                                                     | -                                                                                                               |
| ai                 | 10           | 35.54, CH                           | 1.29 <sup>b</sup> , m                            | FA-11, FA-5-9                                                                                                            | -                                                                                                               |
| ai                 | 11           | 30.53, CH <sub>2</sub> a.<br>b      | 1.29 <sup>b</sup> , m<br>1.13 <sup>b</sup> , m   | FA-10, FA-12, FA-13                                                                                                      | -                                                                                                               |
| ai                 | 12           | 19.50, CH <sub>3</sub>              | 0.85, t (4.54)                                   | FA-10                                                                                                                    | -                                                                                                               |
| ai                 | 13           | 11.63, CH <sub>3</sub>              | 0.86, d (5.32)                                   | FA-9, FA-10, FA-11                                                                                                       | -                                                                                                               |
| i                  | 5            | 26.33, CH <sub>2</sub> <sup>*</sup> | 1.35 <sup>b</sup> , m                            | FA-5-9, FA-10, FA-11                                                                                                     | -                                                                                                               |
| i                  | 6            | 28.36, CH <sub>2</sub> <sup>*</sup> | 1.29 <sup>b</sup> , m                            | FA-5-9, FA-10, FA-11                                                                                                     | -                                                                                                               |
| i                  | 7            | 30.28, CH <sub>2</sub> <sup>*</sup> | 1.29 <sup>b</sup> , m                            | FA-5-9, FA-10, FA-11                                                                                                     | -                                                                                                               |
| i                  | 8            | 30.78, CH <sub>2</sub> <sup>*</sup> | 1.29 <sup>b</sup> , m                            | FA-5-9, FA-10, FA-11                                                                                                     | -                                                                                                               |
| i                  | 9            | 26.32, CH <sub>2</sub>              | 1.29 <sup>b</sup> , m                            | FA-10, FA-12, FA-13                                                                                                      | -                                                                                                               |
| i                  | 10           | 40.13, CH <sub>2</sub>              | 1.17 <sup>b</sup> , m                            | FA-11, FA-12, FA-13                                                                                                      | -                                                                                                               |
| i                  | 11           | 29.02, CH                           | 1.51, ept (6.65)                                 | FA-10, FA-12, FA-13                                                                                                      | -                                                                                                               |
| i                  | 12           | 22.91, CH <sub>3</sub>              | 0.87, d (6.65)                                   | FA-9, FA-11, FA-13                                                                                                       | -                                                                                                               |
| i                  | 13           | 22.91, CH <sub>3</sub>              | 0.87, d (6.65)                                   | FA-9, FA-11, FA-12                                                                                                       | -                                                                                                               |

<sup>a</sup> Sequential ROEs <sup>b</sup> Overlapped signals prevent determination of constant couplings \* May be interchanged.

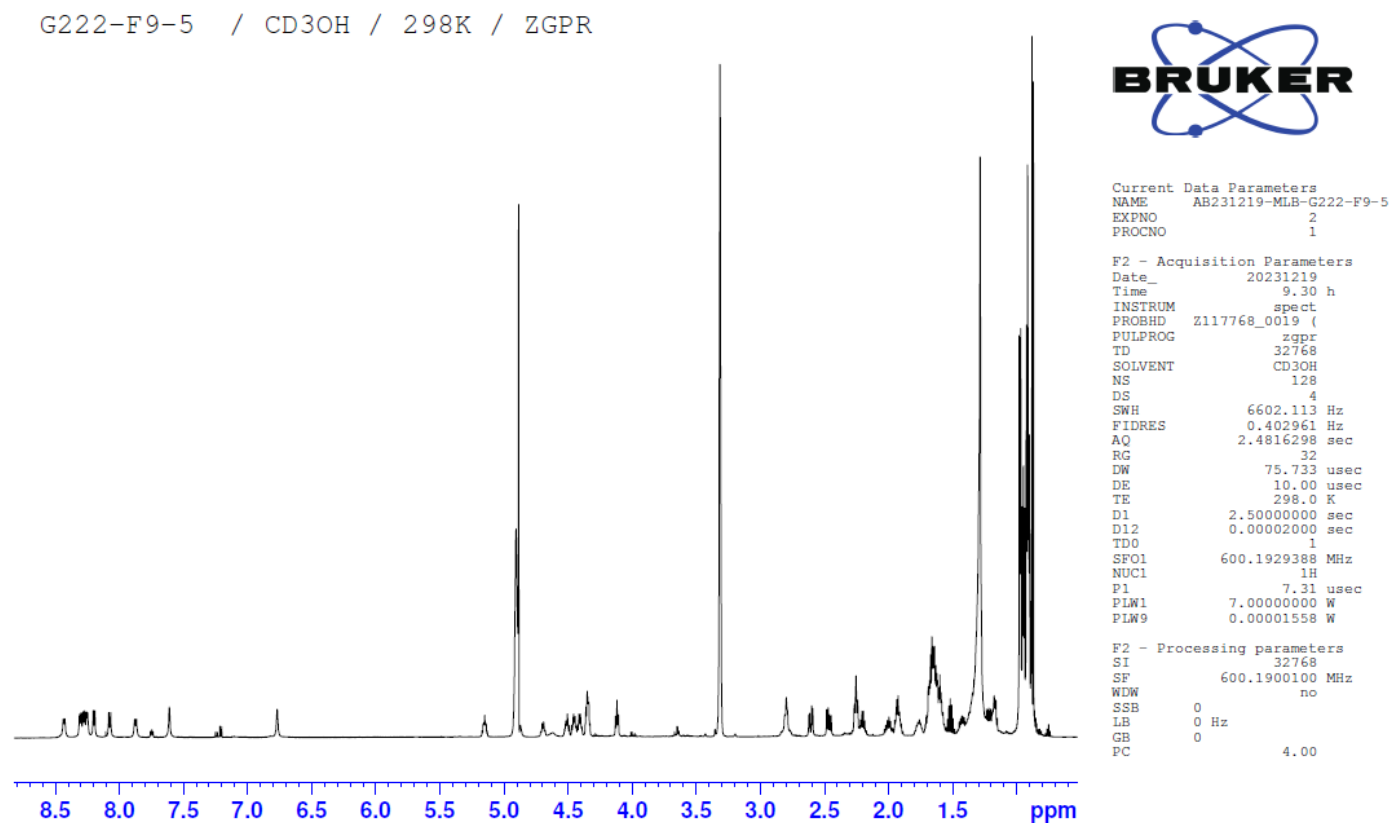

**Figure S28:**  $^1\text{H}$ -NMR spectrum of Lichenysin (**5a** and **5b**) ( $m/z$  1021.6896  $[\text{M} + \text{H}]^+$ ) (600 MHz,  $\text{CD}_3\text{OH}$ ).

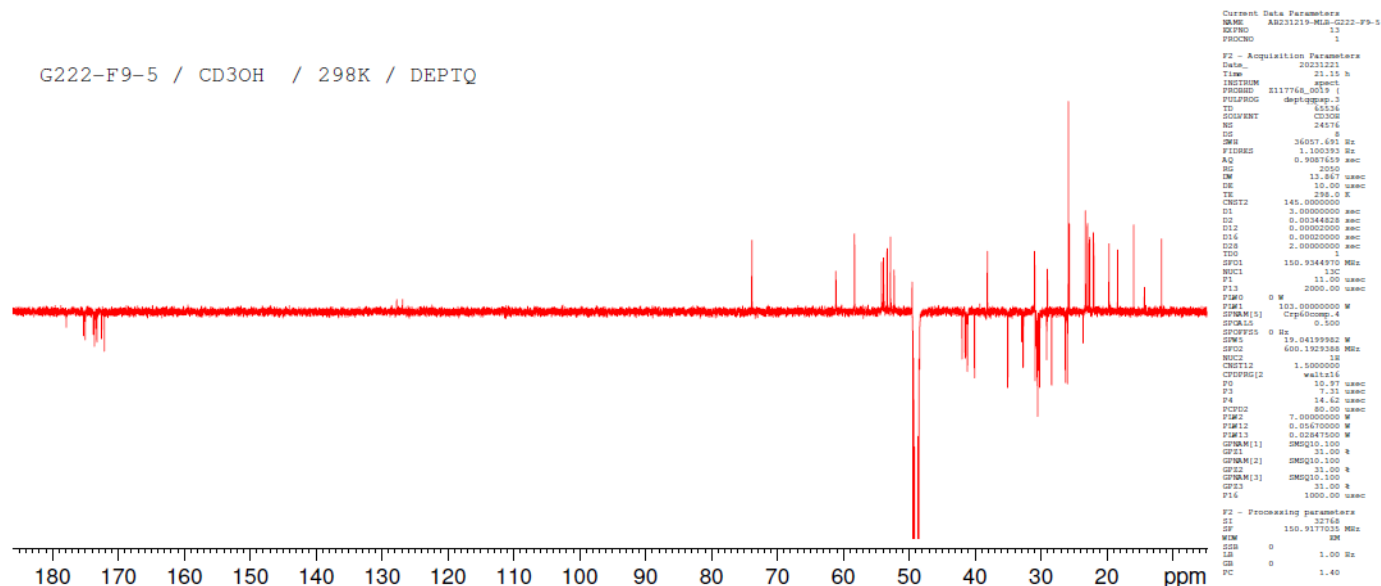

**Figure S29:** DEPTQ spectrum of Lichenysin (**5a** and **5b**) ( $m/z$  1021.6896  $[\text{M} + \text{H}]^+$ ) (600 MHz,  $\text{CD}_3\text{OH}$ ).

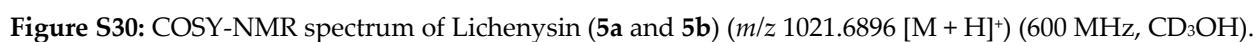

**Figure S30:** COSY-NMR spectrum of Lichenysin (**5a** and **5b**) ( $m/z$  1021.6896  $[M + H]^+$ ) (600 MHz,  $CD_3OH$ ).

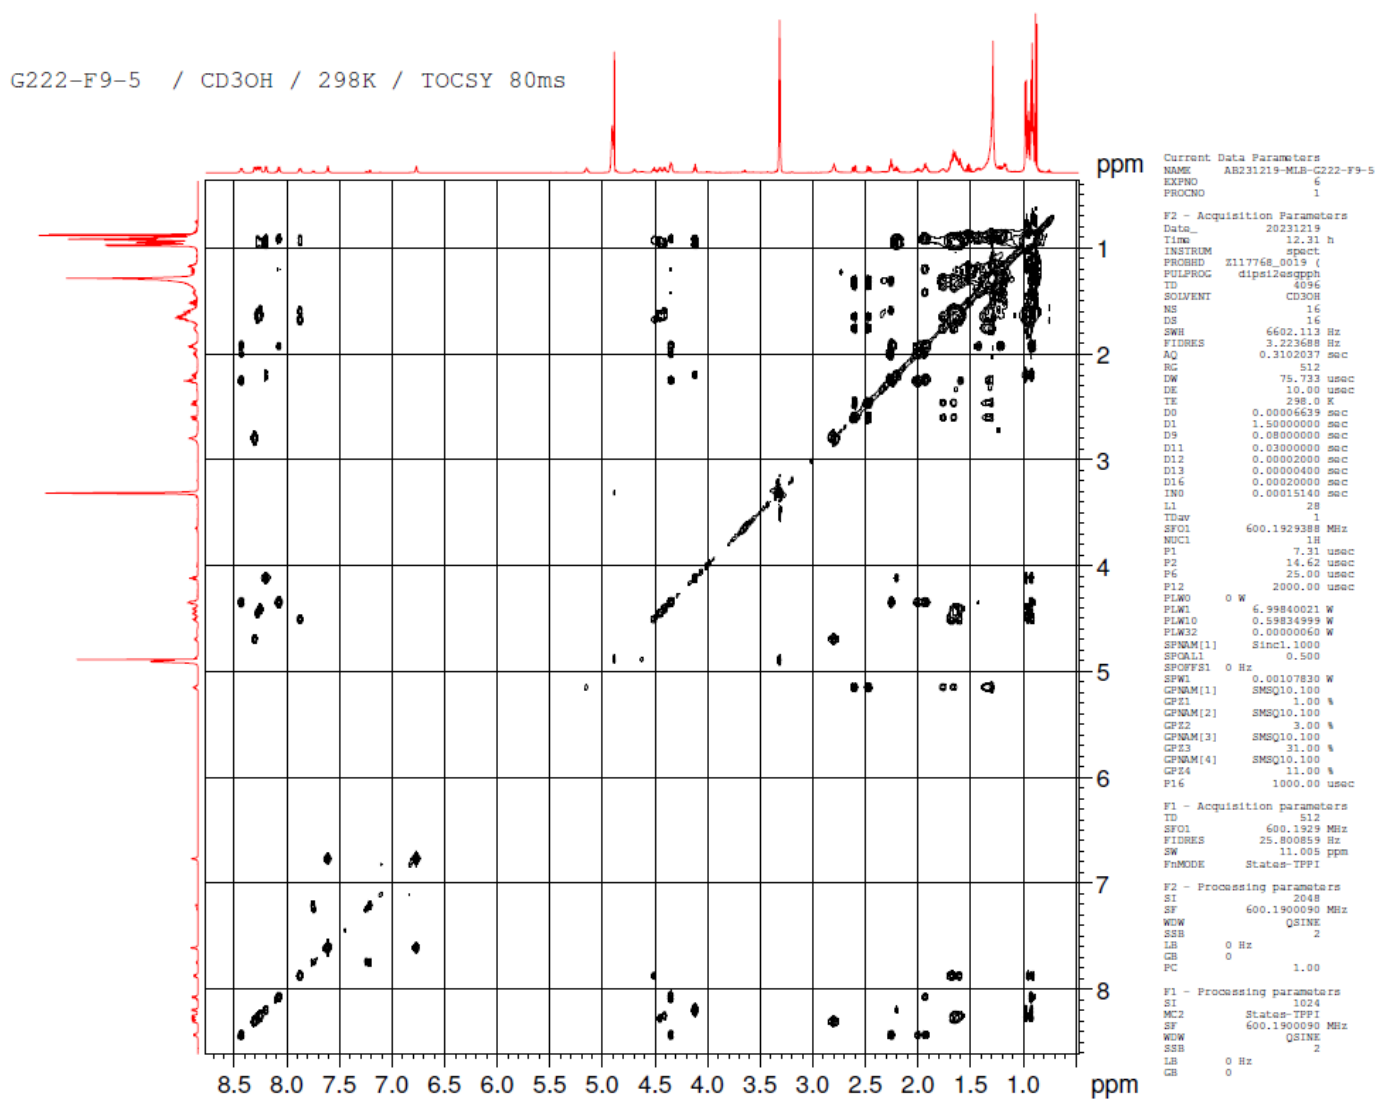

Figure S31: TOCSY-NMR spectrum of Lichenysin (5a and 5b) ( $m/z$  1021.6896  $[M + H]^+$ ) (600 MHz, CD<sub>3</sub>OH).

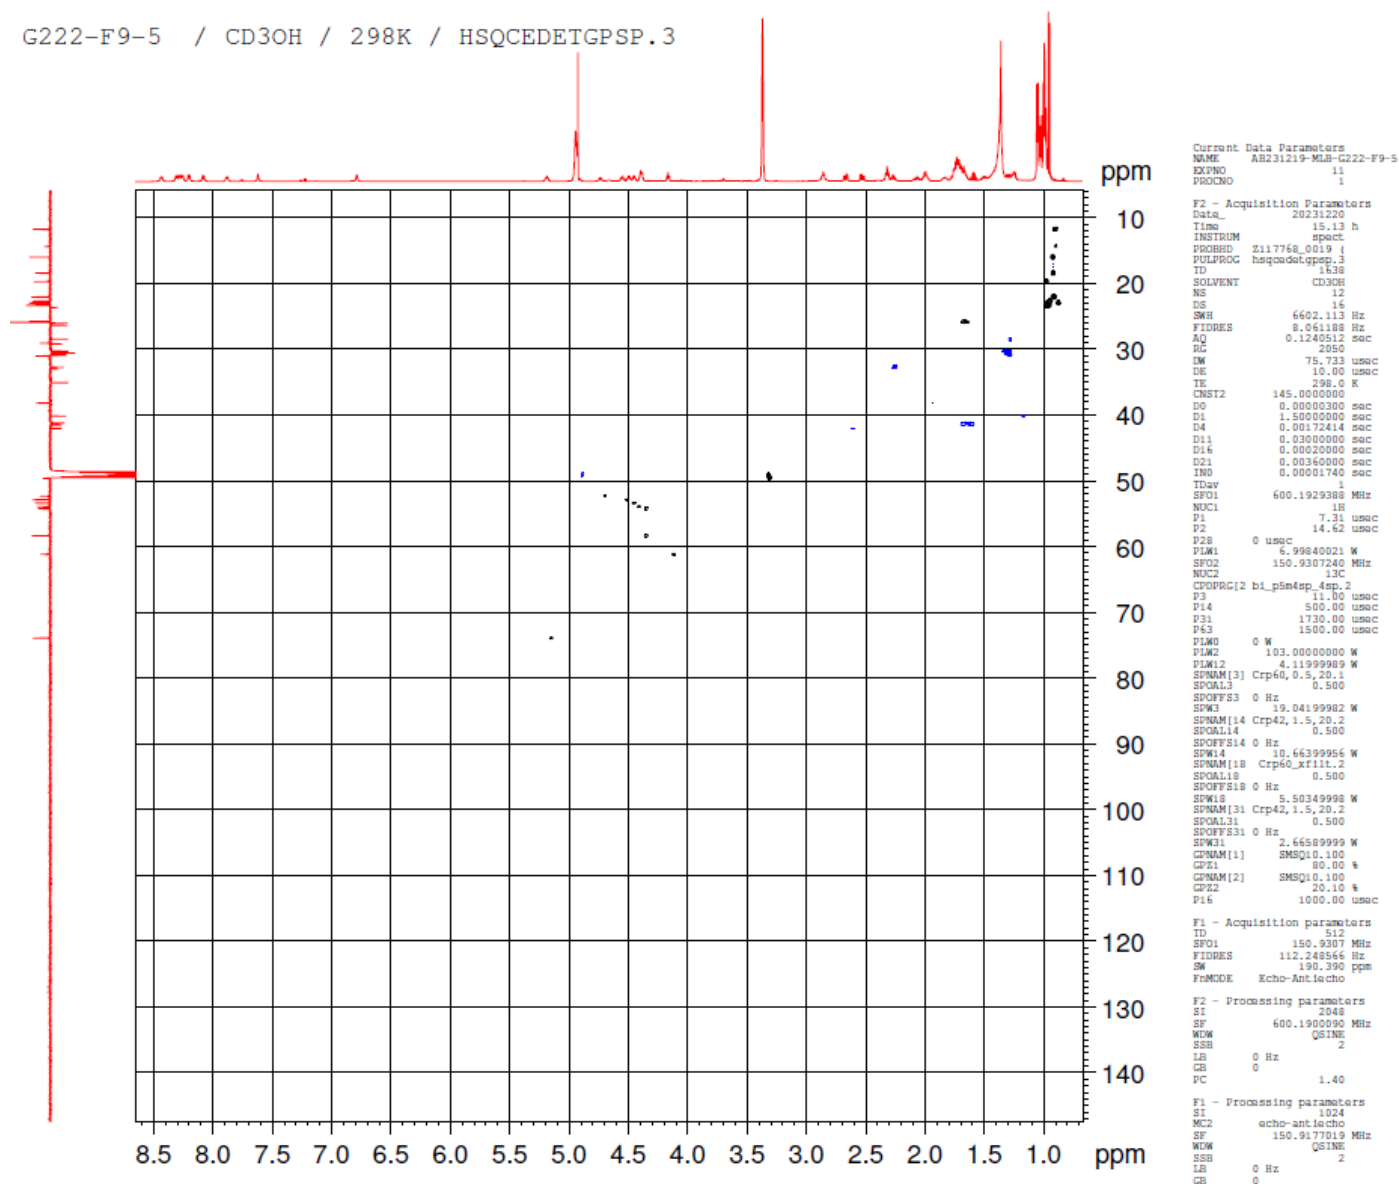

Figure S32: HSQC-NMR spectrum of Lichenysin (5a and 5b) ( $m/z$  1021.6896  $[M + H]^+$ ) (600 MHz, CD<sub>3</sub>OH).

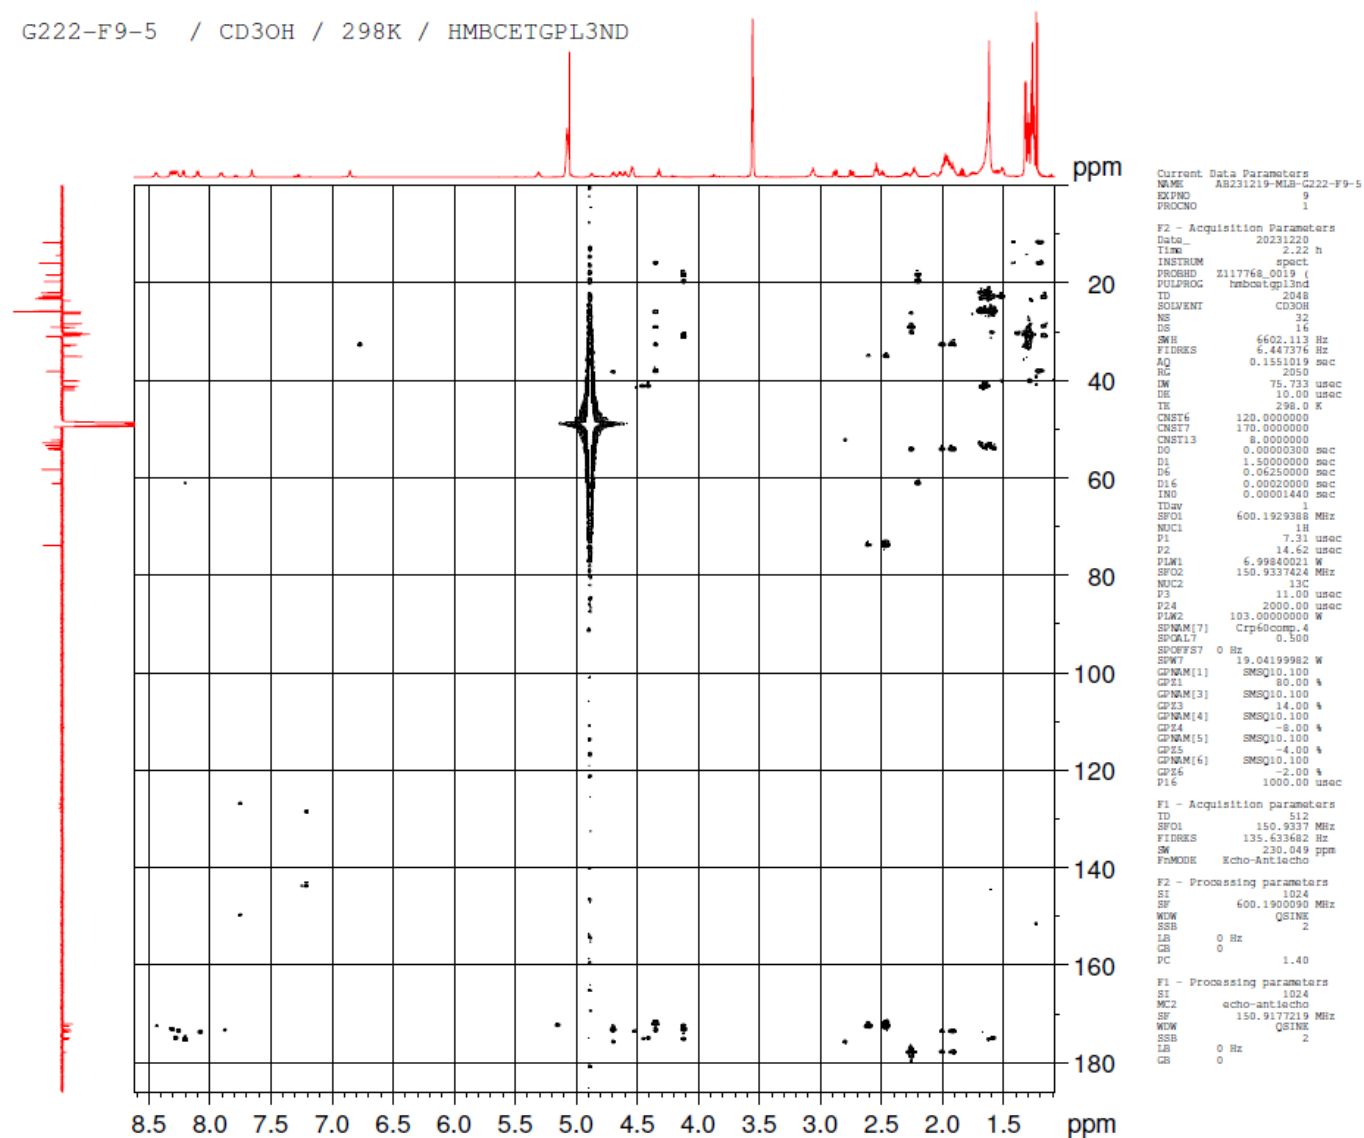

Figure S33: HMBC-NMR spectrum of Lichenysin (5a and 5b) ( $m/z$  1021.6896  $[M + H]^+$ ) (600 MHz, CD<sub>3</sub>OH).



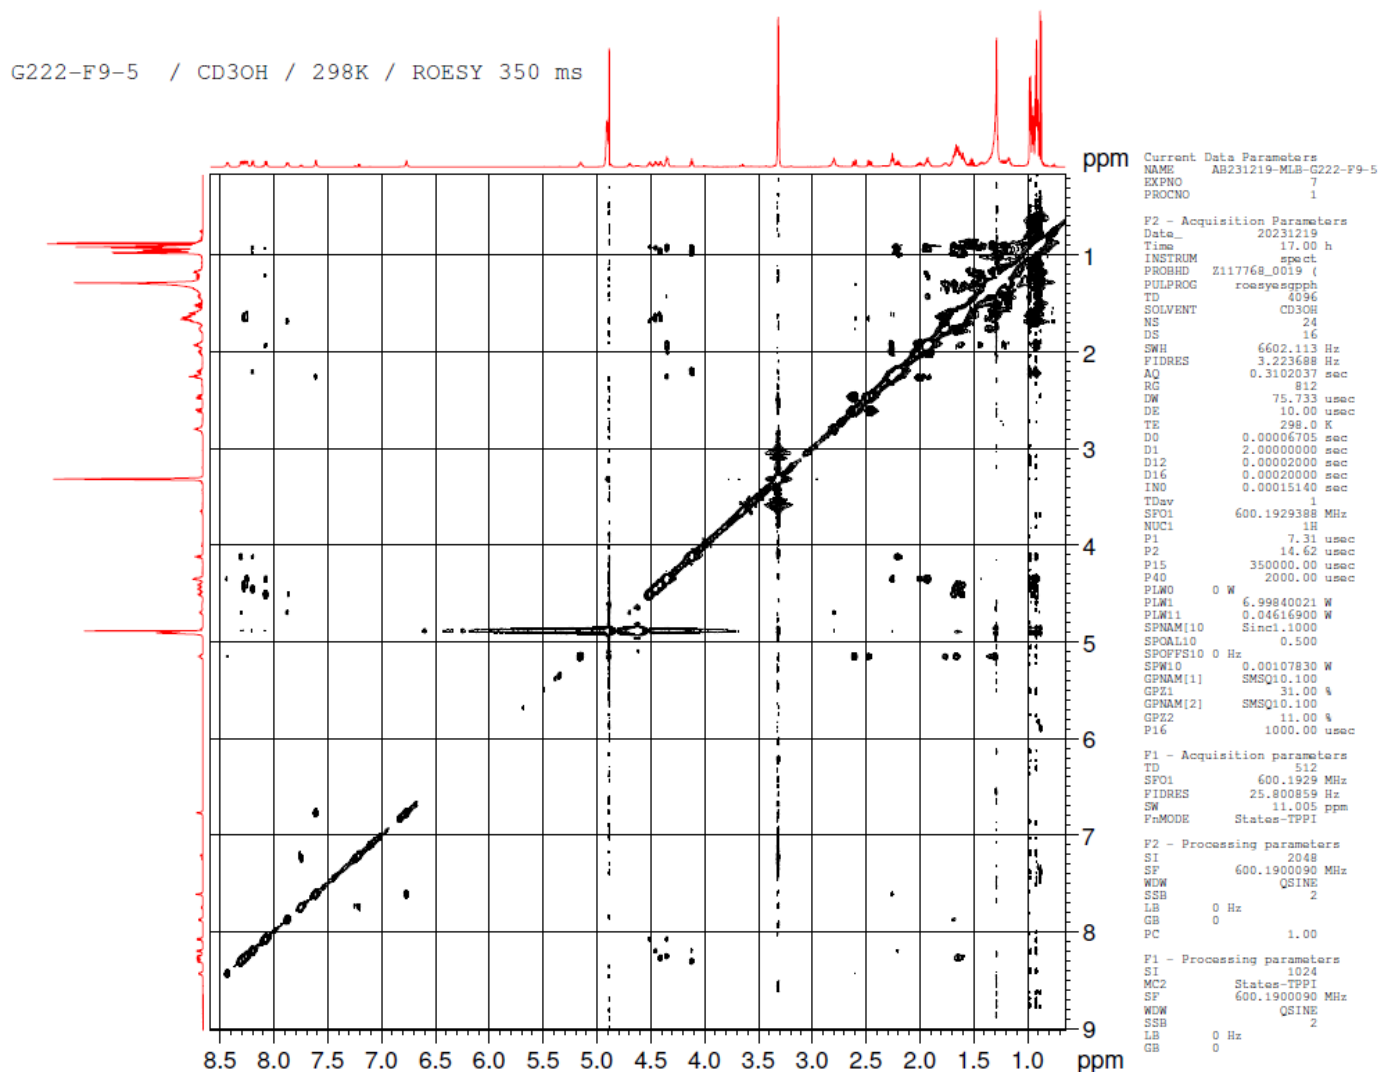

Figure S34: ROESY-NMR spectrum of Lichenysin (5a and 5b) ( $m/z$  1021.6896  $[M + H]^+$ ) (600 MHz, CD<sub>3</sub>OH).

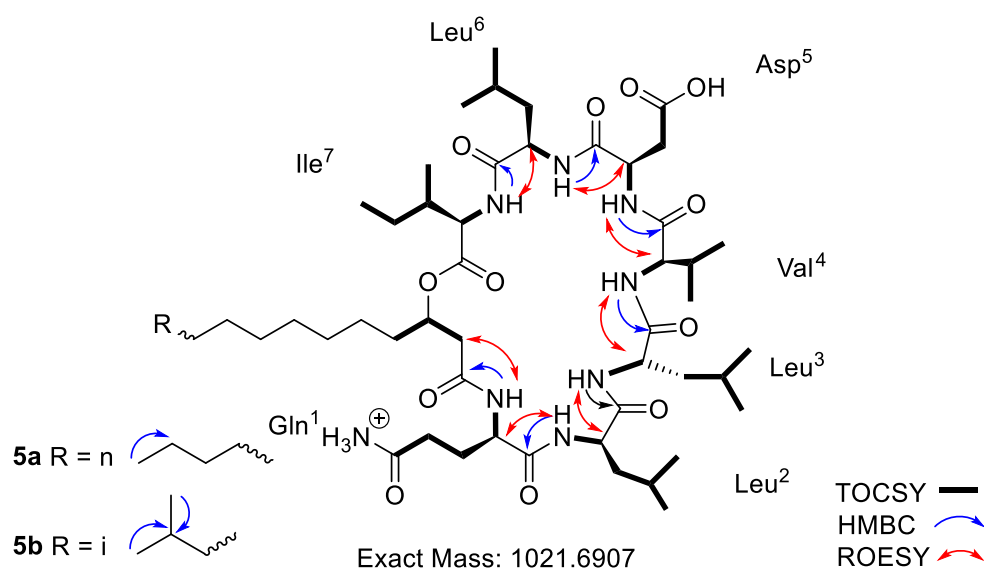

Figure S35: Structure of Lichenysins (5a and 5b) ( $m/z$  1021.6896  $[M + H]^+$ ).

**Table S17.**  $^1\text{H}$ ,  $^{13}\text{C}$ , HMBC, and ROESY NMR data of Lichenysin (**5a** and **5b**) ( $m/z$  1021.6896  $[\text{M} + \text{H}]^+$ ) (600 MHz,  $\text{CD}_3\text{OH}$ ) isoform: *iso* and *n* (0.5:0.5).

| Unit               | Pos.                        | $\delta_{\text{C}}$ , Mult.     | $\delta_{\text{H}}$ (J in Hz) | HMBC                                                                                                                     | ROESY <sup>a</sup>                                                                                                                              |
|--------------------|-----------------------------|---------------------------------|-------------------------------|--------------------------------------------------------------------------------------------------------------------------|-------------------------------------------------------------------------------------------------------------------------------------------------|
| L-Gln <sup>1</sup> | NH                          | -                               | 8.43, d (7.72)                | FA-CO                                                                                                                    | FA-2-a, FA-2-b, FA-3                                                                                                                            |
|                    | C=O                         | 173.63, C                       | -                             | -                                                                                                                        | -                                                                                                                                               |
|                    | $\alpha$ -C                 | 54.19, CH                       | 4.34, ddd (4.72, 7.72, 10.13) | Gln <sup>1</sup> -CO, FA-CO                                                                                              | Leu <sup>2</sup> -NH                                                                                                                            |
|                    | $\beta$ -C                  | 29.13, CH <sub>2</sub> a.<br>b. | 1.98, m<br>1.91, m            | Gln <sup>1</sup> -CO, Gln <sup>1</sup> - $\alpha$ ,<br>Gln <sup>1</sup> - $\gamma$ , Gln <sup>1</sup> - $\delta$ -C=O    | Leu <sup>2</sup> -NH                                                                                                                            |
|                    | $\gamma$ -C                 | 32.72, CH <sub>2</sub>          | 2.25, t (7.72)                | Gln <sup>1</sup> - $\alpha$ , Gln <sup>1</sup> - $\beta$ ,<br>Gln <sup>1</sup> - $\delta$ -C=O                           | Leu <sup>2</sup> -NH                                                                                                                            |
|                    | $\delta$ -C=O               | 177.89, CO <sup>2</sup>         | -                             | -                                                                                                                        | -                                                                                                                                               |
|                    | $\epsilon$ -NH <sub>2</sub> | - a.<br>b.                      | 7.61, brs<br>6.80 brs         | Gln <sup>1</sup> - $\delta$ -C=O, Gln <sup>1</sup> - $\gamma$                                                            | -                                                                                                                                               |
| L-Leu <sup>2</sup> | NH                          | -                               | 8.24, d (5.82)                | Leu <sup>2</sup> - $\alpha$ , Leu <sup>2</sup> - $\beta$ , Gln <sup>1</sup> -<br>CO                                      | Gln <sup>1</sup> - $\alpha$ , Gln <sup>1</sup> - $\beta$ , Gln <sup>1</sup> - $\gamma$                                                          |
|                    | C=O                         | 175.01, C                       | -                             | -                                                                                                                        | -                                                                                                                                               |
|                    | $\alpha$ -C                 | 53.90, CH                       | 4.41, ddd (2.26, 5.82, 7.62)  | Leu <sup>2</sup> -CO, Leu <sup>2</sup> - $\beta$ ,<br>Leu <sup>2</sup> - $\gamma$ , Gln <sup>1</sup> -CO                 | Leu <sup>3</sup> -NH                                                                                                                            |
|                    | $\beta$ -C                  | 41.18, CH <sub>2</sub> a.<br>b. | 1.63 m<br>1.59 m              | Leu <sup>2</sup> -CO, Leu <sup>2</sup> - $\alpha$ ,<br>Leu <sup>2</sup> - $\gamma$                                       | Leu <sup>3</sup> -NH                                                                                                                            |
|                    | $\gamma$ -C                 | 25.87, CH                       | 1.64, m                       | Leu <sup>2</sup> - $\alpha$ , Leu <sup>2</sup> - $\beta$ ,<br>Leu <sup>2</sup> - $\delta$ , Leu <sup>2</sup> - $\delta'$ | Leu <sup>3</sup> -NH                                                                                                                            |
|                    | $\delta$ -C                 | 23.27, CH <sub>3</sub>          | 0.95, d (2.26)                | Leu <sup>2</sup> - $\gamma$ , Leu <sup>2</sup> - $\delta'$                                                               | -                                                                                                                                               |
|                    | $\delta'$ -C                | 23.27, CH <sub>3</sub>          | 0.97, d (2.26)                | Leu <sup>2</sup> - $\gamma$ , Leu <sup>2</sup> - $\delta$                                                                | -                                                                                                                                               |
| D-Leu <sup>3</sup> | NH                          | -                               | 8.27, d (7.31)                | Leu <sup>2</sup> -CO, Leu <sup>3</sup> - $\alpha$                                                                        | Leu <sup>2</sup> - $\alpha$ , Leu <sup>2</sup> - $\beta$ , Leu <sup>2</sup> - $\gamma$                                                          |
|                    | C=O                         | 175.23, C                       | -                             | -                                                                                                                        | -                                                                                                                                               |
|                    | $\alpha$ -C                 | 53.36, CH                       | 4.45, ddd (5.08, 7.31, 11.85) | Leu <sup>3</sup> -CO, Leu <sup>3</sup> - $\beta$ ,<br>Leu <sup>3</sup> - $\gamma$                                        | Val <sup>4</sup> -NH                                                                                                                            |
|                    | $\beta$ -C                  | 41.24, CH <sub>2</sub> a.<br>b. | 1.63, m<br>1.61, m            | Leu <sup>3</sup> -CO, Leu <sup>3</sup> - $\alpha$ ,<br>Leu <sup>3</sup> - $\gamma$                                       | Val <sup>4</sup> -NH                                                                                                                            |
|                    | $\gamma$ -C                 | 25.72, CH                       | 1.64, m                       | Leu <sup>3</sup> - $\alpha$ , Leu <sup>3</sup> - $\beta$                                                                 | Val <sup>4</sup> -NH                                                                                                                            |
|                    | $\delta$ -C                 | 23.00, CH <sub>3</sub>          | 0.97, d (1.69)                | Leu <sup>3</sup> - $\gamma$ , Leu <sup>3</sup> - $\delta'$                                                               | -                                                                                                                                               |
|                    | $\delta'$ -C                | 22.05, CH <sub>3</sub>          | 0.91, d (1.69)                | Leu <sup>3</sup> - $\gamma$ , Leu <sup>3</sup> - $\delta$                                                                | -                                                                                                                                               |
| L-Val <sup>4</sup> | NH                          | -                               | 8.19, d (7.72)                | Val <sup>4</sup> - $\alpha$ , Leu <sup>3</sup> -CO                                                                       | Leu <sup>3</sup> - $\alpha$ , Leu <sup>3</sup> - $\beta$ , Leu <sup>3</sup> - $\gamma$                                                          |
|                    | C=O                         | 173.28, C                       | -                             | -                                                                                                                        | -                                                                                                                                               |
|                    | $\alpha$ -C                 | 61.17, CH                       | 4.14, dd (7.72, 13.83)        | Val <sup>4</sup> -CO, Val <sup>4</sup> - $\beta$ ,<br>Val <sup>4</sup> - $\gamma$ , Val <sup>4</sup> - $\gamma'$         | Asp <sup>5</sup> -NH                                                                                                                            |
|                    | $\beta$ -C                  | 31.03, CH                       | 2.20, ddd (3.85, 6.93, 11.80) | Val <sup>4</sup> - $\alpha$ , Val <sup>4</sup> - $\gamma$ , Val <sup>4</sup> - $\gamma'$                                 | Asp <sup>5</sup> -NH                                                                                                                            |
|                    | $\gamma$ -C                 | 19.69, CH <sub>3</sub>          | 0.97, d (1.89)                | Val <sup>4</sup> - $\alpha$ , Val <sup>4</sup> - $\beta$ , Val <sup>4</sup> - $\gamma'$                                  | Asp <sup>5</sup> -NH                                                                                                                            |
|                    | $\gamma'$ -C                | 18.41, CH <sub>3</sub>          | 0.92, d (1.89)                | Val <sup>4</sup> - $\alpha$ , Val <sup>4</sup> - $\beta$ , Val <sup>4</sup> - $\gamma$                                   | Asp <sup>5</sup> -NH                                                                                                                            |
| L-Asp <sup>5</sup> | NH                          | -                               | 8.31, d (7.53)                | Val <sup>4</sup> -CO                                                                                                     | Val <sup>4</sup> - $\alpha$ , Val <sup>4</sup> - $\beta$ , Val <sup>4</sup> - $\gamma$ ,<br>Val <sup>4</sup> - $\gamma'$ , Leu <sup>6</sup> -NH |
|                    | C=O                         | 173.41, C                       | -                             | -                                                                                                                        | -                                                                                                                                               |
|                    | $\alpha$ -C                 | 52.30, CH                       | 4.69, dd (7.53, 13.75)        | Asp <sup>5</sup> -CO, Asp <sup>5</sup> - $\beta$ ,<br>Asp <sup>5</sup> - $\gamma$ -C=O                                   | Leu <sup>6</sup> -NH                                                                                                                            |

|                    |               |                                                      |                               |                                                                                                                 |                                                                                                                 |
|--------------------|---------------|------------------------------------------------------|-------------------------------|-----------------------------------------------------------------------------------------------------------------|-----------------------------------------------------------------------------------------------------------------|
|                    | $\beta$ -C    | 38.31, CH <sub>2</sub>                               | 2.81, dd (7.53, 13.75)        | Asp <sup>5</sup> -CO, Asp <sup>5</sup> - $\alpha$ ,<br>Asp <sup>5</sup> - $\gamma$ -C=O                         | Leu <sup>6</sup> -NH                                                                                            |
|                    | $\gamma$ -C=O | 175.82, CO <sup>2</sup>                              | -                             | -                                                                                                               | -                                                                                                               |
| D-Leu <sup>6</sup> | NH            | -                                                    | 7.88, d (8.69)                | Asp <sup>5</sup> -CO                                                                                            | Asp <sup>5</sup> - $\alpha$ , Asp <sup>5</sup> -NH, Ile <sup>6</sup> -NH                                        |
|                    | C=O           | 173.80, C                                            | -                             | -                                                                                                               | -                                                                                                               |
|                    | $\alpha$ -C   | 52.89, CH                                            | 4.51 ddd (5.12, 8.69, 13.32)  | Leu <sup>6</sup> -CO, Leu <sup>6</sup> - $\beta$ ,                                                              | Ile <sup>7</sup> -NH                                                                                            |
|                    | $\beta$ -C    | 41.50, CH <sub>2</sub> <sup>a.</sup><br><sup>b</sup> | 1.68, m<br>1.61, m            | Leu <sup>6</sup> -CO, Leu <sup>6</sup> - $\alpha$ ,<br>Leu <sup>6</sup> - $\gamma$                              | Ile <sup>7</sup> -NH                                                                                            |
|                    | $\gamma$ -C   | 25.86, CH                                            | 1.64, m                       | Leu <sup>6</sup> - $\alpha$ , Leu <sup>6</sup> - $\beta$                                                        | Ile <sup>7</sup> -NH                                                                                            |
|                    | $\delta$ -C   | 21.98, CH <sub>3</sub>                               | 0.91, d (1.68)                | Leu <sup>6</sup> - $\beta$ , Leu <sup>3</sup> - $\delta$                                                        | -                                                                                                               |
|                    | $\delta'$ -C  | 22.65, CH <sub>3</sub>                               | 0.94, d (1.89)                | Leu <sup>6</sup> - $\beta$ , Leu <sup>6</sup> - $\delta'$                                                       | -                                                                                                               |
| L-Ile <sup>7</sup> | NH            | -                                                    | 8.07, d (8.53)                | Leu <sup>6</sup> -CO                                                                                            | Leu <sup>6</sup> -NH, Leu <sup>6</sup> - $\alpha$ , Leu <sup>6</sup> - $\beta$ ,<br>Leu <sup>6</sup> - $\gamma$ |
|                    | C=O           | 172.13, C                                            | -                             | -                                                                                                               | -                                                                                                               |
|                    | $\alpha$ -C   | 58.35, CH                                            | 4.35, ddd (4.31, 8.53, 11.47) | Ile <sup>7</sup> -CO, Ile <sup>7</sup> - $\beta$ , Ile <sup>7</sup> - $\gamma$ ,<br>Ile <sup>7</sup> - $\delta$ | -                                                                                                               |
|                    | $\beta$ -C    | 38.13, CH                                            | 1.92, d (8.53)                | Ile <sup>7</sup> -CO                                                                                            | -                                                                                                               |
|                    | $\gamma$ -C   | 25.99, CH <sub>2</sub> <sup>a.</sup><br><sup>b</sup> | 1.43, m<br>1.20, m            | Ile <sup>7</sup> - $\beta$ , Ile <sup>7</sup> - $\delta$ , Ile <sup>7</sup> - $\delta'$                         | -                                                                                                               |
|                    | $\delta$ -C   | 15.96, CH <sub>3</sub>                               | 0.92, d (4.31)                | Ile <sup>7</sup> - $\alpha$ , Ile <sup>7</sup> - $\beta$                                                        | -                                                                                                               |
|                    | $\delta'$ -C  | 11.72, CH <sub>3</sub>                               | 0.90, t (2.33)                | Ile <sup>7</sup> - $\beta$                                                                                      | -                                                                                                               |
| Fatty acid         | C=O           | 172.55, C                                            | -                             | -                                                                                                               | -                                                                                                               |
|                    | 2             | 41.99, CH <sub>2</sub> <sup>a.</sup><br><sup>b</sup> | 2.61, dd<br>2.46, dd          | FA-3, FA-4, FA-CO                                                                                               | Gln <sup>1</sup> -NH                                                                                            |
|                    | 3             | 73.83, CH                                            | 5.15 ddd (5.24, 6.89, 12.81)  | FA-4, FA-CO                                                                                                     | Gln <sup>1</sup> -NH                                                                                            |
|                    | 4             | 35.11, CH <sub>2</sub> <sup>a.</sup><br><sup>b</sup> | 1.75, m<br>1.65, m            | FA-2-a, FA-2-b, FA-3<br>FA-5-9, FA-10, FA-11                                                                    | -<br>-                                                                                                          |
|                    | 5             | 30.22, CH <sub>2</sub>                               | 1.35 <sup>b</sup> , m         | FA-5-9, FA-10, FA-11                                                                                            | -                                                                                                               |
|                    | 6             | 30.34, CH <sub>2</sub>                               | 1.29 <sup>b</sup> , m         | FA-5-9, FA-10, FA-11                                                                                            | -                                                                                                               |
|                    | 7             | 30.52, CH <sub>2</sub>                               | 1.29 <sup>b</sup> , m         | FA-5-9, FA-10, FA-11                                                                                            | -                                                                                                               |
|                    | 8             | 30.54, CH <sub>2</sub>                               | 1.29 <sup>b</sup> , m         | FA-5-9, FA-10, FA-11                                                                                            | -                                                                                                               |
|                    | 9             | 30.60, CH <sub>2</sub>                               | 1.29 <sup>b</sup> , m         | FA-5-9, FA-10, FA-11                                                                                            | -                                                                                                               |
| i                  | 10            | 26.35, CH <sub>2</sub>                               | 1.29 <sup>b</sup> , m         | FA-11, FA-5-9                                                                                                   | -                                                                                                               |
| i                  | 11            | 40.02, CH <sub>2</sub>                               | 1.16, m                       | FA-12                                                                                                           | -                                                                                                               |
| i                  | 12            | 29.06, CH                                            | 1.51, m                       | FA-11                                                                                                           | -                                                                                                               |
| i                  | 13            | 22.92, CH <sub>3</sub>                               | 0.87, d (6.60)                | FA-11, FA-12, FA-14                                                                                             | -                                                                                                               |
| i                  | 14            | 22.92, CH <sub>3</sub>                               | 0.87, d (6.60)                | FA-11, FA-12, FA-13                                                                                             | -                                                                                                               |
| n                  | 10            | 30.65, CH <sub>2</sub>                               | 1.29 <sup>b</sup> , m         | FA-11, FA-5-9                                                                                                   | -                                                                                                               |
| n                  | 11            | 30.90, CH <sub>2</sub>                               | 1.29 <sup>b</sup> , m         | FA-12                                                                                                           | -                                                                                                               |
| n                  | 12            | 29.06, CH <sub>2</sub>                               | 1.29 <sup>b</sup> , m         | FA-11                                                                                                           | -                                                                                                               |
| n                  | 13            | 23.59, CH <sub>2</sub>                               | 1.29 <sup>b</sup> , m         | FA-11, FA-12, FA-14                                                                                             | -                                                                                                               |
| n                  | 14            | 14.32, CH <sub>3</sub>                               | 0.90, t (6.60)                | FA-11, FA-12, FA-13                                                                                             | -                                                                                                               |

<sup>a</sup>Sequential ROEs. <sup>b</sup>Overlapped signals prevent determination of constant couplings.

G222-F9-7 / CD3OH / 298K / ZGPR

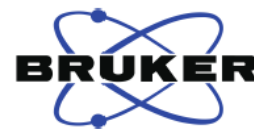

Current Data Parameters  
NAME AB231201-MLB-G222-F9-7  
EXPNO 6  
PROCNO 1

F2 - Acquisition Parameters  
Date\_ 20231201  
Time 11.18 h  
INSTRUM spect  
PROBHD Z117768\_0019 ( )  
PULPROG zgpr  
TD 32768  
SOLVENT CD3OH  
NS 16  
DS 4  
SWH 6602.113 Hz  
FIDRES 0.402961 Hz  
AQ 2.4816298 sec  
RG 18  
DW 75.733 usec  
DE 10.00 usec  
TE 298.0 K  
D1 2.50000000 sec  
D12 0.00002000 sec  
TD0 1  
SFO1 600.1929388 MHz  
NUC1 1H  
P1 7.34 usec  
PLW1 7.00000000 W  
PLW9 0.00001558 W

F2 - Processing parameters  
SI 32768  
SF 600.1900096 MHz  
WDW no  
SSB 0  
LB 0 Hz  
GB 0  
PC 4.00

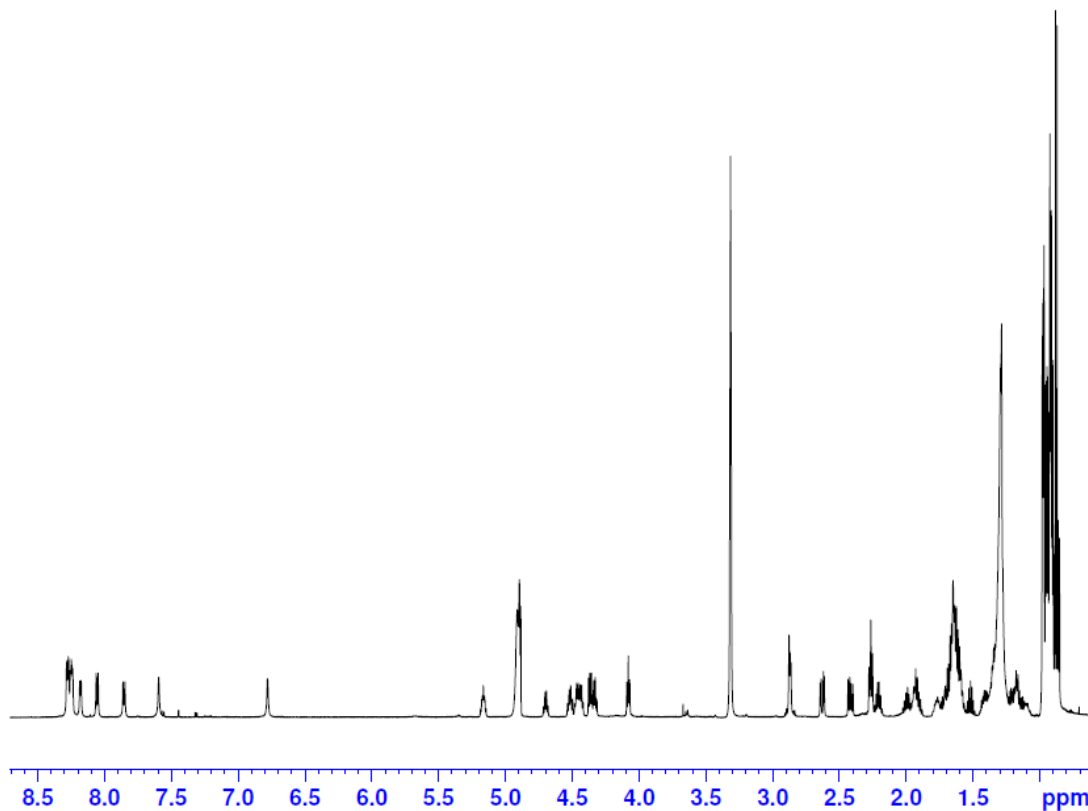

Figure S36:  $^1\text{H}$ -NMR spectrum of Lichenysin (6-7) ( $m/z$  1035.7063  $[\text{M} + \text{H}]^+$ ) (600 MHz,  $\text{CD}_3\text{OH}$ ).

G222-F9-7 / CD3OH / 298K / DEPTQ

Current Data Parameters  
NAME AB231201-MLB-G222-F9-7  
EXPNO 18  
PROCNO 1

F2 - Acquisition Parameters  
Date\_ 20231203  
Time 15.28 h  
INSTRUM spect  
PROBHD Z117768\_0019 ( )  
PULPROG zgpg30  
TD 65536  
SOLVENT CD3OH  
NS 24576  
DS 8  
SWH 36057.691 Hz  
FIDRES 1.100393 Hz  
AQ 0.9087659 sec  
RG 2050  
DW 13.867 usec  
DE 10.00 usec  
TE 298.0 K  
D1 145.0000000 sec  
D12 3.00000000 sec  
D16 0.00344828 sec  
D18 0.00002000 sec  
D19 0.00020000 sec  
D28 2.00000000 sec  
TD0 1  
SFO1 500.1344970 MHz  
NUC1 13C  
P1 11.00 usec  
PL1 2000.00 usec  
PLW0 0 W  
PLW1 103.00000000 W  
SPNAM(5) Crp60comp.4  
SFO13 0 Hz  
SFOFFS 0 Hz  
SFW 19.04189982 W  
SFO2 600.1929388 MHz  
NUC2 1H  
CHN112 1.50000000  
CHN112 CPDPRG2 wait16  
P1 11.01 usec  
P2 7.34 usec  
P3 14.18 usec  
PCPD2 80.00 usec  
PLW2 7.00000000 W  
PLW12 0.00470000 W  
PLW13 0.02847500 W  
CPNAM(1) SENSQ10.100  
CP2L 31.00 %  
CPNAM(2) SENSQ10.100  
CP22 31.00 %  
CPNAM(3) SENSQ10.100  
CP23 31.00 %  
PL16 1000.00 usec

F2 - Processing parameters  
SI 32768  
SF 500.1344970 MHz  
WDW EM  
SSB 0  
LB 1.00 Hz  
GB 0  
PC 1.40

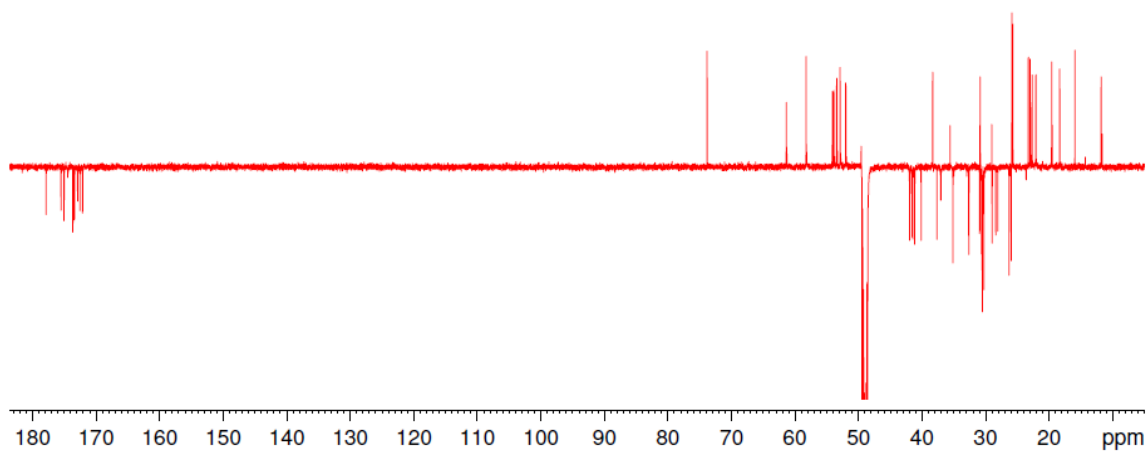

Figure S37: DEPTQ spectrum of Lichenysin (6-7) ( $m/z$  1035.7063  $[\text{M} + \text{H}]^+$ ) (600 MHz,  $\text{CD}_3\text{OH}$ ).

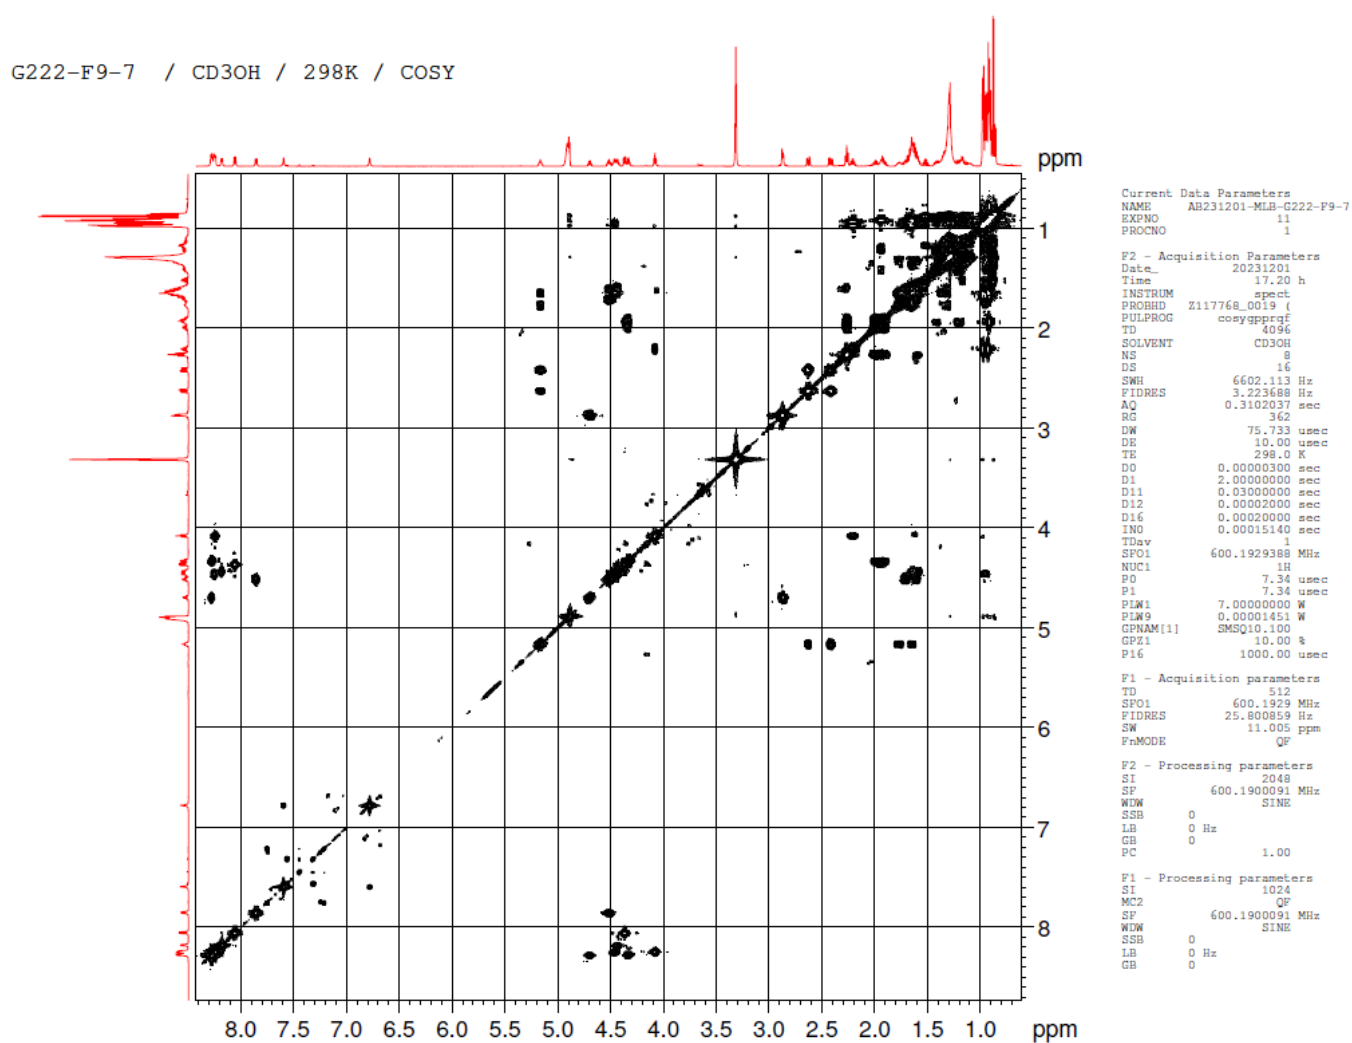

Figure S38: COSY-NMR spectrum of Lichenysin (6-7) ( $m/z$  1035.7063  $[M + H]^+$ ) (600 MHz,  $CD_3OH$ ).

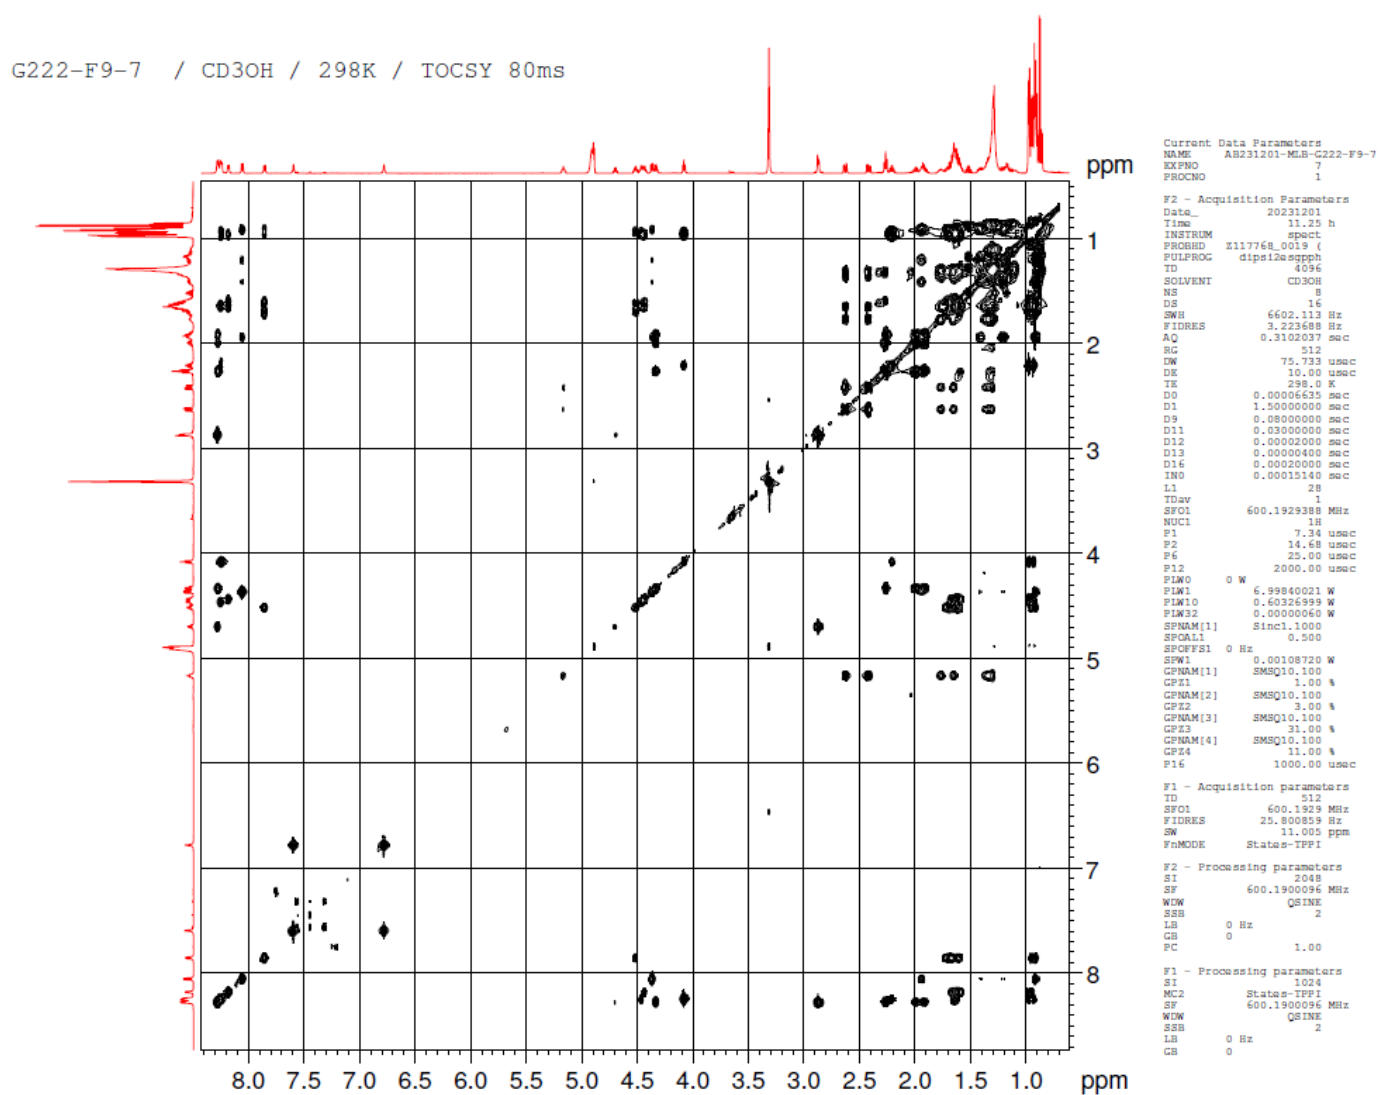

Figure S39: TOCSY-NMR spectrum of Lichenysin (6-7) ( $m/z$  1035.7063  $[M + H]^+$ ) (600 MHz, CD<sub>3</sub>OH).

G222-F9-7 / CD3OH / 298K / HSQCEDETGPSP.3

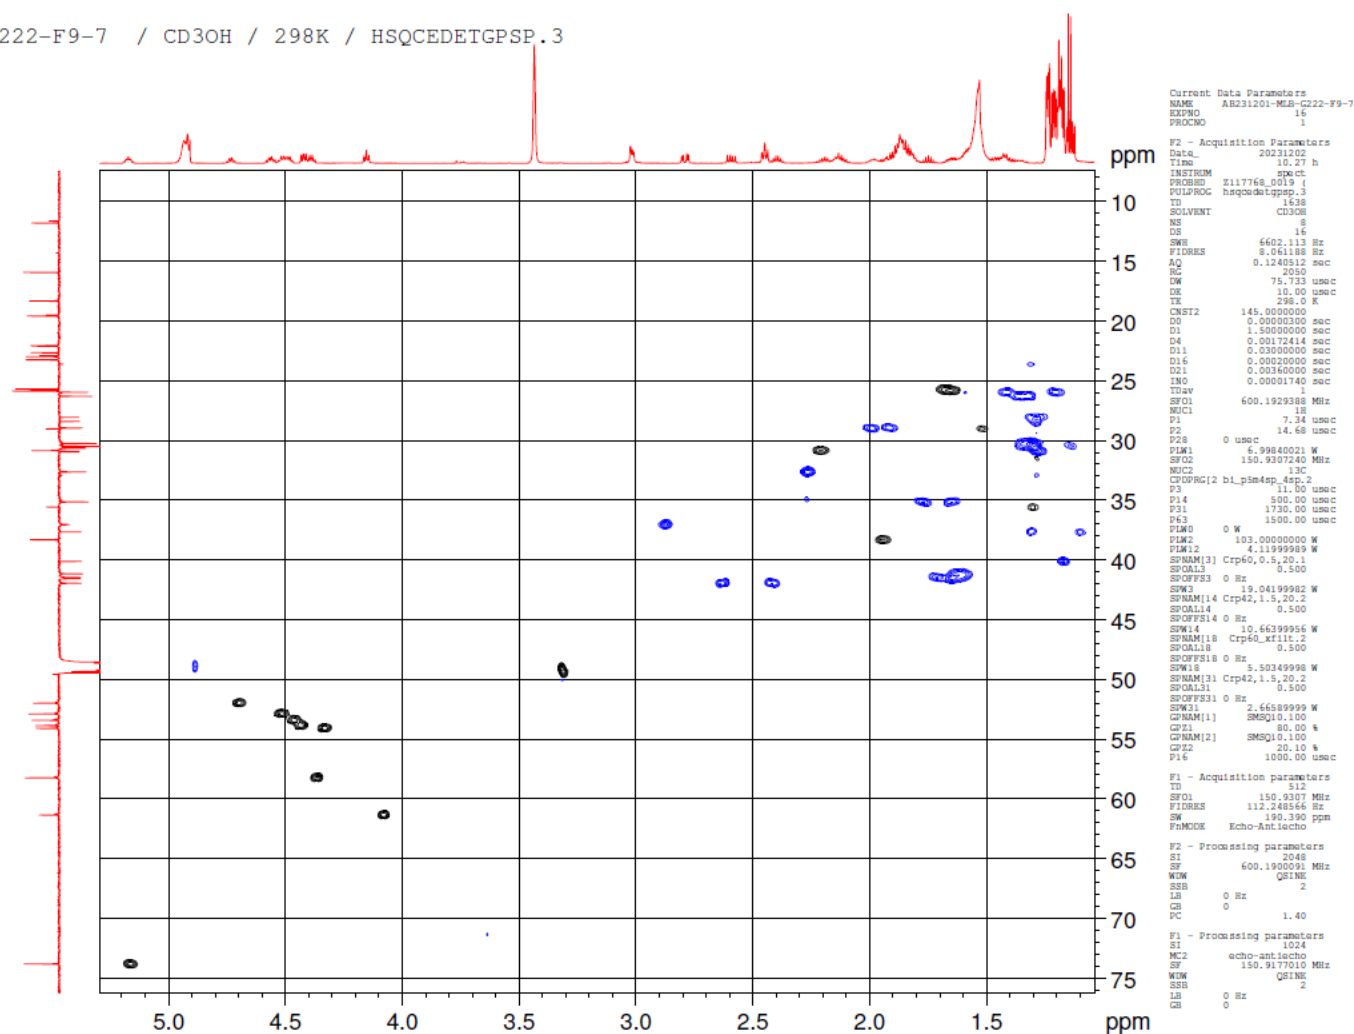

Figure S40: HSQC-NMR spectrum of Lichenysin (6-7) ( $m/z$  1035.7063  $[M + H]^+$ ) (600 MHz,  $CD_3OH$ ).

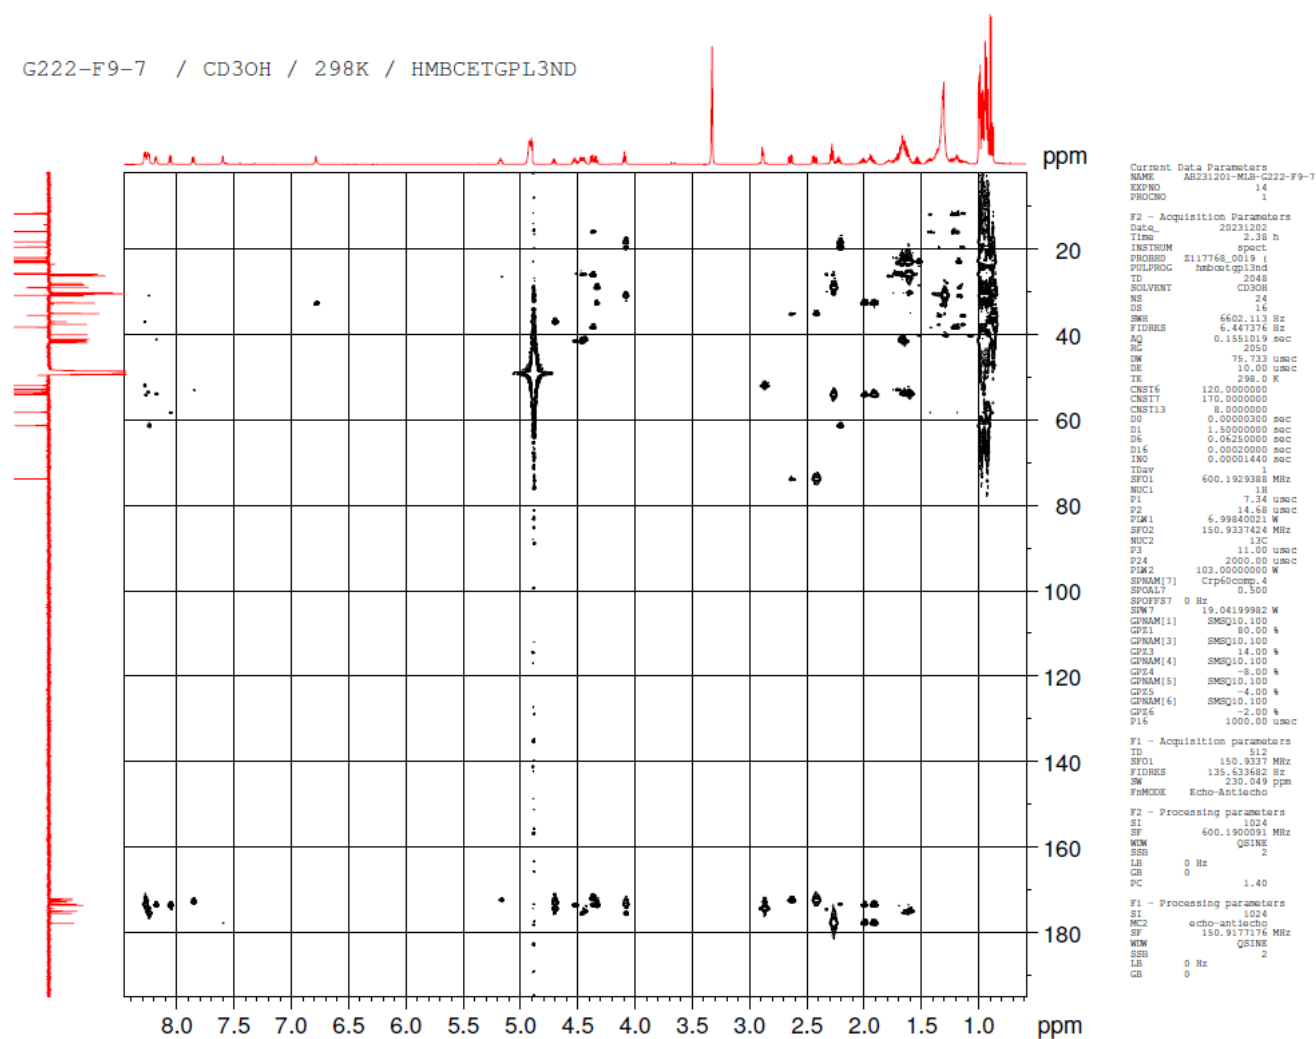

Figure S41: HMBC-NMR spectrum of Lichenysin (6-7) ( $m/z$  1035.7063  $[M + H]^+$ ) (600 MHz,  $CD_3OH$ ).



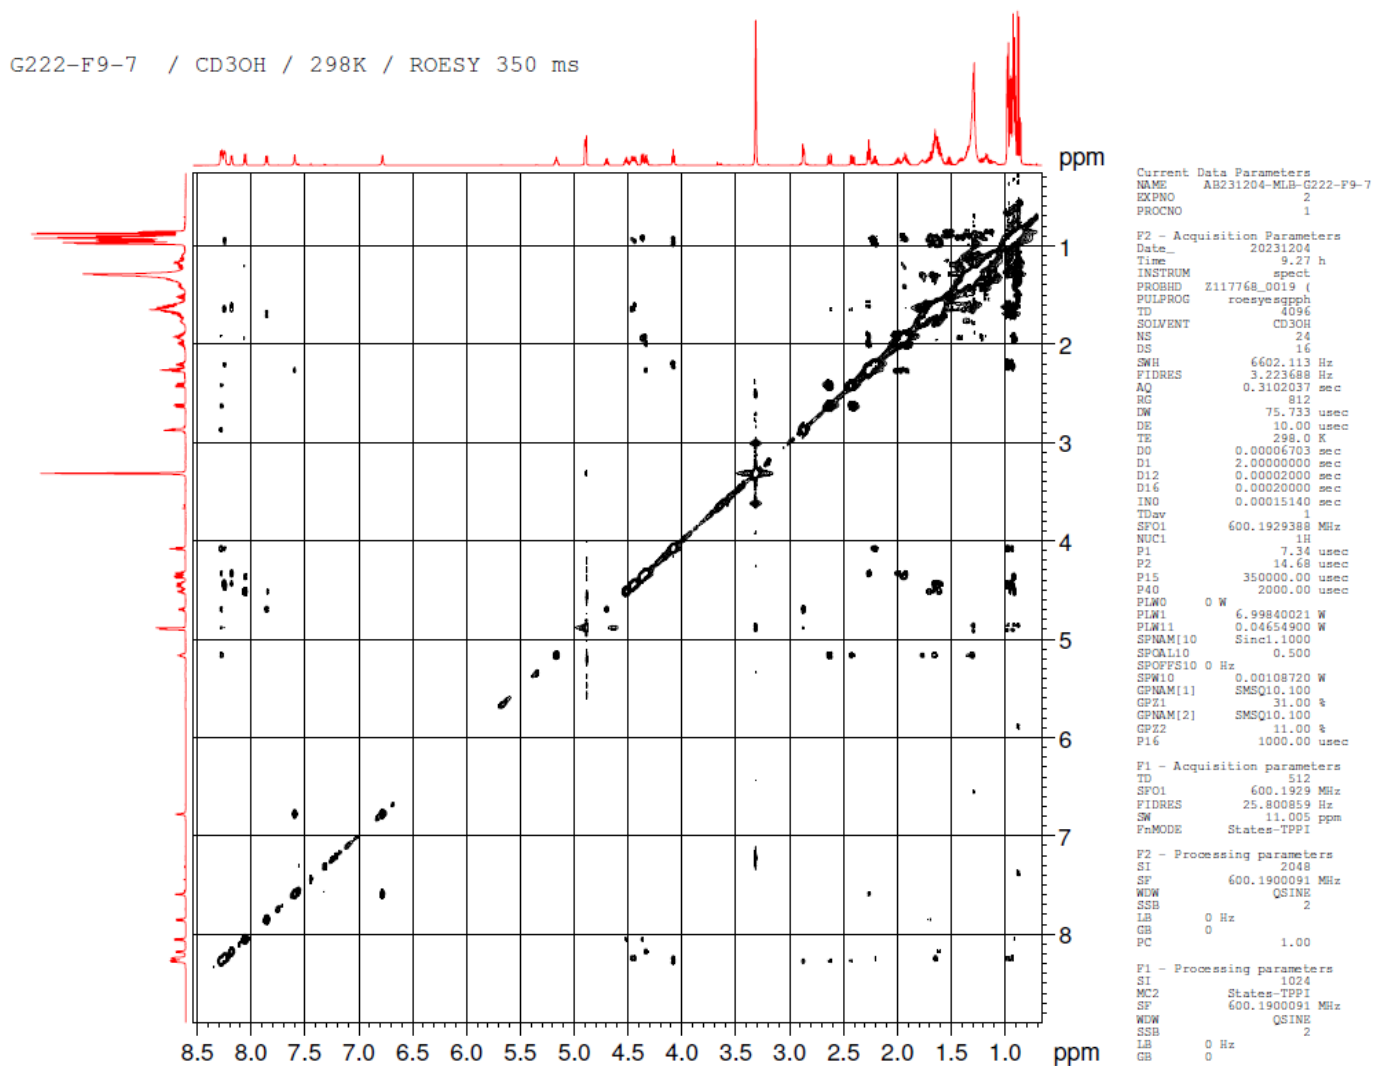

Figure S42: ROESY-NMR spectrum of Lichenysin (6-7) ( $m/z$  1035.7063  $[M + H]^+$ ) (600 MHz, CD<sub>3</sub>OH).

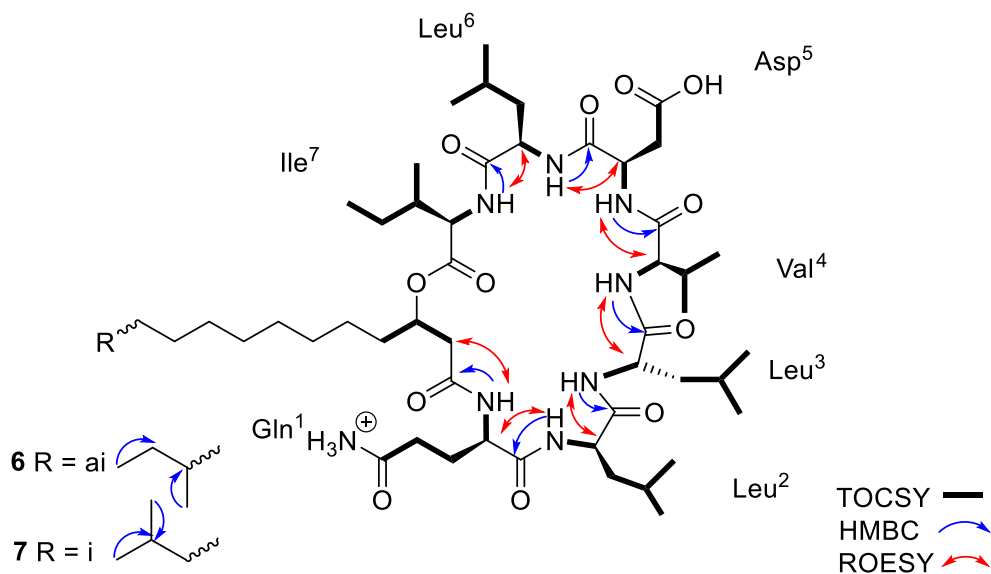

Figure S43: Structure of Lichenysins (6-7) ( $m/z$  1035.7063  $[M + H]^+$ ).

**Table S18.**  $^1\text{H}$ ,  $^{13}\text{C}$ , HMBC, and ROESY NMR data of Lichenysin (6-7) ( $m/z$  1035.7064 [ $\text{M} + \text{H}$ ] $^+$ ) (600 MHz,  $\text{CD}_3\text{OH}$ ) isoform: *ante-iso* and *iso* (0.2:0.8).

| Unit               | Pos.                           | $\delta_{\text{C}}$ , Mult.     | $\delta_{\text{H}}$ (J in Hz)  | HMBC                                                                                                                     | ROESY <sup>a</sup>                                                                                                                              |
|--------------------|--------------------------------|---------------------------------|--------------------------------|--------------------------------------------------------------------------------------------------------------------------|-------------------------------------------------------------------------------------------------------------------------------------------------|
| L-Gln <sup>1</sup> | NH                             | -                               | 8.26, d (7.56)                 | Gln <sup>1</sup> - $\alpha$ , FA-CO,                                                                                     | FA-2-a, FA-2-b, FA-3                                                                                                                            |
|                    | C=O                            | 173.62, C                       | -                              | -                                                                                                                        | -                                                                                                                                               |
|                    | $\alpha$ -C                    | 54.12, CH                       | 4.33, ddd (7.56, 11.13, 13.23) | Gln <sup>1</sup> -CO, Gln <sup>1</sup> - $\beta$ ,<br>Gln <sup>1</sup> - $\gamma$                                        | Leu <sup>2</sup> -NH                                                                                                                            |
|                    | $\beta$ -C                     | 28.96, CH <sub>2</sub> a.<br>b. | 1.98, m<br>1.91, m             | Gln <sup>1</sup> -CO, Gln <sup>1</sup> - $\alpha$ ,<br>Gln <sup>1</sup> - $\gamma$ , Gln <sup>1</sup> - $\delta$ -C=O    | Leu <sup>2</sup> -NH                                                                                                                            |
|                    | $\gamma$ -C                    | 32.63, CH <sub>2</sub>          | 2.26, t (7.56)                 | Gln <sup>1</sup> - $\alpha$ , Gln <sup>1</sup> - $\beta$ ,<br>Gln <sup>1</sup> - $\delta$ -C=O                           | Leu <sup>2</sup> -NH                                                                                                                            |
|                    | $\delta$ -C=O                  | 177.89, CO <sup>2</sup>         | -                              | -                                                                                                                        | -                                                                                                                                               |
|                    | $\varepsilon$ -NH <sub>2</sub> | - a.<br>b.                      | 7.59, brs<br>6.77 brs          | Gln <sup>1</sup> - $\delta$ -C=O, Gln <sup>1</sup> - $\gamma$                                                            | -                                                                                                                                               |
| L-Leu <sup>2</sup> | NH                             | -                               | 8.17, d (6.35)                 | Gln <sup>1</sup> -CO                                                                                                     | Gln <sup>1</sup> - $\alpha$ , Gln <sup>1</sup> - $\beta$ , Gln <sup>1</sup> - $\gamma$                                                          |
|                    | C=O                            | 175.09, C                       | -                              | -                                                                                                                        | -                                                                                                                                               |
|                    | $\alpha$ -C                    | 53.90, CH                       | 4.43, ddd (5.09, 6.35, 14.25)  | Leu <sup>2</sup> -CO, Leu <sup>2</sup> - $\beta$ ,<br>Leu <sup>2</sup> - $\gamma$                                        | Leu <sup>3</sup> -NH                                                                                                                            |
|                    | $\beta$ -C                     | 41.17, CH <sub>2</sub> a.<br>b. | 1.64, m<br>1.61, m             | Leu <sup>2</sup> -CO, Leu <sup>2</sup> - $\alpha$ ,<br>Leu <sup>2</sup> - $\gamma$                                       | Leu <sup>3</sup> -NH                                                                                                                            |
|                    | $\gamma$ -C                    | 25.87, CH                       | 1.64, m                        | Leu <sup>2</sup> - $\alpha$ , Leu <sup>2</sup> - $\beta$ ,<br>Leu <sup>2</sup> - $\delta$ , Leu <sup>2</sup> - $\delta'$ | Leu <sup>3</sup> -NH                                                                                                                            |
|                    | $\delta$ -C                    | 22.98, CH <sub>3</sub>          | 0.97, d (4.88)                 | Leu <sup>2</sup> - $\beta$ , Leu <sup>2</sup> - $\gamma$ , Leu <sup>2</sup> - $\delta'$                                  | -                                                                                                                                               |
|                    | $\delta'$ -C                   | 23.28, CH <sub>3</sub>          | 0.95, d (4.88)                 | Leu <sup>2</sup> - $\beta$ , Leu <sup>2</sup> - $\gamma$ , Leu <sup>2</sup> - $\delta$                                   | -                                                                                                                                               |
| D-Leu <sup>3</sup> | NH                             | -                               | 8.25, d (6.63)                 | Leu <sup>2</sup> -CO, Leu <sup>3</sup> - $\alpha$                                                                        | Leu <sup>2</sup> - $\alpha$ , Leu <sup>2</sup> - $\beta$ , Leu <sup>2</sup> - $\gamma$                                                          |
|                    | C=O                            | 175.52, C                       | -                              | -                                                                                                                        | -                                                                                                                                               |
|                    | $\alpha$ -C                    | 53.44, CH                       | 4.45, ddd (5.94, 6.63, 14.25)  | Leu <sup>3</sup> -CO, Leu <sup>3</sup> - $\beta$ ,<br>Leu <sup>3</sup> - $\gamma$                                        | Val <sup>4</sup> -NH                                                                                                                            |
|                    | $\beta$ -C                     | 41.56, CH <sub>2</sub> a.<br>b. | 1.61, m<br>1.64, m             | Leu <sup>3</sup> -CO, Leu <sup>3</sup> - $\alpha$ ,<br>Leu <sup>3</sup> - $\gamma$                                       | Val <sup>4</sup> -NH                                                                                                                            |
|                    | $\gamma$ -C                    | 25.70, CH                       | 1.64, m                        | Leu <sup>3</sup> - $\alpha$ , Leu <sup>3</sup> - $\beta$                                                                 | Val <sup>4</sup> -NH                                                                                                                            |
|                    | $\delta$ -C                    | 22.07, CH <sub>3</sub>          | 0.91, d (3.95)                 | Leu <sup>3</sup> - $\beta$ , Leu <sup>3</sup> - $\gamma$ , Leu <sup>3</sup> - $\delta'$                                  | -                                                                                                                                               |
|                    | $\delta'$ -C                   | 23.26, CH <sub>3</sub>          | 0.97, d (4.88)                 | Leu <sup>3</sup> - $\beta$ , Leu <sup>3</sup> - $\gamma$ , Leu <sup>3</sup> - $\delta$                                   | -                                                                                                                                               |
| L-Val <sup>4</sup> | NH                             | -                               | 8.24, d (6.70)                 | Val <sup>4</sup> - $\alpha$ , Val <sup>4</sup> - $\beta$ , Leu <sup>3</sup> -CO                                          | Leu <sup>3</sup> - $\alpha$ , Leu <sup>3</sup> - $\beta$ , Leu <sup>3</sup> - $\gamma$                                                          |
|                    | C=O                            | 173.37 C                        | -                              | -                                                                                                                        | -                                                                                                                                               |
|                    | $\alpha$ -C                    | 61.35, CH                       | 4.09, dd (5.26, 6.70)          | Val <sup>4</sup> -CO, Val <sup>4</sup> - $\beta$ ,<br>Val <sup>4</sup> - $\gamma$ , Val <sup>4</sup> - $\gamma'$         | Asp <sup>5</sup> -NH                                                                                                                            |
|                    | $\beta$ -C                     | 30.93, CH                       | 2.20, ddd (5.26, 6.70, 13.20)  | Val <sup>4</sup> - $\alpha$ , Val <sup>4</sup> - $\gamma$ , Val <sup>4</sup> - $\gamma'$                                 | Asp <sup>5</sup> -NH                                                                                                                            |
|                    | $\gamma$ -C                    | 19.62, CH <sub>3</sub>          | 0.97, d (4.88)                 | Val <sup>4</sup> - $\beta$ , Val <sup>4</sup> - $\gamma'$                                                                | Asp <sup>5</sup> -NH                                                                                                                            |
|                    | $\gamma'$ -C                   | 18.31, CH <sub>3</sub>          | 0.92, d (3.95)                 | Val <sup>4</sup> - $\beta$ , Val <sup>4</sup> - $\gamma$                                                                 | Asp <sup>5</sup> -NH                                                                                                                            |
| L-Asp <sup>5</sup> | NH                             | -                               | 8.28, d (7.43)                 | Val <sup>4</sup> -CO, Asp <sup>5</sup> - $\alpha$                                                                        | Val <sup>4</sup> - $\alpha$ , Val <sup>4</sup> - $\beta$ , Val <sup>4</sup> - $\gamma$ ,<br>Val <sup>4</sup> - $\gamma'$ , Leu <sup>6</sup> -NH |
|                    | C=O                            | 172.99, C                       | -                              | -                                                                                                                        | -                                                                                                                                               |
|                    | $\alpha$ -C                    | 52.01, CH                       | 4.70, dd (7.43, 12.55)         | Asp <sup>5</sup> -CO, Asp <sup>5</sup> - $\beta$ ,<br>Asp <sup>5</sup> - $\gamma$ -C=O                                   | Leu <sup>6</sup> -NH                                                                                                                            |
|                    | $\beta$ -C                     | 37.10, CH <sub>2</sub>          | 2.84, dd (3.19, 7.43)          | Asp <sup>5</sup> -CO, Asp <sup>5</sup> - $\alpha$ ,<br>Asp <sup>5</sup> - $\gamma$ -C=O                                  | Leu <sup>6</sup> -NH                                                                                                                            |
|                    | $\gamma$ -C=O                  | 174.49, CO <sup>2</sup>         | -                              | -                                                                                                                        | -                                                                                                                                               |
| D-Leu <sup>6</sup> | NH                             | -                               | 7.85, d (8.63)                 | Asp <sup>5</sup> -CO                                                                                                     | Asp <sup>5</sup> - $\alpha$ , Asp <sup>5</sup> -NH, Ile <sup>6</sup> -NH                                                                        |
|                    | C=O                            | 173.60, C                       | -                              | -                                                                                                                        | -                                                                                                                                               |
|                    | $\alpha$ -C                    | 52.91, CH                       | 4.51, ddd (5.77, 8.63, 14.59)  | Leu <sup>6</sup> -CO, Leu <sup>6</sup> - $\beta$ ,                                                                       | Ile <sup>7</sup> -NH                                                                                                                            |
|                    | $\beta$ -C                     | 41.45, CH <sub>2</sub> a.<br>b. | 1.70, m<br>1.60, m             | Leu <sup>6</sup> -CO, Leu <sup>6</sup> - $\alpha$ ,<br>Leu <sup>6</sup> - $\gamma$                                       | Ile <sup>7</sup> -NH                                                                                                                            |
|                    | $\gamma$ -C                    | 25.86, CH                       | 1.64, m                        | Leu <sup>6</sup> - $\alpha$ , Leu <sup>6</sup> - $\beta$                                                                 | Ile <sup>7</sup> -NH                                                                                                                            |
|                    | $\delta$ -C                    | 22.07, CH <sub>3</sub>          | 0.91, d (3.95)                 | Leu <sup>6</sup> - $\beta$ , Leu <sup>3</sup> - $\delta$                                                                 | -                                                                                                                                               |
|                    | $\delta'$ -C                   | 22.65, CH <sub>3</sub>          | 0.94, d (3.58)                 | Leu <sup>6</sup> - $\beta$ , Leu <sup>6</sup> - $\delta'$                                                                | -                                                                                                                                               |

| Unit               | Pos.         | $\delta_C$ , Mult.             | $\delta_H$ (J in Hz)                             | HMBC                                                                                                                     | ROESY <sup>a</sup>                                                                                              |
|--------------------|--------------|--------------------------------|--------------------------------------------------|--------------------------------------------------------------------------------------------------------------------------|-----------------------------------------------------------------------------------------------------------------|
| L-Ile <sup>7</sup> | NH           | -                              | 8.05, d (8.27)                                   | Leu <sup>6</sup> -CO                                                                                                     | Leu <sup>6</sup> -NH, Leu <sup>6</sup> - $\alpha$ , Leu <sup>6</sup> - $\beta$ ,<br>Leu <sup>6</sup> - $\gamma$ |
|                    | C=O          | 172.12, C                      | -                                                | -                                                                                                                        | -                                                                                                               |
|                    | $\alpha$ -C  | 58.21, CH                      | 4.36, dd (5.60, 8.27)                            | Ile <sup>7</sup> -CO, Ile <sup>7</sup> - $\beta$ , Ile <sup>7</sup> - $\gamma$ ,<br>Ile <sup>7</sup> - $\delta$          | -                                                                                                               |
|                    | $\beta$ -C   | 38.37, CH                      | 1.93, q (8.27)                                   | Ile <sup>7</sup> - $\beta$ , Ile <sup>7</sup> - $\gamma$ ,<br>Ile <sup>7</sup> - $\delta$ , Ile <sup>7</sup> - $\delta'$ | -                                                                                                               |
|                    | $\gamma$ -C  | 25.99, CH <sub>2</sub> a.<br>b | 1.41, m<br>1.20, m                               | Ile <sup>7</sup> - $\beta$ , Ile <sup>7</sup> - $\delta$ , Ile <sup>7</sup> - $\delta'$                                  | -                                                                                                               |
|                    | $\delta$ -C  | 15.96, CH <sub>3</sub>         | 0.92, d (4.31)                                   | Ile <sup>7</sup> - $\alpha$ , Ile <sup>7</sup> - $\beta$ , Ile <sup>7</sup> - $\gamma$                                   | -                                                                                                               |
|                    | $\delta'$ -C | 11.79, CH <sub>3</sub>         | 0.89, t (2.33)                                   | Ile <sup>7</sup> - $\beta$ , Ile <sup>7</sup> - $\gamma$                                                                 | -                                                                                                               |
| Fatty acid         | C=O          | 172.55, C                      | -                                                | -                                                                                                                        | -                                                                                                               |
|                    | 2            | 41.96, CH <sub>2</sub> a.<br>b | 2.62, dd (4.58, 12.21)<br>2.43, dd (7.46, 14.31) | FA-3, FA-4, FA-CO                                                                                                        | Gln <sup>1</sup> -NH                                                                                            |
|                    | 3            | 73.83, CH                      | 5.15 ddd (4.58, 7.46, 12.21)                     | FA-4, FA-CO                                                                                                              | Gln <sup>1</sup> -NH                                                                                            |
|                    | 4            | 35.14, CH <sub>2</sub> a.<br>b | 1.77, m<br>1.65, m                               | FA-2-a, FA-2-b, FA-3<br>FA-3, FA-5-11                                                                                    | -<br>-                                                                                                          |
| ai                 | 5            | 26.32, CH <sub>2</sub> *       | 1.35 <sup>b</sup> , m                            | FA-5-11, FA-12, FA-13                                                                                                    | -                                                                                                               |
| ai                 | 6            | 28.07, CH <sub>2</sub> *       | 1.29 <sup>b</sup> , m                            | FA-5-11, FA-12, FA-13                                                                                                    | -                                                                                                               |
| ai                 | 7            | 30.24, CH <sub>2</sub> *       | 1.29 <sup>b</sup> , m                            | FA-5-11, FA-12, FA-13                                                                                                    | -                                                                                                               |
| ai                 | 8            | 30.51, CH <sub>2</sub> *       | 1.29 <sup>b</sup> , m                            | FA-5-11, FA-12, FA-13                                                                                                    | -                                                                                                               |
| ai                 | 9            | 30.52, CH <sub>2</sub> *       | 1.29 <sup>b</sup> , m                            | FA-5-11, FA-12, FA-13                                                                                                    | -                                                                                                               |
| ai                 | 10           | 30.65, CH <sub>2</sub> *       | 1.29 <sup>b</sup> , m                            | FA-5-11, FA-12, FA-13                                                                                                    | -                                                                                                               |
| ai                 | 11           | 37.67, CH <sub>2</sub> a.<br>b | 1.09, m<br>1.29, m                               | FA-5-11, FA-12, FA-13                                                                                                    | -                                                                                                               |
| ai                 | 12           | 35.54, CH <sub>2</sub>         | 1.29 <sup>b</sup> , m                            | FA-13, FA-5-11                                                                                                           | -                                                                                                               |
| ai                 | 13           | 30.53, CH a.<br>b              | 1.29 <sup>b</sup> , m<br>1.13, m                 | FA-12, FA-14, FA-15                                                                                                      | -                                                                                                               |
| ai                 | 14           | 19.50, CH <sub>3</sub>         | 0.85, d (4.84)                                   | FA-12                                                                                                                    | -                                                                                                               |
| ai                 | 15           | 11.63, CH <sub>3</sub>         | 0.86, t (6.15)                                   | FA-11, FA-12, FA-13                                                                                                      | -                                                                                                               |
| i                  | 5            | 26.33, CH <sub>2</sub> *       | 1.35 <sup>b</sup> , m                            | FA-5-11, FA-12, FA-13                                                                                                    | -                                                                                                               |
| i                  | 6            | 28.42, CH <sub>2</sub> *       | 1.29 <sup>b</sup> , m                            | FA-5-11, FA-12, FA-13                                                                                                    | -                                                                                                               |
| i                  | 7            | 30.40, CH <sub>2</sub> *       | 1.29 <sup>b</sup> , m                            | FA-5-11, FA-12, FA-13                                                                                                    | -                                                                                                               |
| i                  | 8            | 30.51, CH <sub>2</sub> *       | 1.29 <sup>b</sup> , m                            | FA-5-11, FA-12, FA-13                                                                                                    | -                                                                                                               |
| i                  | 9            | 30.53, CH <sub>2</sub>         | 1.29 <sup>b</sup> , m                            | FA-5-11, FA-12, FA-13                                                                                                    | -                                                                                                               |
| i                  | 10           | 30.65, CH <sub>2</sub> *       | 1.29 <sup>b</sup> , m                            | FA-5-11, FA-12, FA-13                                                                                                    | -                                                                                                               |
| i                  | 11           | 26.32, CH <sub>2</sub>         | 1.29 <sup>b</sup> , m                            | FA-12, FA-14, FA-15                                                                                                      | -                                                                                                               |
| i                  | 12           | 40.13, CH <sub>2</sub>         | 1.17, m                                          | FA-11, FA-14, FA-15                                                                                                      | -                                                                                                               |
| i                  | 13           | 29.02, CH <sub>2</sub>         | 1.51, m                                          | FA-12, FA-14, FA-15                                                                                                      | -                                                                                                               |
| i                  | 14           | 22.91, CH <sub>3</sub>         | 0.87, d (6.55)                                   | FA-11, FA-13, FA-15                                                                                                      | -                                                                                                               |
| i                  | 15           | 22.91, CH <sub>3</sub>         | 0.87, d (6.55)                                   | FA-11, FA-13, FA-14                                                                                                      | -                                                                                                               |

<sup>a</sup> Sequential ROEs <sup>b</sup> Overlapped signals prevent determination of constant couplings \* May be interchanged.

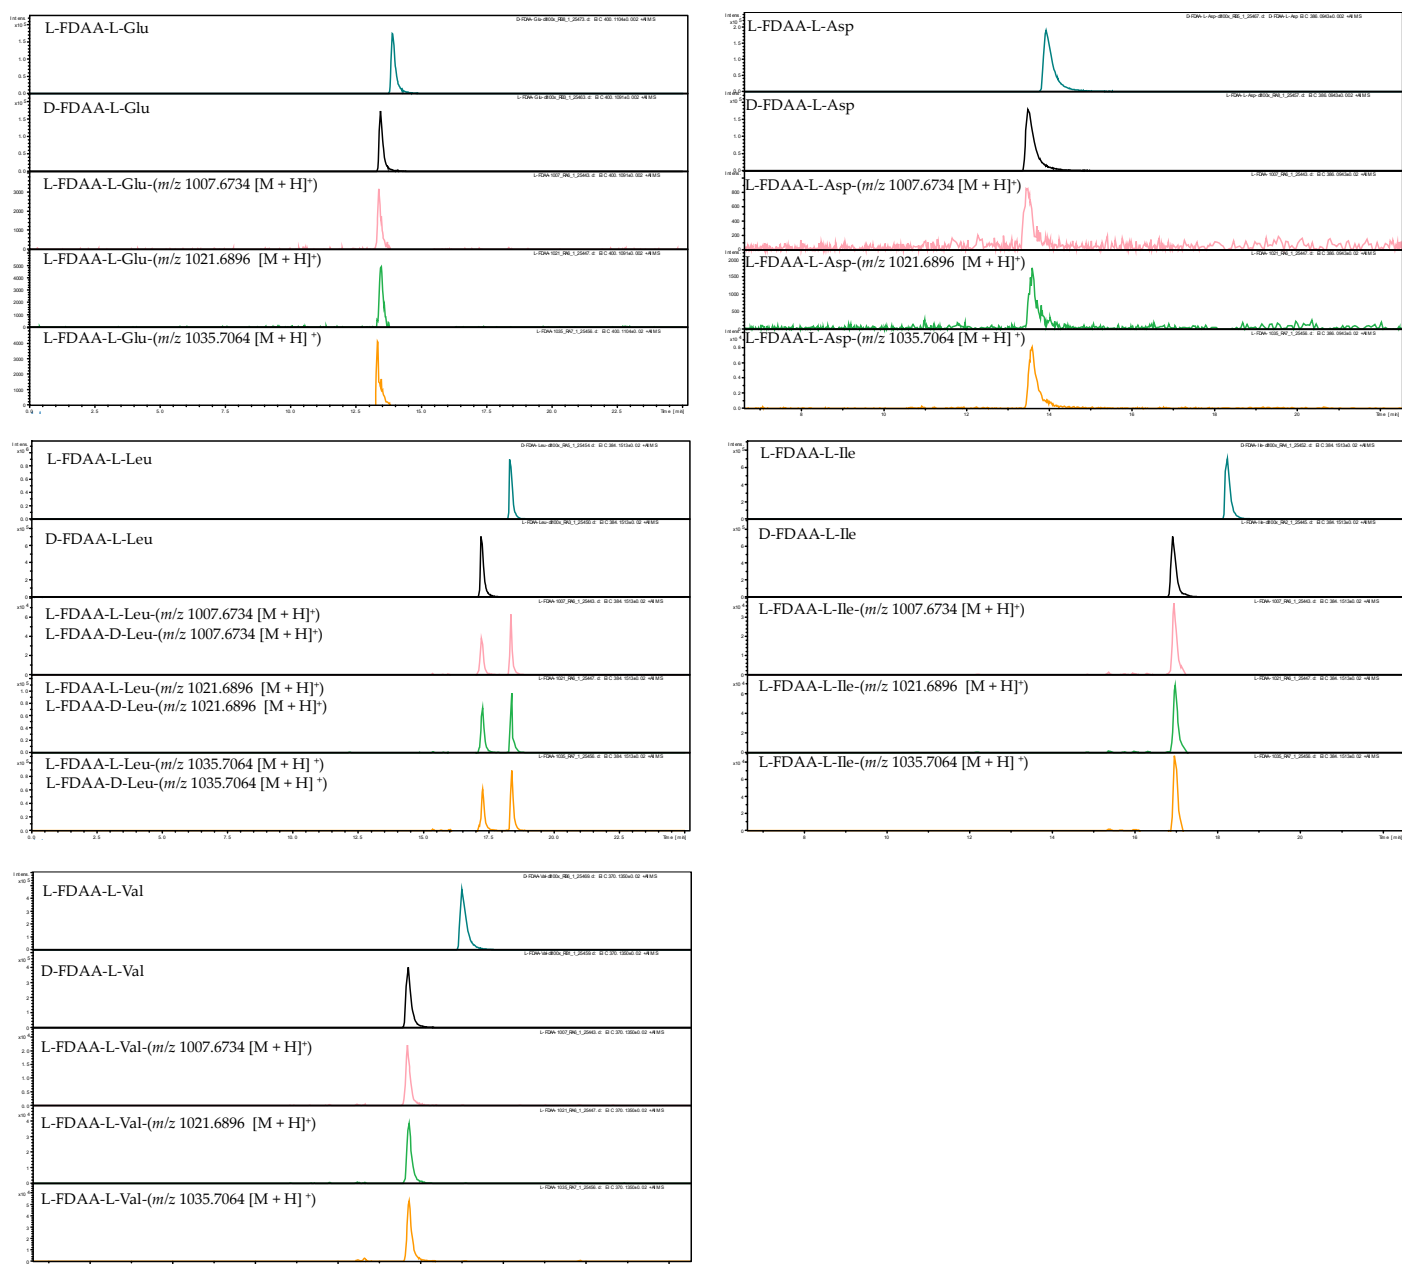

Figure S44: Marfey's analysis in positive ion mode high-resolution ESI mass spectrum

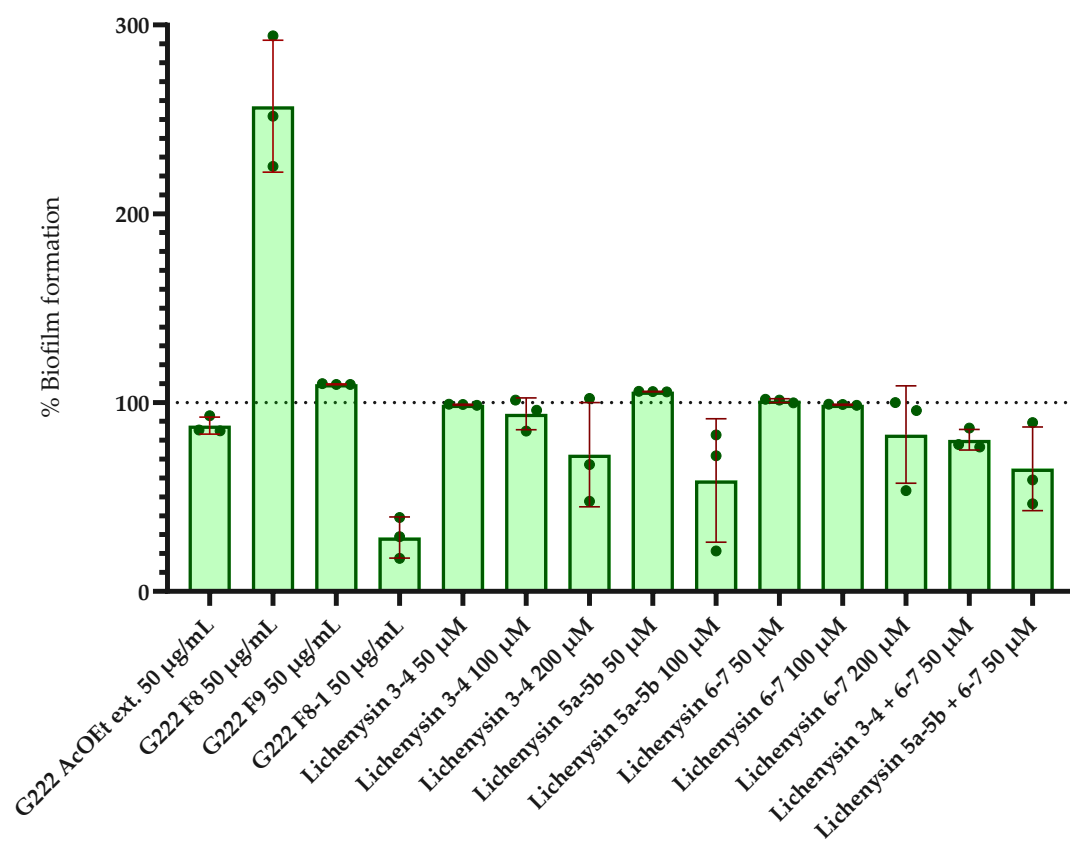

Figure S45: Biofilm-forming activity against *Pseudomonas aeruginosa* MUC-N1 (n = 3).

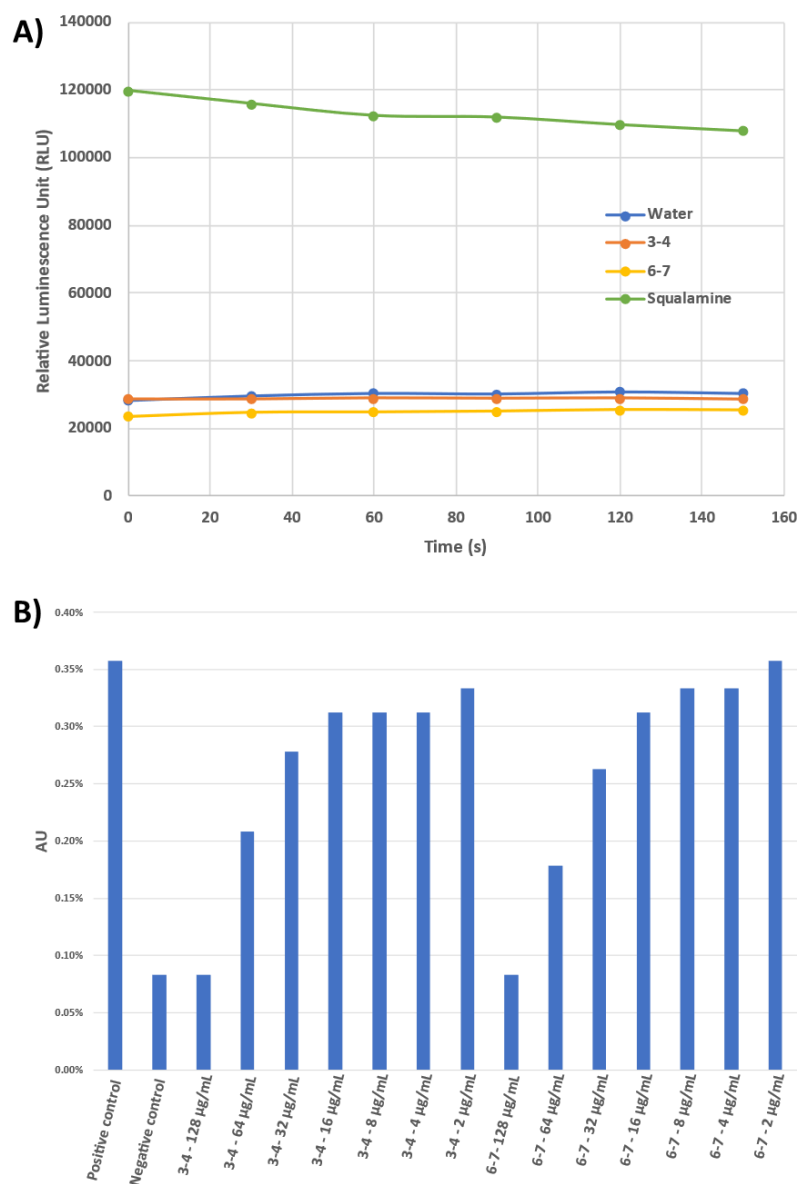

**Figure S46:** A) ATP release in *S. aureus* MRSA exhibited by compounds (3-4) and (6-7) as determined using ATP efflux assay. Squalamine ( $100 \mu\text{g.mL}^{-1}$ ) was the positive control and water was the negative control. Compounds were tested at a final concentration of  $100 \mu\text{g.mL}^{-1}$ , and results are reported as relative luminescence unit. B) Bacterial growth inhibition exhibited by (3-4) and (6-7) against *S. aureus* MRSA (CF-Marseille) with different concentrations. Positive control was bacteria only and negative control was media only.
